# Supplementary material for: Genetic heterogeneity and prognostic impact of recurrent ANK2 and TP53 mutations in mantle cell lymphoma: a multi-centre cohort study
Source: PubMed Central journal article supplement (PMC7414214; doi:10.1038/s41598-020-70310-9), 2020-08-07
Supplement: 41598_2020_70310_MOESM1_ESM.pdf [file 41598_2020_70310_MOESM1_ESM.pdf]

## Supplementary Information

### **Genetic heterogeneity and prognostic impact of recurrent *ANK2* and *TP53* mutations in mantle cell lymphoma: A multi-centre cohort study**

Seri Jeong<sup>1,13</sup>, Yu Jin Park<sup>2,13</sup>, Woobin Yun<sup>2</sup>, Seung-Tae Lee<sup>2</sup>, Jong Rak Choi<sup>2</sup>, Cheolwon Suh<sup>3</sup>, Jae-Cheol Jo<sup>4</sup>, Hee Jeong Cha<sup>5</sup>, Jee-Yeong Jeong<sup>6</sup>, HeeKyung Chang<sup>7</sup>, Yoon Jin Cha<sup>8</sup>, Hyerim Kim<sup>9</sup>, Min-Jeong Park<sup>1</sup>, Wonkeun Song<sup>1</sup>, Eun-Hae Cho<sup>10</sup>, Eun-Goo Jeong<sup>10</sup>, Junnam Lee<sup>10</sup>, Yongmin Park<sup>11</sup>, Yong Seok Lee<sup>11</sup>, Da Jung Kim<sup>12</sup> & Ho Sup Lee<sup>12\*</sup>

<sup>1</sup>Department of Laboratory Medicine, Kangnam Sacred Heart Hospital, Hallym University College of Medicine, Seoul, 07441, South Korea. <sup>2</sup>Department of Laboratory Medicine, Yonsei University College of Medicine, Seoul, 03722, South Korea. <sup>3</sup>Department of Oncology, Asan Medical Center, University of Ulsan College of Medicine, Ulsan, 05505, South Korea. <sup>4</sup>Department of Haematology and Oncology, Ulsan University Hospital, University of Ulsan College of Medicine, Ulsan, 44033, South Korea. <sup>5</sup>Department of Pathology, Ulsan University Hospital, University of Ulsan College of Medicine, Ulsan, 44033, South Korea. <sup>6</sup>Department of Biochemistry, Kosin University College of Medicine, Busan, 49267, South Korea. <sup>7</sup>Department of Pathology, Kosin University Gospel Hospital, University of Kosin College of Medicine, Busan, 49267, South Korea. <sup>8</sup>Department of Pathology, Gangnam Severance Hospital, Yonsei University College of Medicine, Seoul, 06273, South Korea. <sup>9</sup>Department of Laboratory Medicine, Pusan National University

Hospital, Busan, 49241, Korea. <sup>10</sup>Department of Genomics, Green Cross Genome, Yongin, 16924, South Korea. <sup>11</sup>Department of Bioinformatics, Samsung SDS, Seoul, 05510, South Korea. <sup>12</sup>Division of Haematology-Oncology, Department of Internal Medicine, Kosin University College of Medicine, Busan, 49267, South Korea. <sup>13</sup>These authors contributed equally: Seri Jeong and Yu Jin Park.

\* Corresponding author: Ho Sup Lee

Division of Haematology-Oncology, Department of Internal Medicine, Kosin University College of Medicine, 262 Gamcheon-ro, Seo-gu, 49267, Busan, South Korea.

Tel: (+82) 51-990-6363, Fax: (+82) 51-990-5820

E-mail: hs52silver@gmail.com

### **Supplemental table and figure legends**

**Supplementary Figure S1.** Kaplan-Meier curves classified by MIPI-genetic index for overall survival and progression-free survival of patients with mantle cell lymphoma. Kaplan-Meier curves of (a) classes for overall survival, (b) classes for progression-free survival.

**Supplementary Figure S2.** Flow chart of sample selection.

**Supplementary Table S1.** Clinical data and sample information of mantle cell lymphoma patients in our cohort.

**Supplementary Table S2.** Comparison with other mantle cell lymphoma studies for recurrently mutated genes.

**Supplementary Table S3.** Most significant 25 pathways sorted by *P*-values.

**Supplementary Table S4.** The 588 gene list of targeted lymphoma panel set used for next-generation sequencing experiments.

**Supplementary Table S5.** Read depth and coverage of targeted lymphoma panel sequencing.

**Supplementary Table S6.** Read depth and coverage of whole-exome sequencing.

**Supplementary Table S7.** Genetic variants identified in 53 patients with mantle cell lymphoma.

**Supplementary Figure S1.**

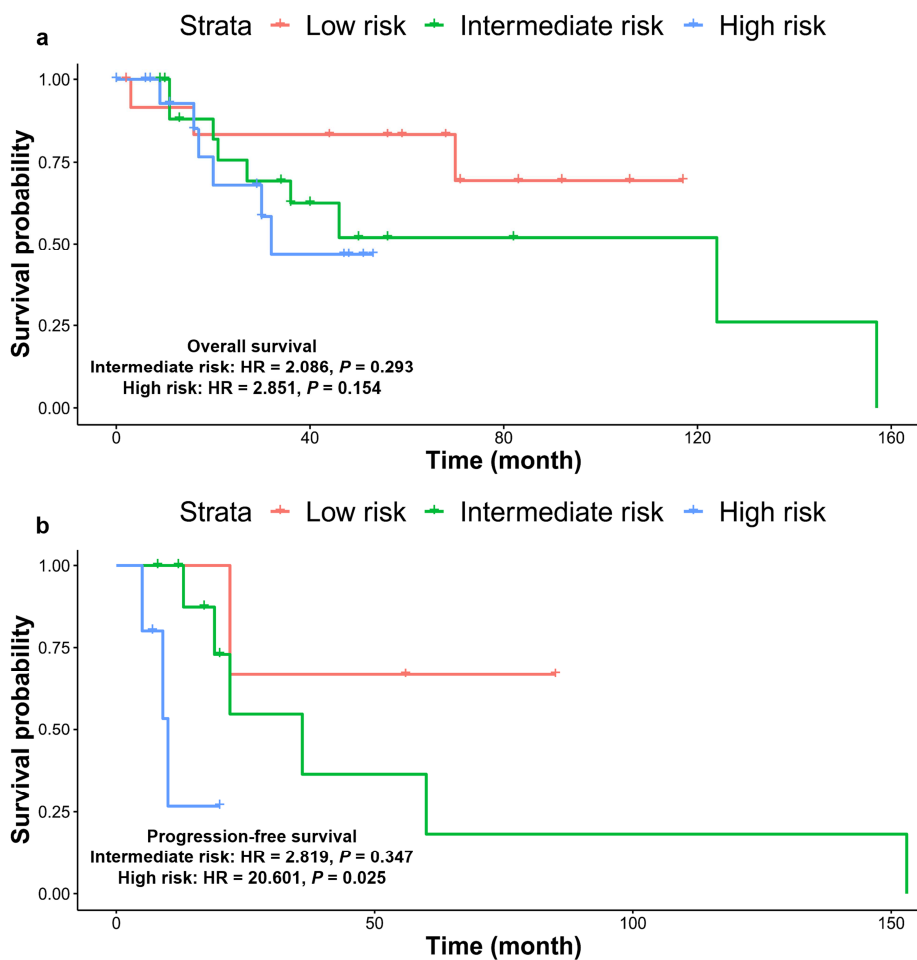

## Supplementary Figure S2.

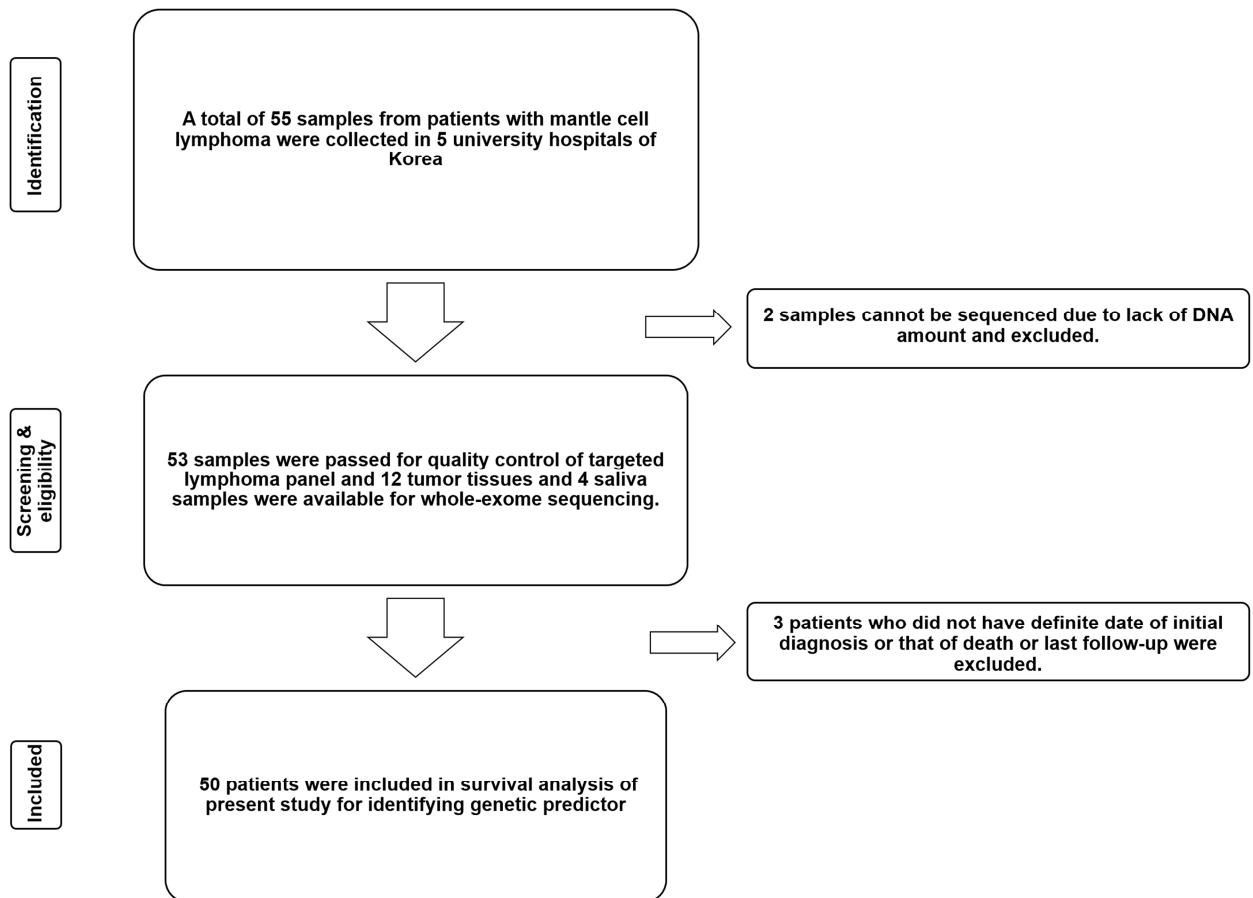

| Patient | Age | Sex | Ki-67 (%) | β2-MG    | LDH      | Cytogenetic aberration | MIPI | IPI | Initial treatment* | ASCT | Radiotherapy | Efficacy | Sample status | OS (months) | PFS (months) | Cause of death                                  |
|---------|-----|-----|-----------|----------|----------|------------------------|------|-----|--------------------|------|--------------|----------|---------------|-------------|--------------|-------------------------------------------------|
| MCL2    | 40  | M   | 70        | Elevated | Elevated | Normal                 | 4    | 4   | R-CHOP             | Yes  | No           | PR       | Relapse       | 11          | 7            | NA                                              |
| MCL3    | 46  | M   | NA        | Normal   | Normal   | Normal                 | 1    | 2   | R-CHOP             | No   | Yes          | PR       | Initial       | 117         | NA           | NA                                              |
| MCL4    | 70  | M   | NA        | Elevated | Normal   | Normal                 | 3    | 3   | R-CHOP             | No   | No           | NA       | NA            | 36          | NA           | Pneumonia                                       |
| MCL5    | 63  | M   | NA        | Elevated | Normal   | Normal                 | NA   | 2   | R-FC               | No   | No           | PR       | NA            | 16          | NA           | Pneumonia                                       |
| MCL6    | 64  | M   | 60        | Elevated | Elevated | Normal                 | 7    | 3   | R-hyper-CVAD       | No   | No           | CR       | Initial       | 82          | NA           | NA                                              |
| MCL7    | 41  | M   | 50        | Elevated | Elevated | Normal                 | 2    | 0   | R-hyper-CVAD       | No   | No           | CR       | Initial       | 53          | NA           | NA                                              |
| MCL8    | 51  | M   | NA        | Normal   | Elevated | Normal                 | NA   | 2   | R-hyper-CVAD       | Yes  | No           | PR       | Initial       | 48          | NA           | NA                                              |
| MCL9    | 68  | F   | NA        | Normal   | Normal   | Normal                 | 4    | 2   | R-CHOP             | No   | No           | NA       | NA            | 2           | NA           | NA                                              |
| MCL10   | 74  | F   | NA        | Elevated | Normal   | Normal                 | 5    | 3   | R-CHOP             | No   | No           | NA       | Initial       | 3           | NA           | Pneumonia                                       |
| MCL11   | 56  | M   | 40        | Normal   | Normal   | Normal                 | 6.5  | 5   | R-CHOP             | Yes  | No           | CR       | Initial       | 30          | NA           | NA                                              |
| MCL12   | 72  | F   | 40        | Elevated | Normal   | Normal                 | 7    | 2   | CHOP               | No   | No           | PR       | Initial       | 32          | NA           | Respiratory failure                             |
| MCL13   | 70  | M   | NA        | Elevated | Normal   | Normal                 | 8.6  | 2   | R-CHOP             | No   | Yes          | PR       | Relapse       | 30          | 10           | General weakness                                |
| MCL14   | 63  | F   | 70        | Elevated | Elevated | Normal                 | 7.3  | 3   | R-CHOP             | No   | Yes          | CR       | Relapse       | 27          | 22           | Plasma cell myeloma                             |
| MCL15   | 76  | M   | NA        | Normal   | Normal   | Normal                 | NA   | 3   | CVP                | No   | No           | PD       | Relapse       | 124         | 60           | NA                                              |
| MCL16   | 62  | M   | NA        | Normal   | Normal   | Normal                 | 8.4  | 1   | R-CHOP             | No   | Yes          | CR       | Relapse       | 157         | 153          | Gallbladder cancer with hepatic metastasis      |
| MCL17   | 55  | M   | NA        | Elevated | Elevated | Normal                 | NA   | 2   | R-hyper-CVAD       | No   | No           | PD       | Relapse       | 17          | 5            | NA                                              |
| MCL18   | 68  | M   | 10        | Normal   | Elevated | Normal                 | NA   | NA  | CVP                | No   | No           | NA       | NA            | 9           | NA           | Liver cirrhosis and gastric varix with bleeding |
| MCL20   | 50  | M   | NA        | Normal   | Normal   | Normal                 | 3    | 1   | R-hyper-CVAD       | Yes  | No           | CR       | Initial       | 106         | NA           | NA                                              |
| MCL21   | 67  | F   | 50        | Normal   | Normal   | Normal                 | 6.6  | 1   | DHAP               | No   | No           | CR       | Relapse       | 16          | 9            | Pneumonia                                       |
| MCL22   | 67  | F   | NA        | Elevated | Elevated | Normal                 | 5    | 4   | R-CHOP             | No   | No           | PD       | Relapse       | 9           | 8            | NA                                              |
| MCL23   | 69  | F   | 90        | Normal   | Elevated | Normal                 | 5    | NA  | R-CHOP             | No   | No           | CR       | Initial       | 11          | NA           | Pneumonia                                       |

|       |    |   |    |          |          |                                |     |    |              |     |     |    |         |    |    |                            |
|-------|----|---|----|----------|----------|--------------------------------|-----|----|--------------|-----|-----|----|---------|----|----|----------------------------|
| MCL24 | 49 | M | 20 | Normal   | Elevated | Normal                         | NA  | NA | R-CHOP       | No  | No  | SD | Relapse | 56 | 20 | NA                         |
| MCL25 | 62 | M | 5  | Elevated | Elevated | t(11;14)<br>(q13;q3+8;t(8;14)) | NA  | NA | R-CHOP       | No  | No  | SD | Relapse | 47 | NA | NA                         |
| MCL26 | 75 | M | NA | Elevated | Elevated | Normal                         | 9.3 | 4  | R-CHOP       | No  | No  | PD | Relapse | 20 | 19 | Recurrent pleural effusion |
| MCL28 | 58 | M | 60 | Normal   | Elevated | Normal                         | 7.1 | 0  | CHOP         | No  | No  | CR | Initial | 40 | NA | NA                         |
| MCL29 | 76 | M | 70 | Normal   | Normal   | t(11;14)<br>(q13;q3+8;t(8;14)) | 7.2 | 4  | FCM          | No  | No  | PD | Relapse | 21 | 13 | Pneumonia aggravation      |
| MCL30 | 49 | M | 60 | Elevated | Normal   | Normal                         | NA  | NA | R-CHOP       | No  | No  | CR | Relapse | 13 | 12 | NA                         |
| MCL31 | 40 | M | 10 | Normal   | Elevated | +8,t(8;14)                     | NA  | NA | No           | No  | No  | NA | NA      | 0  | NA | NA                         |
| MCL32 | 61 | M | NA | Normal   | Normal   | Normal                         | NA  | 2  | CHOP         | No  | No  | CR | Relapse | 59 | 85 | NA                         |
| MCL33 | 69 | F | 90 | Elevated | Elevated | Normal                         | 5   | 3  | R-CHOP       | No  | No  | NA | Initial | 11 | NA | Pneumonia                  |
| MCL34 | 71 | M | NA | Elevated | Elevated | Normal                         | 5   | 3  | R-CEOP       | No  | No  | NA | NA      | 7  | NA | NA                         |
| MCL35 | 69 | F | NA | Elevated | Normal   | Normal                         | 5   | 2  | CHOP         | No  | No  | PR | Relapse | 46 | 36 | Septic shock               |
| MCL36 | 58 | M | 30 | Normal   | Normal   | Normal                         | NA  | NA | R-hyper-CVAD | Yes | No  | CR | Relapse | 70 | 22 | NA                         |
| MCL37 | 59 | F | 40 | Normal   | Elevated | Normal                         | 4   | 3  | R-CHOP       | No  | No  | CR | Relapse | 29 | 20 | NA                         |
| MCL38 | 77 | M | 70 | Elevated | Normal   | t(11;14)<br>(q13;q3+8;t(8;14)) | 5.9 | 3  | VR-CAP       | No  | No  | CR | NA      | 10 | NA | NA                         |
| MCL39 | 77 | F | 20 | Normal   | Normal   | Normal                         | 6.7 | NA | R-CHOP       | No  | No  | CR | NA      | 34 | NA | NA                         |
| MCL40 | 55 | M | 35 | Elevated | Elevated | Normal                         | 5.6 | 2  | R-CHOP       | Yes | No  | PR | NA      | 6  | NA | NA                         |
| MCL41 | 62 | F | 30 | Normal   | Elevated | Normal                         | 2   | 3  | R-hyper-CVAD | Yes | No  | CR | Relapse | 36 | 17 | NA                         |
| MCL42 | 68 | M | 25 | Normal   | Normal   | Normal                         | 4   | 3  | R-CHOP       | No  | No  | NA | NA      | 0  | NA | NA                         |
| MCL43 | 72 | M | 2  | Normal   | Normal   | Normal                         | 5.9 | 3  | R-CHOP       | No  | Yes | CR | NA      | 71 | NA | NA                         |
| MCL44 | 61 | M | 10 | Elevated | Elevated | t(11;14)<br>(q13;q3+8;t(8;14)) | 6.3 | 3  | R-hyper-CVAD | No  | No  | CR | NA      | 36 | NA | NA                         |
| MCL45 | 62 | M | 15 | Normal   | Normal   | Normal                         | 5.6 | 3  | R-CHOP       | Yes | No  | PR | NA      | 83 | NA | NA                         |

|       |    |   |    |          |          |                                |     |   |              |     |    |    |         |    |    |               |
|-------|----|---|----|----------|----------|--------------------------------|-----|---|--------------|-----|----|----|---------|----|----|---------------|
| MCL46 | 70 | M | 10 | Elevated | Normal   | t(11;14)<br>(q13;q3+8;t(8;14)) | 5.7 | 3 | R-CHOP       | No  | No | PR | NA      | 44 | NA | NA            |
| MCL47 | 62 | F | 2  | Normal   | Normal   | Normal                         | 5   | 2 | B-R          | No  | No | CR | NA      | 56 | NA | NA            |
| MCL48 | 57 | M | 80 | Normal   | Elevated | Normal                         | 5   | 1 | R-hyper-CVAD | No  | No | CR | Initial | 20 | NA | Liver failure |
| MCL49 | 60 | M | NA | Elevated | Normal   | Normal                         | NA  | 3 | R-CHOP       | No  | No | NA | Relapse | 68 | 56 | NA            |
| MCL50 | 73 | F | 60 | Normal   | Elevated | Normal                         | 5   | 3 | R-CHOP       | No  | No | NA | Initial | 16 | NA | NA            |
| MCL51 | 54 | F | 40 | Normal   | Normal   | Normal                         | 5.3 | 1 | R-CHOP       | Yes | No | CR | NA      | 92 | NA | NA            |
| MCL52 | 70 | M | 50 | Elevated | Normal   | Normal                         | 5.7 | 2 | B-R          | No  | No | CR | NA      | 51 | NA | NA            |
| MCL53 | 58 | M | 10 | Elevated | Normal   | Normal                         | 5.4 | 2 | R-hyper-CVAD | No  | No | PR | NA      | 50 | NA | NA            |

**Supplementary Table S1.** Clinical data and sample information of mantle cell lymphoma patients in our cohort. \*B-R, bendamustine, and rituximab; CHOP, cyclophosphamide, doxorubicin, vincristine, and prednisolone; CVP, cyclophosphamide, vincristine, and prednisolone; DHAP, dexamethasone, high-dose ara-C cytarabine, and cisplatin; FCM, fludarabine, cyclophosphamide, and mitoxantrone; R-CEOP, rituximab, cyclophosphamide, etoposide, and prednisolone; R-CHOP, rituximab, cyclophosphamide, doxorubicin, vincristine, and prednisolone; R-hyper CVAD rituximab, cyclophosphamide, doxorubicin, vincristine, and dexamethasone alternating with rituximab plus high-dose methotrexate and cytarabine; VR-CAP, rituximab, bortezomib, cyclophosphamide, vincristine, and prednisone. ASCT, autologous stem cell transplantation; CR, complete remission; IPI, international prognostic index; LDH, lactate dehydrogenase; MG, macroglobulin; MIPI, mantle cell lymphoma international prognostic index; NA, not applicable; OS, overall survival; PD, progressive disease; PFS, progression free survival; PR, partial remission; SD, stable disease.

| Variable                     | Kridel et al. 2012 | Beà et al. 2013   | Greiner et al. 2006            | Zhang et al. 2014 | Rahal et al. 2014                     | Meissner et al. 2013 | Rossi et al. 2013 | Yang et al. 2018 | Ferrero et al. 2019                                       | Our study |
|------------------------------|--------------------|-------------------|--------------------------------|-------------------|---------------------------------------|----------------------|-------------------|------------------|-----------------------------------------------------------|-----------|
| Studied number               | 108                | 29/172            | 92                             | 56                | 165                                   | 102                  | 151               | 16               | 300                                                       | 53        |
| Age, mean years              | 65                 | 67/66             | NA                             | NA                | NA                                    | 64                   | < 65              | 63               | 18-65                                                     | 63        |
| Treatment with rituximab (%) | 46                 | 73/40             | NA                             | NA                | NA                                    | NA                   | 100               | 81               | 100                                                       | 82        |
| Studied country              | Canada             | Germany and Spain | Norway, Spain, Canada, and USA | USA               | Germany, Switzerland, Canada, and USA | Canada               | Italy             | China            | Denmark, Italy, Norway, Portugal, Sweden, and Switzerland | Korea     |
| Mutation frequency (%)       |                    |                   |                                |                   |                                       |                      |                   |                  |                                                           |           |
| <i>ATM</i>                   | 15                 | 41                | 56                             | 42                | 50                                    | 50                   | 42                | 38               | 42                                                        | 34        |
| <i>BIRC3</i>                 |                    | 6                 |                                | 9                 | 8                                     |                      | 5                 |                  | 6                                                         | 11        |
| <i>CCND1</i>                 | 19                 | 35                |                                | 16                | 19                                    | 19                   | 14                | 19               | 12                                                        | 13        |
| <i>KMT2D</i>                 |                    | 14                |                                | 20                |                                       |                      | 12                |                  | 12                                                        | 32        |
| <i>NOTCH1</i>                | 12                 | 5                 |                                | 14                | 14                                    | 14                   | 6                 |                  | 8                                                         | 11        |
| <i>TP53</i>                  | 25                 |                   | 26                             | 20                | 14                                    | 14                   | 7                 | 31               | 8                                                         | 17        |
| <i>TRAF2</i>                 |                    |                   |                                |                   | 7                                     |                      | 1                 |                  | 1                                                         | 6         |
| <i>UBR5</i>                  |                    |                   |                                | 7                 | 18                                    | 18                   |                   |                  |                                                           | 9         |
| <i>WHSC1</i>                 |                    | 10                | 7                              |                   |                                       |                      | 13                | 31               | 17                                                        | 13        |

**Supplementary Table S2.** Comparison with other mantle cell lymphoma studies for recurrently mutated genes.



| Pathway name                                                           | Entities |        |                 |       | Reactions |        |
|------------------------------------------------------------------------|----------|--------|-----------------|-------|-----------|--------|
|                                                                        | Found    | Ratio  | <i>P</i> -value | FDR   | Found     | Ratio  |
| Regulation of TP53 expression                                          | 2/4      | <0.001 | <0.001          | 0.003 | 5/5       | <0.001 |
| TP53 regulates transcription of DNA repair genes                       | 4/89     | 0.006  | <0.001          | 0.003 | 15/17     | 0.001  |
| Regulation of TP53 expression and degradation                          | 3/46     | 0.003  | <0.001          | 0.008 | 19/35     | 0.003  |
| Transcriptional regulation by TP53                                     | 6/485    | 0.034  | <0.001          | 0.019 | 177/259   | 0.021  |
| Regulation of TP53 activity                                            | 4/178    | 0.013  | <0.001          | 0.019 | 68/98     | 0.008  |
| Generic transcription pathway                                          | 10/1,524 | 0.108  | <0.001          | 0.020 | 196/811   | 0.066  |
| TP53 regulates transcription of caspase activators and caspases        | 2/20     | 0.001  | <0.001          | 0.023 | 13/17     | 0.001  |
| Regulation of TP53 activity through phosphorylation                    | 3/95     | 0.007  | <0.001          | 0.023 | 24/26     | 0.002  |
| Regulation of TP53 activity through methylation                        | 2/23     | 0.002  | 0.001           | 0.023 | 9/12      | <0.001 |
| RNA polymerase II transcription                                        | 10/1,663 | 0.117  | 0.001           | 0.024 | 196/872   | 0.071  |
| TP53 regulates transcription of genes involved in cytochrome C release | 2/33     | 0.002  | 0.002           | 0.038 | 21/25     | 0.002  |
| Gene expression (transcription)                                        | 10/1,821 | 0.129  | 0.002           | 0.038 | 196/983   | 0.081  |
| Activation of BH3-only proteins                                        | 2/36     | 0.003  | 0.003           | 0.038 | 5/19      | 0.002  |
| Regulation of TP53 degradation                                         | 2/43     | 0.003  | 0.004           | 0.048 | 14/30     | 0.002  |
| Deactivation of the beta-catenin transactivating complex               | 2/44     | 0.003  | 0.004           | 0.048 | 3/14      | 0.001  |
| PKMTs methylate histone lysines                                        | 2/49     | 0.003  | 0.005           | 0.055 | 3/22      | 0.002  |
| Autodegradation of the E3 ubiquitin ligase COP1                        | 2/54     | 0.004  | 0.006           | 0.065 | 2/5       | <0.001 |
| Stabilization of p53                                                   | 2/59     | 0.004  | 0.007           | 0.065 | 10/15     | 0.001  |
| Intrinsic pathway for apoptosis                                        | 2/59     | 0.004  | 0.007           | 0.065 | 5/60      | 0.005  |

|                                                                                                           |      |        |       |       |       |        |
|-----------------------------------------------------------------------------------------------------------|------|--------|-------|-------|-------|--------|
| Recruitment and ATM-mediated phosphorylation of repair and signaling proteins at DNA double strand breaks | 2/66 | 0.005  | 0.008 | 0.067 | 31/35 | 0.003  |
| Regulation of cortical dendrite branching                                                                 | 1/4  | <0.001 | 0.008 | 0.067 | 2/2   | <0.001 |
| Formation of the beta-catenin:TCF transactivating complex                                                 | 2/67 | 0.005  | 0.008 | 0.067 | 13/13 | 0.001  |
| p53-dependent G1 DNA damage response                                                                      | 2/70 | 0.005  | 0.009 | 0.067 | 13/22 | 0.002  |
| p53-dependent G1/S DNA damage checkpoint                                                                  | 2/70 | 0.005  | 0.009 | 0.067 | 13/22 | 0.002  |
| DNA damage/telomere stress induced senescence                                                             | 2/71 | 0.005  | 0.009 | 0.067 | 11/18 | 0.001  |

**Supplementary Table S3.** Most significant 25 pathways sorted by *P*-values. FDR, false discovery rate.

| Gene name      |                |                 |                |                |                |                 |                |                 |                |                 |                |
|----------------|----------------|-----------------|----------------|----------------|----------------|-----------------|----------------|-----------------|----------------|-----------------|----------------|
| <i>ABCA13</i>  | <i>BCL2L11</i> | <i>CEBPA</i>    | <i>DNAJC6*</i> | <i>FBXW7</i>   | <i>IDH2</i>    | <i>LGALS16</i>  | <i>MYO18A</i>  | <i>PDLIM3*</i>  | <i>RELN*</i>   | <i>SLC3A2</i>   | <i>TNFSF9</i>  |
| <i>ABCA3</i>   | <i>BCL6*</i>   | <i>CHD1</i>     | <i>DNMT3A</i>  | <i>FES</i>     | <i>IFNA14</i>  | <i>LIFR</i>     | <i>MYOM2</i>   | <i>PDZD7</i>    | <i>RERE</i>    | <i>SLITRK2</i>  | <i>TNRC6B*</i> |
| <i>ABCA6</i>   | <i>BCL7A</i>   | <i>CHD2</i>     | <i>DNMT3B</i>  | <i>FGFR1</i>   | <i>IFNA4</i>   | <i>LMCD1</i>    | <i>NAV3</i>    | <i>PER1</i>     | <i>REV3L</i>   | <i>SLITRK3</i>  | <i>TOP2A</i>   |
| <i>ABCA7*</i>  | <i>BCL9</i>    | <i>CHD8</i>     | <i>DOCK4</i>   | <i>FGL2</i>    | <i>IGLL5*</i>  | <i>LRIG3</i>    | <i>NBN</i>     | <i>PHF6</i>     | <i>RFTN1</i>   | <i>SLITRK5</i>  | <i>TP53*</i>   |
| <i>ABCC9*</i>  | <i>BCOR</i>    | <i>CHEK1*</i>   | <i>DOCK8</i>   | <i>FIGN</i>    | <i>IKBKB*</i>  | <i>LRP1B*</i>   | <i>NCOR1</i>   | <i>PHLPP1</i>   | <i>RGS4*</i>   | <i>SLITRK6</i>  | <i>TRAF2*</i>  |
| <i>ABL1*</i>   | <i>BCORL1</i>  | <i>CHEK2*</i>   | <i>DPCR1</i>   | <i>FLG</i>     | <i>IKZF1</i>   | <i>LRRK1*</i>   | <i>NCOR2*</i>  | <i>PIAS2</i>    | <i>RGS7</i>    | <i>SMARCA2</i>  | <i>TRAF3*</i>  |
| <i>ACAD9</i>   | <i>BCR</i>     | <i>CHKB</i>     | <i>DPPA2</i>   | <i>FLT3</i>    | <i>IKZF3</i>   | <i>LRRN3</i>    | <i>NELL2</i>   | <i>PIGN</i>     | <i>RHBDD1</i>  | <i>SMARCA4*</i> | <i>TRIML2</i>  |
| <i>ACTB*</i>   | <i>BIRC3*</i>  | <i>CHMP4C</i>   | <i>DSC1</i>    | <i>FLT4</i>    | <i>IL2RB</i>   | <i>LRTM1*</i>   | <i>NF1*</i>    | <i>PIK3CB</i>   | <i>RHOA</i>    | <i>SMC1A</i>    | <i>TRPM6</i>   |
| <i>ACTG1</i>   | <i>BLM</i>     | <i>CHPF2</i>    | <i>DSEL</i>    | <i>FLYWCH1</i> | <i>IL6</i>     | <i>LUZP4</i>    | <i>NFKBIA</i>  | <i>PIK3CD</i>   | <i>RIMS2*</i>  | <i>SMC3</i>     | <i>TRRAP*</i>  |
| <i>ACTN2</i>   | <i>BRAF</i>    | <i>CHST9</i>    | <i>DST</i>     | <i>FOXO1</i>   | <i>IL6R</i>    | <i>LYN</i>      | <i>NFKBIE*</i> | <i>PIK3R1</i>   | <i>RIPK1</i>   | <i>SMYD1</i>    | <i>TSHZ2</i>   |
| <i>ACTN3</i>   | <i>BRCA2*</i>  | <i>CHSY3*</i>   | <i>DTX1</i>    | <i>FOXP1</i>   | <i>IL7R</i>    | <i>MAGT1</i>    | <i>NFKBIZ</i>  | <i>PIM1</i>     | <i>RIPK2</i>   | <i>SNX29</i>    | <i>TTC27</i>   |
| <i>ACTN4</i>   | <i>BRCC3</i>   | <i>CIITA</i>    | <i>DUSP2</i>   | <i>FTCD</i>    | <i>IQCG</i>    | <i>MAML1</i>    | <i>NIN*</i>    | <i>PKD1*</i>    | <i>RNF213</i>  | <i>SOCS1</i>    | <i>TUBB</i>    |
| <i>ADD2</i>    | <i>BRD2</i>    | <i>CLCN6</i>    | <i>DYNC1H1</i> | <i>FUBP1</i>   | <i>IRF2BP1</i> | <i>MAP1B*</i>   | <i>NIPBL</i>   | <i>PKHD1L1*</i> | <i>RNF40</i>   | <i>SOHLH2</i>   | <i>TYK2</i>    |
| <i>ADGRL2</i>  | <i>BRD4</i>    | <i>CLGN</i>     | <i>DYRK1A</i>  | <i>FYB</i>     | <i>IRF4</i>    | <i>MAP2</i>     | <i>NLRC5</i>   | <i>PKM</i>      | <i>ROBO2*</i>  | <i>SP140*</i>   | <i>TYRP1</i>   |
| <i>ADGRV1</i>  | <i>BRINP2</i>  | <i>CMYA5</i>    | <i>EBF1*</i>   | <i>GATA1</i>   | <i>IRF8</i>    | <i>MAP2K1</i>   | <i>NOA1</i>    | <i>PLCG1</i>    | <i>RP1</i>     | <i>SPEN*</i>    | <i>U2AF1</i>   |
| <i>AFAP1L2</i> | <i>BRIP1</i>   | <i>CNKSR2</i>   | <i>ECT2L</i>   | <i>GATA2</i>   | <i>ITK</i>     | <i>MAP3K14*</i> | <i>NOL9</i>    | <i>PLCG2</i>    | <i>RP1L1</i>   | <i>SPINK13</i>  | <i>U2AF2*</i>  |
| <i>AFF2</i>    | <i>BTG1</i>    | <i>COL11A1*</i> | <i>EEF1A1</i>  | <i>GLI3</i>    | <i>ITPKB</i>   | <i>MAPK1</i>    | <i>NOTCH1*</i> | <i>PLEKHG1</i>  | <i>RPS15</i>   | <i>SRRM2</i>    | <i>UBE2A</i>   |
| <i>AKT1</i>    | <i>BTG2</i>    | <i>COL11A2</i>  | <i>EEF1E1</i>  | <i>GLIS3</i>   | <i>ITPR1</i>   | <i>MBD1</i>     | <i>NOTCH2*</i> | <i>PLEKHG5</i>  | <i>RPS6KA1</i> | <i>SRSF2</i>    | <i>UBR5*</i>   |
| <i>ALDH7A1</i> | <i>BTK</i>     | <i>COL14A1*</i> | <i>EGR2</i>    | <i>GNA13</i>   | <i>ITPR2</i>   | <i>MCRS1</i>    | <i>NPAT</i>    | <i>PLXNA1</i>   | <i>RRAGC</i>   | <i>SRSF8</i>    | <i>ULK4</i>    |
| <i>ALMS1</i>   | <i>CA4</i>     | <i>COL16A1*</i> | <i>EIF2AK4</i> | <i>GNAS</i>    | <i>JAK1</i>    | <i>MED12</i>    | <i>NPM1</i>    | <i>PLXNB3*</i>  | <i>RUBCN</i>   | <i>STAG2</i>    | <i>USH1C</i>   |
| <i>ALPK2</i>   | <i>CACNA1E</i> | <i>COL4A2</i>   | <i>EIF4A1</i>  | <i>GNAT1</i>   | <i>JAK2</i>    | <i>MED23</i>    | <i>NPTX2</i>   | <i>PMS2</i>     | <i>RUNX1</i>   | <i>STARD8</i>   | <i>USP25</i>   |

|                 |                 |                |                |                  |                 |                |                 |                |                |                 |                |
|-----------------|-----------------|----------------|----------------|------------------|-----------------|----------------|-----------------|----------------|----------------|-----------------|----------------|
| <i>ANK2*</i>    | <i>CACNA2D3</i> | <i>COL6A3*</i> | <i>EIF4A2</i>  | <i>GNB1</i>      | <i>JAK3</i>     | <i>MEF2B*</i>  | <i>NRAS</i>     | <i>POLG</i>    | <i>RYR1*</i>   | <i>STAT3</i>    | <i>VAPA</i>    |
| <i>ANKRD17*</i> | <i>CAD*</i>     | <i>CPA4</i>    | <i>ELF4</i>    | <i>GON4L*</i>    | <i>KANK2</i>    | <i>MEF2C</i>   | <i>NRXN3</i>    | <i>POP1</i>    | <i>SIPRI*</i>  | <i>STAT5B</i>   | <i>VPSI3A</i>  |
| <i>ANKRD44</i>  | <i>CAMTA1</i>   | <i>CREBBP*</i> | <i>ELP2</i>    | <i>GPR37</i>     | <i>KAT6B</i>    | <i>MEIS1</i>   | <i>NSD1</i>     | <i>POSTN</i>   | <i>SIPR2</i>   | <i>STAT6*</i>   | <i>WAC</i>     |
| <i>AOC2</i>     | <i>CAPN1</i>    | <i>CREG2</i>   | <i>EMC8</i>    | <i>GPR65</i>     | <i>KCNC2*</i>   | <i>MFHAS1</i>  | <i>NXF1</i>     | <i>POT1</i>    | <i>SALL3</i>   | <i>STXBP2</i>   | <i>WAS</i>     |
| <i>APC*</i>     | <i>CARD11*</i>  | <i>CRYBG3*</i> | <i>EP300</i>   | <i>GPS2</i>      | <i>KCNH2</i>    | <i>MGA</i>     | <i>OCEL1</i>    | <i>PIIG</i>    | <i>SAMD9</i>   | <i>SUZ12</i>    | <i>WDR66</i>   |
| <i>AQP2</i>     | <i>CARD6*</i>   | <i>CSF1R</i>   | <i>EPHA3</i>   | <i>GRIA2</i>     | <i>KCNH6</i>    | <i>MGAM</i>    | <i>OGDHL</i>    | <i>PPM1D</i>   | <i>SAMHD1</i>  | <i>SWAP70</i>   | <i>WDR70</i>   |
| <i>ARHGAP28</i> | <i>CASP10</i>   | <i>CSF3R</i>   | <i>EPOR</i>    | <i>GRIN2A*</i>   | <i>KCNQ3</i>    | <i>MIB1</i>    | <i>OR10A2</i>   | <i>PPP1R9A</i> | <i>SBDS</i>    | <i>SYK</i>      | <i>WDR90</i>   |
| <i>ARHGAP32</i> | <i>CBL</i>      | <i>CTCF</i>    | <i>ERAP1</i>   | <i>GTSE1</i>     | <i>KDM4C*</i>   | <i>MIR142</i>  | <i>OR1S2</i>    | <i>PRAME</i>   | <i>SCG3</i>    | <i>SYNE1*</i>   | <i>WHAMM</i>   |
| <i>ARID1A*</i>  | <i>CCM2L</i>    | <i>CTNNA2</i>  | <i>ERG</i>     | <i>HDAC6</i>     | <i>KDM5C</i>    | <i>MKI67*</i>  | <i>OR5H1</i>    | <i>PRDM1*</i>  | <i>SCRIB</i>   | <i>TAF1</i>     | <i>WHSC1*</i>  |
| <i>ARID1B*</i>  | <i>CCND1*</i>   | <i>CUL1</i>    | <i>ESF1</i>    | <i>HEATR1</i>    | <i>KDM6A</i>    | <i>MKLN1</i>   | <i>P2RY8</i>    | <i>PRDM15</i>  | <i>SENP6</i>   | <i>TBC1D26*</i> | <i>WT1</i>     |
| <i>ARID2</i>    | <i>CCND3*</i>   | <i>CUL9</i>    | <i>ESX1</i>    | <i>HEPH*</i>     | <i>KDM6B</i>    | <i>MLH1</i>    | <i>PABPC1</i>   | <i>PRDM2*</i>  | <i>SETBP1</i>  | <i>TBLIXR1*</i> | <i>XPO1</i>    |
| <i>ARID5B*</i>  | <i>CCR4</i>     | <i>CXCR4</i>   | <i>ETS1</i>    | <i>HERC1</i>     | <i>KIAA0355</i> | <i>MMP8</i>    | <i>PABPC5</i>   | <i>PRF1</i>    | <i>SETD1A</i>  | <i>TBX3</i>     | <i>XPO4</i>    |
| <i>ASXL1</i>    | <i>CD14</i>     | <i>DAP3</i>    | <i>ETV6</i>    | <i>HFE2</i>      | <i>KIAA1671</i> | <i>MPDZ</i>    | <i>PALLD</i>    | <i>PRKCB</i>   | <i>SETD1B</i>  | <i>TCF12</i>    | <i>YLPM1*</i>  |
| <i>ATAD2B</i>   | <i>CD27</i>     | <i>DCAF4L2</i> | <i>EVI2A</i>   | <i>HIST1H1B</i>  | <i>KIR2DL4</i>  | <i>MPEG1</i>   | <i>PAMR1</i>    | <i>PRKD3</i>   | <i>SETD2*</i>  | <i>TCF3*</i>    | <i>YY1AP1</i>  |
| <i>ATM*</i>     | <i>CD274</i>    | <i>DCDC2B</i>  | <i>EWSR1</i>   | <i>HIST1H1C</i>  | <i>KIR3DL1</i>  | <i>MPL</i>     | <i>PASD1</i>    | <i>PROS1</i>   | <i>SETD6</i>   | <i>TCTN2</i>    | <i>ZBTB9</i>   |
| <i>ATMIN</i>    | <i>CD28</i>     | <i>DCDC5</i>   | <i>EXOSC6</i>  | <i>HIST1H1D</i>  | <i>KIT</i>      | <i>MRGPRF</i>  | <i>PASK</i>     | <i>PRPF40B</i> | <i>SF1</i>     | <i>TET1*</i>    | <i>ZEB1</i>    |
| <i>ATP10B*</i>  | <i>CD40LG</i>   | <i>DCP1B</i>   | <i>EZH2*</i>   | <i>HIST1H1E</i>  | <i>KLF2</i>     | <i>MSH2</i>    | <i>PAX6</i>     | <i>PTEN</i>    | <i>SF3A1</i>   | <i>TET2</i>     | <i>ZFH33*</i>  |
| <i>ATP11C</i>   | <i>CD58</i>     | <i>DDX3X</i>   | <i>FAM205A</i> | <i>HIST1H2AC</i> | <i>KLHDC8B</i>  | <i>MSH6</i>    | <i>PBXIP1</i>   | <i>PTGFRN</i>  | <i>SF3B1</i>   | <i>TFCP2</i>    | <i>ZFP36L1</i> |
| <i>ATP6AP1</i>  | <i>CD70</i>     | <i>DGKB*</i>   | <i>FAM46C</i>  | <i>HIST1H2AG</i> | <i>KLHL14</i>   | <i>MSL2</i>    | <i>PCBP1</i>    | <i>PTPN11</i>  | <i>SGK1</i>    | <i>TGM7*</i>    | <i>ZMYM3</i>   |
| <i>ATP6V1B2</i> | <i>CD79A</i>    | <i>DHCR7*</i>  | <i>FAM50A</i>  | <i>HIST1H2BC</i> | <i>KLHL6</i>    | <i>MSN</i>     | <i>PCDHB2</i>   | <i>PTPN14</i>  | <i>SH2B3</i>   | <i>THBS1</i>    | <i>ZNF117*</i> |
| <i>ATR</i>      | <i>CD79B</i>    | <i>DHDH</i>    | <i>FANCD2</i>  | <i>HIST1H2BD</i> | <i>KMT2A</i>    | <i>MTOR*</i>   | <i>PCDHGA12</i> | <i>PTPRCAP</i> | <i>SH2D1A</i>  | <i>TLN2</i>     | <i>ZNF296</i>  |
| <i>ATRX*</i>    | <i>CD83</i>     | <i>DIS3</i>    | <i>FAS*</i>    | <i>HIST1H2BG</i> | <i>KMT2C*</i>   | <i>MUC16*</i>  | <i>PCLO*</i>    | <i>PTPRD</i>   | <i>SI*</i>     | <i>TLR2</i>     | <i>ZNF429</i>  |
| <i>B2M</i>      | <i>CDC123</i>   | <i>DLC1*</i>   | <i>FASLG</i>   | <i>HIST1H2BK</i> | <i>KMT2D*</i>   | <i>MUM1</i>    | <i>PCSK2</i>    | <i>PTPRN</i>   | <i>SIN3A</i>   | <i>TMSB4X</i>   | <i>ZNF521</i>  |
| <i>BARD1</i>    | <i>CDH11</i>    | <i>DLEU2</i>   | <i>FAT1*</i>   | <i>HIVEP2</i>    | <i>KRAS</i>     | <i>MYBBP1A</i> | <i>PDCD11</i>   | <i>RAD21</i>   | <i>SLC13A3</i> | <i>TMTC2</i>    | <i>ZNF608</i>  |

|               |               |               |               |               |              |              |                 |               |                 |                  |               |
|---------------|---------------|---------------|---------------|---------------|--------------|--------------|-----------------|---------------|-----------------|------------------|---------------|
| <i>BAZ2A</i>  | <i>CDH23*</i> | <i>DLGAP2</i> | <i>FAT4*</i>  | <i>HOXB2*</i> | <i>LAMA2</i> | <i>MYC</i>   | <i>PDCD1LG2</i> | <i>RAG2</i>   | <i>SLC16A7</i>  | <i>TNFAIP3*</i>  | <i>ZNF708</i> |
| <i>BCL10*</i> | <i>CDH8*</i>  | <i>DMD</i>    | <i>FBXO11</i> | <i>HUWE1</i>  | <i>LAMB4</i> | <i>MYD88</i> | <i>PDCL</i>     | <i>RBI*</i>   | <i>SLC17A6</i>  | <i>TNFRSF13B</i> | <i>ZNF85</i>  |
| <i>BCL11B</i> | <i>CDKN2A</i> | <i>DMXL1</i>  | <i>FBXO21</i> | <i>ID3</i>    | <i>LCN2</i>  | <i>MYH11</i> | <i>PDGFC</i>    | <i>RBM23</i>  | <i>SLC29A2*</i> | <i>TNFRSF14*</i> | <i>ZNF90</i>  |
| <i>BCL2*</i>  | <i>CDKN2B</i> | <i>DNAH5</i>  | <i>FBXO42</i> | <i>IDH1</i>   | <i>LEP</i>   | <i>MYH9</i>  | <i>PDGFRB</i>   | <i>RBMXL3</i> | <i>SLC30A6</i>  | <i>TNFRSF1B</i>  | <i>ZRSR2*</i> |

**Supplementary Table S4.** The 588 gene list of targeted lymphoma panel set used for next-generation sequencing experiments. \*Genes identified by targeted panel sequencing and whole-exome sequencing concurrently.

| Sample | Average read depth | Coverage of target, >30X, % |
|--------|--------------------|-----------------------------|
| MCL1   | 86.8               | 96.7                        |
| MCL2   | 378                | 99.8                        |
| MCL3   | 259                | 99.7                        |
| MCL4   | 316.9              | 99.8                        |
| MCL5   | 123.5              | 97.7                        |
| MCL6   | 718                | 99.9                        |
| MCL7   | 507.4              | 99.9                        |
| MCL8   | 384.2              | 99.9                        |
| MCL9   | 381                | 97.3                        |
| MCL10  | 745.8              | 99.9                        |
| MCL11  | 119.8              | 95.0                        |
| MCL12  | 145.4              | 99.2                        |
| MCL13  | 365                | 99.7                        |
| MCL14  | 231.8              | 99.1                        |
| MCL15  | 197.9              | 98.1                        |
| MCL16  | 79.8               | 95.7                        |
| MCL17  | 126.6              | 96.5                        |
| MCL18  | 92.6               | 85.8                        |
| MCL19  | 145.1              | 93.2                        |
| MCL20  | 392.5              | 99.8                        |
| MCL21  | 93.6               | 94.2                        |

|       |        |      |
|-------|--------|------|
| MCL22 | 181.1  | 98.7 |
| MCL23 | 547.9  | 99.9 |
| MCL24 | 401.7  | 95.8 |
| MCL25 | 393.8  | 96.5 |
| MCL26 | 391.1  | 95.8 |
| MCL27 | 277.7  | 93   |
| MCL28 | 527.9  | 99.9 |
| MCL29 | 568.5  | 99.7 |
| MCL30 | 272.7  | 82.3 |
| MCL31 | 724    | 96.7 |
| MCL32 | 451.8  | 99.8 |
| MCL33 | 152.8  | 99.7 |
| MCL34 | 122.5  | 99.2 |
| MCL35 | 76.9   | 93.2 |
| MCL36 | 72.4   | 94.2 |
| MCL37 | 269.7  | 99.9 |
| MCL38 | 184.2  | 99.7 |
| MCL39 | 270.4  | 99.8 |
| MCL40 | 121.2  | 97.7 |
| MCL41 | 111.2  | 89.7 |
| MCL42 | 845.7  | 99.9 |
| MCL43 | 810.8  | 99.9 |
| MCL44 | 1000.5 | 99.9 |
| MCL45 | 844    | 99.9 |

|       |       |      |
|-------|-------|------|
| MCL46 | 712.9 | 99.9 |
| MCL47 | 322   | 99.8 |
| MCL48 | 458.2 | 99.9 |
| MCL49 | 121.2 | 99.6 |
| MCL50 | 539.8 | 96.7 |
| MCL51 | 584   | 99.9 |
| MCL52 | 704.1 | 99.9 |
| MCL53 | 441.5 | 99.9 |

**Supplementary Table S5.** Read depth and coverage of targeted lymphoma panel sequencing.



| Sample | Average read depth | Coverage of target, >30X, % |
|--------|--------------------|-----------------------------|
| MCL8   | 145.2              | 40.7                        |
| MCL8C  | 159.9              | 43.7                        |
| MCL41  | 151.7              | 26.3                        |
| MCL41C | 146.5              | 45.5                        |
| MCL50  | 154.4              | 40.1                        |
| MCL50C | 132.4              | 45.2                        |
| MCL18  | 131.0              | 27.0                        |
| MCL12  | 142.8              | 24.9                        |
| MCL6   | 137.9              | 37.5                        |
| MCL4   | 139.7              | 34.8                        |
| MCL26  | 136.0              | 33.5                        |
| MCL7   | 144.8              | 32.7                        |
| MCL29  | 159.7              | 31.3                        |
| MCL37  | 133.9              | 39.3                        |
| MCL11  | 125.5              | 42.3                        |
| MCL49C | 161.8              | 47.5                        |

**Supplementary Table S6.** Read depth and coverage of whole-exome sequencing.

| Sample | Gene           | HGVS cDNA           | HGVS protein       | VAF   | Total depth | Variant depth | SIFT_prediction | Polyphen2_prediction | Method |
|--------|----------------|---------------------|--------------------|-------|-------------|---------------|-----------------|----------------------|--------|
| MCL1   | <i>CXCR4</i>   | c.1034_1035delAG    | p.Glu345ValfsTer12 | 0.400 | 55          | 22            |                 |                      | TPS    |
| MCL1   | <i>KDM6A</i>   | c.514C>T            | p.Arg172Ter        | 0.148 | 54          | 8             |                 |                      | TPS    |
| MCL1   | <i>ACTB</i>    | c.826G>A            | p.Glu276Lys        | 0.214 | 28          | 6             |                 | B                    | TPS    |
| MCL1   | <i>ARID2</i>   | c.2428G>C           | p.Ala810Pro        | 0.545 | 55          | 30            | D               | B                    | TPS    |
| MCL1   | <i>EZH2</i>    | c.638G>A            | p.Arg213His        | 0.500 | 134         | 67            | T               | B                    | TPS    |
| MCL1   | <i>FOXP1</i>   | c.174_176delGCA     | p.Gln60del         | 0.100 | 90          | 9             |                 |                      | TPS    |
| MCL1   | <i>ABCA13</i>  | c.12242_12244delAGG | p.Glu4081del       | 0.114 | 35          | 4             |                 |                      | TPS    |
| MCL1   | <i>DNAJC6</i>  | c.473C>T            | p.Ser158Leu        | 0.163 | 43          | 7             | D               | D                    | TPS    |
| MCL1   | <i>LRP1B</i>   | c.3799C>T           | p.Arg1267Cys       | 0.143 | 56          | 8             | D               | D                    | TPS    |
| MCL1   | <i>SETD2</i>   | c.4997A>G           | p.Tyr1666Cys       | 0.622 | 90          | 56            | D               | D                    | TPS    |
| MCL1   | <i>CTNNA2</i>  | c.2397G>T           | p.Lys799Asn        | 0.403 | 72          | 29            | D               | B                    | TPS    |
| MCL1   | <i>COL11A2</i> | c.2650C>T           | p.Pro884Ser        | 0.233 | 30          | 7             | D               | B                    | TPS    |
| MCL1   | <i>SYNE1</i>   | c.9691C>T           | p.His3231Tyr       | 0.656 | 64          | 42            | T               | B                    | TPS    |
| MCL1   | <i>SYNE1</i>   | c.5476G>A           | p.Glu1826Lys       | 0.325 | 77          | 25            | T               | P                    | TPS    |
| MCL1   | <i>SYNE1</i>   | c.1381C>A           | p.Gln461Lys        | 0.111 | 54          | 6             | T               | B                    | TPS    |
| MCL1   | <i>RIMS2</i>   | c.1693-18G>T        |                    | 0.154 | 26          | 4             |                 |                      | TPS    |
| MCL1   | <i>PKHD1L1</i> | c.9090-3C>T         |                    | 0.238 | 21          | 5             |                 |                      | TPS    |
| MCL1   | <i>CREG2</i>   | c.502A>G            | p.Thr168Ala        | 0.496 | 111         | 55            | D               | D                    | TPS    |
| MCL1   | <i>SYNE1</i>   | c.5585A>T           | p.Glu1862Val       | 0.563 | 64          | 36            | D               | D                    | TPS    |
| MCL1   | <i>SYNE1</i>   | c.5584G>A           | p.Glu1862Lys       | 0.587 | 63          | 37            | D               | D                    | TPS    |
| MCL1   | <i>RBMXL3</i>  | c.818G>A            | p.Arg273His        | 0.952 | 42          | 40            | T               | D                    | TPS    |
| MCL2†  | <i>KMT2D</i>   | c.11713C>T          | p.Gln3905Ter       | 0.185 | 146         | 27            |                 |                      | TPS    |
| MCL2†  | <i>EZH2</i>    | c.1936T>A           | p.Tyr646Asn        | 0.179 | 507         | 91            | D               | D                    | TPS    |

|       |                |            |                    |       |     |     |   |   |     |
|-------|----------------|------------|--------------------|-------|-----|-----|---|---|-----|
| MCL2† | <i>JAK1</i>    | c.3230dupA | p.Tyr1077Ter       | 0.171 | 551 | 94  |   |   | TPS |
| MCL2† | <i>PRDM1</i>   | c.1551delC | p.Thr518ArgfsTer30 | 0.201 | 189 | 38  |   |   | TPS |
| MCL2† | <i>KCNH6</i>   | c.2314delG | p.Ala772GlnfsTer15 | 0.424 | 59  | 25  |   |   | TPS |
| MCL2† | <i>NCOR2</i>   | c.705+4T>C |                    | 0.448 | 451 | 202 |   |   | TPS |
| MCL2† | <i>TMSB4X</i>  | c.100+5G>C |                    | 0.365 | 249 | 91  |   |   | TPS |
| MCL2† | <i>FLYWCH1</i> | c.49G>A    | p.Gly17Ser         | 0.551 | 450 | 248 | T | B | TPS |
| MCL2† | <i>DHDH</i>    | c.487C>T   | p.Arg163Trp        | 0.525 | 198 | 104 | D | D | TPS |
| MCL2† | <i>IGLL5</i>   | c.115C>G   | p.Leu39Val         | 0.176 | 238 | 42  | D | B | TPS |
| MCL2† | <i>CRYBG3</i>  | c.127G>T   | p.Ala43Ser         | 0.415 | 323 | 134 |   | D | TPS |
| MCL2† | <i>CRYBG3</i>  | c.1511C>G  | p.Thr504Arg        | 0.559 | 426 | 238 |   | D | TPS |
| MCL2† | <i>CRYBG3</i>  | c.3268A>C  | p.Lys1090Gln       | 0.507 | 505 | 256 |   | B | TPS |
| MCL2† | <i>CHSY3</i>   | c.1220A>G  | p.Asn407Ser        | 0.454 | 205 | 93  | T | B | TPS |
| MCL2† | <i>LAMB4</i>   | c.1985C>T  | p.Ala662Val        | 0.485 | 328 | 159 | T | P | TPS |
| MCL3* | <i>TET2</i>    | c.1630C>T  | p.Arg544Ter        | 0.227 | 357 | 81  |   |   | TPS |
| MCL3* | <i>TET2</i>    | c.1530delA | p.Glu510AspfsTer23 | 0.191 | 236 | 45  |   |   | TPS |
| MCL3* | <i>BARD1</i>   | c.258T>A   | p.Cys86Ter         | 0.463 | 229 | 106 |   |   | TPS |
| MCL3* | <i>COL6A3</i>  | c.5642G>A  | p.Arg1881His       | 0.466 | 706 | 329 | D | D | TPS |
| MCL3* | <i>TET1</i>    | c.3941C>T  | p.Ala1314Val       | 0.426 | 237 | 101 | D | B | TPS |
| MCL3* | <i>KMT2A</i>   | c.137T>G   | p.Val46Gly         | 0.350 | 20  | 7   | T | B | TPS |
| MCL3* | <i>YLPM1</i>   | c.3792G>T  | p.Trp1264Cys       | 0.508 | 370 | 188 |   | D | TPS |
| MCL3* | <i>COL16A1</i> | c.3451G>A  | p.Asp1151Asn       | 0.429 | 77  | 33  | T | D | TPS |
| MCL3* | <i>TLN2</i>    | c.161C>T   | p.Ser54Leu         | 0.450 | 218 | 98  | T | D | TPS |
| MCL3* | <i>HERC1</i>   | c.7654G>A  | p.Val2552Ile       | 0.467 | 368 | 172 | T | B | TPS |
| MCL3* | <i>LRRK1</i>   | c.1805C>T  | p.Thr602Ile        | 0.475 | 221 | 105 | T | B | TPS |

|       |                |                  |                     |       |      |     |   |   |     |
|-------|----------------|------------------|---------------------|-------|------|-----|---|---|-----|
| MCL3* | <i>NCOR1</i>   | c.1670C>T        | p.Thr557Ile         | 0.394 | 378  | 149 | T | B | TPS |
| MCL3* | <i>CRYBG3</i>  | c.7542C>G        | p.His2514Gln        | 0.449 | 325  | 146 |   | B | TPS |
| MCL3* | <i>SYNE1</i>   | c.14669C>T       | p.Ala4890Val        | 0.371 | 175  | 65  | D | B | TPS |
| MCL3* | <i>PCLO</i>    | c.5891C>T        | p.Thr1964Met        | 0.305 | 154  | 47  | D | P | TPS |
| MCL4  | <i>KMT2D</i>   | c.4747delC       | p.Gln1583SerfsTer10 | 0.297 | 583  | 173 |   |   | TPS |
| MCL4  | <i>NFKBIE</i>  | c.759_762delTTAC | p.Tyr254SerfsTer13  | 0.141 | 1065 | 150 |   |   | TPS |
| MCL4  | <i>ATM</i>     | c.7336G>A        | p.Glu2446Lys        | 0.365 | 126  | 46  | T | D | TPS |
| MCL4  | <i>ATM</i>     | c.7340T>C        | p.Leu2447Ser        | 0.394 | 132  | 52  | D | D | TPS |
| MCL4  | <i>TGM7</i>    | c.404G>A         | p.Gly135Glu         | 0.468 | 77   | 36  | D | D | TPS |
| MCL4  | <i>PKD1</i>    | c.2102C>A        | p.Thr701Asn         | 0.212 | 353  | 75  | T | P | TPS |
| MCL4  | <i>UBR5</i>    | c.8187+3A>T      |                     | 0.296 | 135  | 40  |   |   | TPS |
| MCL4  | <i>CAD</i>     | c.2576C>T        | p.Pro859Leu         | 0.483 | 656  | 317 | D | P | TPS |
| MCL4  | <i>SLC29A2</i> | c.1291G>A        | p.Gly431Ser         | 0.431 | 390  | 168 | D | D | TPS |
| MCL4  | <i>KMT2D</i>   | c.4682T>G        | p.Val1561Gly        | 0.498 | 319  | 159 | T | B | TPS |
| MCL4  | <i>NIN</i>     | c.5039A>C        | p.Lys1680Thr        | 0.582 | 134  | 78  | D | D | TPS |
| MCL4  | <i>LRRK1</i>   | c.4332+5G>A      |                     | 0.292 | 298  | 87  |   |   | TPS |
| MCL4  | <i>CDH8</i>    | c.2084T>C        | p.Leu695Ser         | 0.538 | 117  | 63  | T | B | TPS |
| MCL4  | <i>ANKRD44</i> | c.1316+4T>C      |                     | 0.514 | 210  | 108 |   |   | TPS |
| MCL4  | <i>ABCA13</i>  | c.9200A>G        | p.Asp3067Gly        | 0.518 | 85   | 44  | D | B | TPS |
| MCL4  | <i>ATM</i>     | c.7336G>A        | p.Glu2446Lys        | 0.465 | 43   | 20  | T | D | WES |
| MCL4  | <i>ATM</i>     | c.7340T>C        | p.Leu2447Ser        | 0.457 | 46   | 21  | D | D | WES |
| MCL4  | <i>BCL10</i>   | c.657T>G         | p.Ser219Arg         | 0.143 | 35   | 5   | D | P | WES |
| MCL4  | <i>BRCA2</i>   | c.7835C>A        | p.Pro2612Gln        | 0.108 | 37   | 4   | D | D | WES |
| MCL4  | <i>CAD</i>     | c.2576C>T        | p.Pro859Leu         | 0.438 | 258  | 113 | D | P | WES |

|      |                |                       |                     |       |     |    |   |   |     |
|------|----------------|-----------------------|---------------------|-------|-----|----|---|---|-----|
| MCL4 | <i>CDH8</i>    | c.2084T>C             | p.Leu695Ser         | 0.600 | 45  | 27 | T | B | WES |
| MCL4 | <i>DLC1</i>    | c.762_763delinsCG     | p.GlnAsn254HisAsp   | 0.417 | 24  | 10 |   |   | WES |
| MCL4 | <i>IGF2BP2</i> | c.1201G>A             | p.Gly401Arg         | 0.160 | 25  | 4  | D | D | WES |
| MCL4 | <i>KMT2C</i>   | c.943_946delinsAGCT   | p.GlyThr315SerSer   | 0.108 | 307 | 33 |   |   | WES |
| MCL4 | <i>KMT2D</i>   | c.4747del             | p.Gln1583SerfsTer10 | 0.288 | 177 | 51 |   |   | WES |
| MCL4 | <i>KMT2D</i>   | c.4682T>G             | p.Val1561Gly        | 0.511 | 88  | 45 | T | B | WES |
| MCL4 | <i>LRRK1</i>   | c.5813_5814delinsAA   | p.Gly1938Glu        | 0.419 | 179 | 75 |   |   | WES |
| MCL4 | <i>MPDZ</i>    | c.2810C>T             | p.Ala937Val         | 0.471 | 17  | 8  | T | B | WES |
| MCL4 | <i>NFKBIE</i>  | c.759_762del          | p.Tyr254SerfsTer13  | 0.191 | 314 | 60 |   |   | WES |
| MCL4 | <i>NIN</i>     | c.5039A>C             | p.Lys1680Thr        | 0.482 | 85  | 41 | D | D | WES |
| MCL4 | <i>ROBO2</i>   | c.73_75delinsATC      | p.Val25Ile          | 0.205 | 88  | 18 |   |   | WES |
| MCL4 | <i>SLC29A2</i> | c.1291G>A             | p.Gly431Ser         | 0.471 | 85  | 40 | D | D | WES |
| MCL4 | <i>SPEN</i>    | c.7135G>A             | p.Glu2379Lys        | 0.103 | 39  | 4  | D | D | WES |
| MCL4 | <i>TGM7</i>    | c.404G>A              | p.Gly135Glu         | 0.452 | 31  | 14 | D | D | WES |
| MCL4 | <i>TUBA1B</i>  | c.859T>A              | p.Ser287Thr         | 0.236 | 55  | 13 |   | B | WES |
| MCL4 | <i>ZNF117</i>  | c.566A>G              | p.Glu189Gly         | 0.222 | 18  | 4  | T | B | WES |
| MCL5 | <i>SAMHD1</i>  | c.490C>T              | p.Arg164Ter         | 0.516 | 64  | 33 |   |   | TPS |
| MCL5 | <i>KMT2A</i>   | c.5941delC            | p.Arg1981GlyfsTer3  | 0.097 | 62  | 6  |   |   | TPS |
| MCL5 | <i>HERC1</i>   | c.5526_5527delGG      | p.Asp1843SerfsTer4  | 0.092 | 65  | 6  |   |   | TPS |
| MCL5 | <i>KDM6B</i>   | c.2281_2287delACCACGG | p.Thr761ProfsTer19  | 0.092 | 109 | 10 |   |   | TPS |
| MCL5 | <i>ADGRV1</i>  | c.1525C>T             | p.Gln509Ter         | 0.182 | 55  | 10 |   |   | TPS |
| MCL5 | <i>PPP1R9A</i> | c.3920delG            | p.Gly1307GlufsTer2  | 0.140 | 57  | 8  |   |   | TPS |
| MCL5 | <i>MEF2C</i>   | c.68A>G               | p.Lys23Arg          | 0.487 | 150 | 73 | D | D | TPS |
| MCL5 | <i>ATM</i>     | c.6503C>T             | p.Ser2168Leu        | 0.523 | 86  | 45 | D | D | TPS |

|       |                |              |              |       |      |     |   |   |     |
|-------|----------------|--------------|--------------|-------|------|-----|---|---|-----|
| MCL5  | <i>BCL11B</i>  | c.578G>T     | p.Gly193Val  | 0.405 | 568  | 230 | T | B | TPS |
| MCL5  | <i>FLYWCHI</i> | c.1354C>T    | p.Arg452Trp  | 0.491 | 481  | 236 | D | D | TPS |
| MCL5  | <i>SYNE1</i>   | c.12013-3C>T |              | 0.200 | 30   | 6   |   |   | TPS |
| MCL5  | <i>CARD11</i>  | c.1941-7G>T  |              | 0.424 | 238  | 101 |   |   | TPS |
| MCL5  | <i>TRPM6</i>   | c.4673-7C>T  |              | 0.188 | 32   | 6   |   |   | TPS |
| MCL5  | <i>FBXO42</i>  | c.1202C>A    | p.Ala401Asp  | 0.568 | 81   | 46  | T | B | TPS |
| MCL5  | <i>DNAJC6</i>  | c.1367A>G    | p.Asn456Ser  | 0.584 | 89   | 52  | T | B | TPS |
| MCL5  | <i>MKI67</i>   | c.802A>T     | p.Thr268Ser  | 0.549 | 71   | 39  | T | B | TPS |
| MCL5  | <i>KCNC2</i>   | c.1829T>A    | p.Val610Glu  | 0.525 | 61   | 32  | T | B | TPS |
| MCL5  | <i>ABCA7</i>   | c.1001G>A    | p.Arg334Gln  | 0.569 | 123  | 70  | T | B | TPS |
| MCL5  | <i>WHSC1</i>   | c.3295G>A    | p.Glu1099Lys | 0.327 | 98   | 32  | D | D | TPS |
| MCL5  | <i>FAT1</i>    | c.3379A>G    | p.Ile1127Val | 0.468 | 47   | 22  | T | B | TPS |
| MCL5  | <i>ATP10B</i>  | c.1324A>G    | p.Lys442Glu  | 0.596 | 47   | 28  | D | D | TPS |
| MCL5  | <i>RIMS2</i>   | c.1625-9C>T  |              | 0.524 | 21   | 11  |   |   | TPS |
| MCL5  | <i>COL14A1</i> | c.2004+7T>A  |              | 0.382 | 55   | 21  |   |   | TPS |
| MCL5  | <i>RBMXL3</i>  | c.818G>A     | p.Arg273His  | 0.988 | 81   | 80  | T | D | TPS |
| MCL6* | <i>NOTCH2</i>  | c.7198C>T    | p.Arg2400Ter | 0.342 | 570  | 195 |   |   | TPS |
| MCL6* | <i>FOXP1</i>   | c.1A>G       | p.Met1?      | 0.519 | 751  | 390 | D | P | TPS |
| MCL6* | <i>WDR66</i>   | c.25C>T      | p.Arg9Ter    | 0.478 | 502  | 240 |   |   | TPS |
| MCL6* | <i>DHCR7</i>   | c.907G>A     | p.Gly303Arg  | 0.566 | 1152 | 652 | D | D | TPS |
| MCL6* | <i>BRIP1</i>   | c.1442G>A    | p.Gly481Asp  | 0.528 | 951  | 502 | T | D | TPS |
| MCL6* | <i>FOXP1</i>   | c.301A>G     | p.Met101Val  | 0.519 | 751  | 390 | D | P | TPS |
| MCL6* | <i>AKT1</i>    | c.1373T>C    | p.Met458Thr  | 0.491 | 699  | 343 | T | B | TPS |
| MCL6* | <i>MTOR</i>    | c.3823G>T    | p.Val1275Phe | 0.782 | 925  | 723 | D | D | TPS |

|       |                |                       |                    |       |      |     |   |   |     |
|-------|----------------|-----------------------|--------------------|-------|------|-----|---|---|-----|
| MCL6* | <i>ATM</i>     | c.3878A>G             | p.Asn1293Ser       | 0.761 | 940  | 715 | T | B | TPS |
| MCL6* | <i>ARID1A</i>  | c.2161+35A>G          |                    | 0.855 | 413  | 353 |   |   | TPS |
| MCL6* | <i>TET1</i>    | c.1588A>G             | p.Ile530Val        | 0.466 | 472  | 220 | T | B | TPS |
| MCL6* | <i>CDH11</i>   | c.932A>G              | p.Asp311Gly        | 0.500 | 662  | 331 | T | D | TPS |
| MCL6* | <i>ACTN4</i>   | c.1469A>G             | p.Asn490Ser        | 0.516 | 820  | 423 | T | B | TPS |
| MCL6* | <i>CARD6</i>   | c.157C>A              | p.Leu53Ile         | 0.420 | 1234 | 518 | T | B | TPS |
| MCL6* | <i>PCLO</i>    | c.3539T>C             | p.Leu1180Pro       | 0.547 | 611  | 334 | T | B | TPS |
| MCL6* | <i>PKHD1L1</i> | c.8877C>A             | p.Asp2959Glu       | 0.510 | 814  | 415 | D | B | TPS |
| MCL6* | <i>ARID1A</i>  | c.5311C>T             | p.Pro1771Ser       | 0.877 | 65   | 57  | T | B | WES |
| MCL6* | <i>ATM</i>     | c.3878A>G             | p.Asn1293Ser       | 0.640 | 75   | 48  | T | B | WES |
| MCL6* | <i>CARD6</i>   | c.157C>A              | p.Leu53Ile         | 0.388 | 103  | 40  | T | B | WES |
| MCL6* | <i>DHCR7</i>   | c.907G>A              | p.Gly303Arg        | 0.586 | 162  | 95  | D | D | WES |
| MCL6* | <i>EZH2</i>    | c.1069C>T             | p.Arg357Trp        | 0.108 | 37   | 4   | D | D | WES |
| MCL6* | <i>KMT2C</i>   | c.943_946delinsTGCT   | p.GlyThr315CysSer  | 0.128 | 335  | 43  |   |   | WES |
| MCL6* | <i>MTOR</i>    | c.3823G>T             | p.Val1275Phe       | 0.623 | 106  | 66  | D | D | WES |
| MCL6* | <i>NOTCH2</i>  | c.7198C>T             | p.Arg2400Ter       | 0.386 | 127  | 49  |   |   | WES |
| MCL6* | <i>PCDHB2</i>  | c.2279_2280delinsAA   | p.Gly760Glu        | 0.846 | 13   | 11  |   |   | WES |
| MCL6* | <i>PCLO</i>    | c.3539T>C             | p.Leu1180Pro       | 0.385 | 26   | 10  | T | B | WES |
| MCL6* | <i>PKHD1L1</i> | c.8877C>A             | p.Asp2959Glu       | 0.548 | 135  | 74  | D | B | WES |
| MCL6* | <i>ROBO2</i>   | c.73_75delinsATC      | p.Val25Ile         | 0.156 | 307  | 48  |   |   | WES |
| MCL6* | <i>SYNE1</i>   | c.12149_12150delinsGT | p.Lys4050Ser       | 0.455 | 44   | 20  |   |   | WES |
| MCL6* | <i>SYNE1</i>   | c.5439del             | p.His1813GlnfsTer8 | 0.118 | 34   | 4   |   |   | WES |
| MCL6* | <i>TET1</i>    | c.1588A>G             | p.Ile530Val        | 0.397 | 63   | 25  | T | B | WES |
| MCL6* | <i>TUBA1B</i>  | c.859T>A              | p.Ser287Thr        | 0.139 | 65   | 9   |   | B | WES |

|       |                 |                   |                    |       |      |      |   |   |     |
|-------|-----------------|-------------------|--------------------|-------|------|------|---|---|-----|
| MCL6* | <i>WEE1</i>     | c.721A>C          | p.Asn241His        | 0.466 | 58   | 27   | T | P | WES |
| MCL6* | <i>ZNF117</i>   | c.1091G>A         | p.Gly364Glu        | 0.103 | 145  | 15   | T | B | WES |
| MCL7* | <i>KMT2D</i>    | c.12592C>T        | p.Arg4198Ter       | 0.503 | 914  | 460  |   |   | TPS |
| MCL7* | <i>EZH2</i>     | c.1936T>A         | p.Tyr646Asn        | 0.418 | 239  | 100  | D | D | TPS |
| MCL7* | <i>CD79A</i>    | c.538delG         | p.Asp180MetfsTer12 | 0.234 | 64   | 15   |   |   | TPS |
| MCL7* | <i>EBF1</i>     | c.461T>A          | p.Leu154Ter        | 0.261 | 115  | 30   |   |   | TPS |
| MCL7* | <i>LRTM1</i>    | c.1013_1014delAG  | p.Glu338AlafsTer3  | 0.326 | 519  | 169  |   |   | TPS |
| MCL7* | <i>COL6A3</i>   | c.466G>T          | p.Asp156Tyr        | 0.434 | 553  | 240  | D | P | TPS |
| MCL7* | <i>STAT6</i>    | c.1256A>G         | p.Asp419Gly        | 0.618 | 633  | 391  | D | D | TPS |
| MCL7* | <i>IRF8</i>     | c.1271T>A         | p.Ile424Asn        | 0.369 | 1119 | 413  | D | B | TPS |
| MCL7* | <i>TNFRSF14</i> | c.286T>G          | p.Cys96Gly         | 0.727 | 512  | 372  | D | D | TPS |
| MCL7* | <i>SLC29A2</i>  | c.278T>A          | p.Val93Asp         | 0.406 | 478  | 194  | D | B | TPS |
| MCL7* | <i>BCL2</i>     | c.47T>A           | p.Met16Lys         | 0.299 | 663  | 198  | D | P | TPS |
| MCL7* | <i>FAT4</i>     | c.14407C>T        | p.Pro4803Ser       | 0.360 | 189  | 68   | T | B | TPS |
| MCL7* | <i>EBF1</i>     | c.454C>G          | p.Arg152Gly        | 0.250 | 112  | 28   | D | D | TPS |
| MCL7* | <i>TYK2</i>     | c.2102G>C         | p.Arg701Thr        | 0.525 | 1113 | 584  | D | D | TPS |
| MCL7* | <i>GON4L</i>    | c.2150C>T         | p.Pro717Leu        | 0.450 | 535  | 241  | D | B | TPS |
| MCL7* | <i>ABCA3</i>    | c.4421G>A         | p.Arg1474Gln       | 0.483 | 1786 | 862  | T | P | TPS |
| MCL7* | <i>SOCS1</i>    | c.359C>T          | p.Alal20Val        | 0.486 | 902  | 438  | T | B | TPS |
| MCL7* | <i>TRRAP</i>    | c.1445C>G         | p.Ala482Gly        | 0.473 | 448  | 212  | T | B | TPS |
| MCL7* | <i>TRAF2</i>    | c.500G>A          | p.Arg167Gln        | 0.504 | 2486 | 1253 | T | B | TPS |
| MCL7* | <i>PLXNB3</i>   | c.1018G>A         | p.Gly340Ser        | 1.000 | 2196 | 2195 | T | B | TPS |
| MCL7* | <i>COL6A3</i>   | c.466G>T          | p.Asp156Tyr        | 0.550 | 40   | 22   | D | P | WES |
| MCL7* | <i>DLC1</i>     | c.762_763delinsCG | p.GlnAsn254HisAsp  | 0.576 | 66   | 38   |   |   | WES |



|       |                 |                       |                     |       |      |     |   |   |     |
|-------|-----------------|-----------------------|---------------------|-------|------|-----|---|---|-----|
| MCL7* | <i>EBF1</i>     | c.454C>G              | p.Arg152Gly         | 0.491 | 57   | 28  | D | D | WES |
| MCL7* | <i>EBF1</i>     | c.461T>A              | p.Leu154Ter         | 0.483 | 60   | 29  |   |   | WES |
| MCL7* | <i>EZH2</i>     | c.1921T>A             | p.Tyr641Asn         | 0.392 | 51   | 20  | D | D | WES |
| MCL7* | <i>FAT4</i>     | c.14407C>T            | p.Pro4803Ser        | 0.567 | 30   | 17  | T | B | WES |
| MCL7* | <i>GON4L</i>    | c.2150C>T             | p.Pro717Leu         | 0.447 | 47   | 21  | D | B | WES |
| MCL7* | <i>KMT2D</i>    | c.12592C>T            | p.Arg4198Ter        | 0.483 | 147  | 71  |   |   | WES |
| MCL7* | <i>KMT2D</i>    | c.8073_8094dup        | p.Thr2699SerfsTer32 | 0.283 | 173  | 49  |   |   | WES |
| MCL7* | <i>KMT2D</i>    | c.13885A>C            | p.Thr4629Pro        | 0.281 | 32   | 9   | D | D | WES |
| MCL7* | <i>LRTM1</i>    | c.1013_1014del        | p.Glu338AlafsTer3   | 0.268 | 138  | 37  |   |   | WES |
| MCL7* | <i>PCDHB2</i>   | c.2279_2280delinsAA   | p.Gly760Glu         | 1.000 | 30   | 30  |   |   | WES |
| MCL7* | <i>ROBO2</i>    | c.73_75delinsATC      | p.Val25Ile          | 0.286 | 189  | 54  |   |   | WES |
| MCL7* | <i>SLC29A2</i>  | c.278T>A              | p.Val93Asp          | 0.442 | 52   | 23  | D | B | WES |
| MCL7* | <i>STAT6</i>    | c.1256A>G             | p.Asp419Gly         | 0.639 | 72   | 46  | D | D | WES |
| MCL7* | <i>STAT6</i>    | c.1936A>C             | p.Ile646Leu         | 0.268 | 82   | 22  | T | B | WES |
| MCL7* | <i>SYNE1</i>    | c.12149_12150delinsGT | p.Lys4050Ser        | 0.351 | 37   | 13  |   |   | WES |
| MCL7* | <i>TNFRSF14</i> | c.286T>G              | p.Cys96Gly          | 0.588 | 102  | 60  | D | D | WES |
| MCL7* | <i>TRAF2</i>    | c.500G>A              | p.Arg167Gln         | 0.473 | 277  | 131 | T | B | WES |
| MCL7* | <i>TRRAP</i>    | c.1445C>G             | p.Ala482Gly         | 0.485 | 171  | 83  | T | B | WES |
| MCL7* | <i>TRRAP</i>    | c.4874G>T             | p.Arg1625Leu        | 0.445 | 1314 | 585 | T | P | WES |
| MCL7* | <i>TRRAP</i>    | c.203G>A              | p.Arg68Gln          | 0.105 | 38   | 4   | T | D | WES |
| MCL8* | <i>TP53</i>     | c.832C>T              | p.Pro278Ser         | 0.288 | 431  | 124 | D | D | TPS |
| MCL8* | <i>KMT2D</i>    | c.12027_12028delTT    | p.Ser4010Ter        | 0.295 | 414  | 122 |   |   | TPS |
| MCL8* | <i>KMT2D</i>    | c.10570C>T            | p.Gln3524Ter        | 0.251 | 362  | 91  |   |   | TPS |
| MCL8* | <i>PCLO</i>     | c.6463G>T             | p.Glu2155Ter        | 0.252 | 298  | 75  |   |   | TPS |

|       |                |              |              |       |     |     |   |   |     |
|-------|----------------|--------------|--------------|-------|-----|-----|---|---|-----|
| MCL8* | <i>KMT2D</i>   | c.11566C>A   | p.Gln3856Lys | 0.410 | 366 | 150 | D | D | TPS |
| MCL8* | <i>FAS</i>     | c.749G>A     | p.Arg250Gln  | 0.276 | 199 | 55  | D | D | TPS |
| MCL8* | <i>SI</i>      | c.3424-12T>C |              | 0.413 | 167 | 69  |   |   | TPS |
| MCL8* | <i>NF1</i>     | c.5608C>T    | p.Arg1870Trp | 0.241 | 374 | 90  | D | D | TPS |
| MCL8* | <i>DNAJC6</i>  | c.1415A>C    | p.Gln472Pro  | 0.268 | 392 | 105 | T | B | TPS |
| MCL8* | <i>KMT2A</i>   | c.166T>G     | p.Ser56Ala   | 0.333 | 42  | 14  | D | B | TPS |
| MCL8* | <i>TBL1XR1</i> | c.529T>C     | p.Trp177Arg  | 0.229 | 454 | 104 | D | D | TPS |
| MCL8* | <i>TNFAIP3</i> | c.979G>C     | p.Ala327Pro  | 0.395 | 570 | 225 | D | D | TPS |
| MCL8* | <i>ABCA7</i>   | c.5609G>T    | p.Gly1870Val | 0.449 | 652 | 293 | D | D | TPS |
| MCL8* | <i>LRP1B</i>   | c.5734G>A    | p.Ala1912Thr | 0.421 | 235 | 99  | D | D | TPS |
| MCL8* | <i>BIRC3</i>   | c.403C>T     | p.Arg135Cys  | 0.490 | 302 | 148 | D | P | TPS |
| MCL8* | <i>ABCA7</i>   | c.2892C>G    | p.Asp964Glu  | 0.373 | 656 | 245 | D | D | TPS |
| MCL8* | <i>MUC16</i>   | c.7871C>T    | p.Thr2624Met | 0.469 | 292 | 137 | D | D | TPS |
| MCL8* | <i>CREG2</i>   | c.502A>G     | p.Thr168Ala  | 0.525 | 404 | 212 | D | D | TPS |
| MCL8* | <i>IGLL5</i>   | c.206+8G>A   |              | 0.339 | 310 | 105 |   |   | TPS |
| MCL8* | <i>FAT4</i>    | c.1244C>G    | p.Pro415Arg  | 0.481 | 570 | 274 | D | D | TPS |
| MCL8* | <i>MAP1B</i>   | c.4903G>A    | p.Val1635Ile | 0.196 | 322 | 63  | D | B | TPS |
| MCL8* | <i>RIMS2</i>   | c.376C>T     | p.Arg126Cys  | 0.235 | 277 | 65  | D | D | TPS |
| MCL8* | <i>BCL2</i>    | c.351C>A     | p.Ser117Arg  | 0.197 | 304 | 60  | T | B | WES |
| MCL8* | <i>DNAJC6</i>  | c.1625A>C    | p.Gln542Pro  | 0.286 | 56  | 16  | T | B | WES |
| MCL8* | <i>FAS</i>     | c.749G>A     | p.Arg250Gln  | 0.256 | 82  | 21  | D | D | WES |
| MCL8* | <i>HEPH</i>    | c.1229G>A    | p.Arg410Lys  | 0.108 | 37  | 4   | T | B | WES |
| MCL8* | <i>IGLL5</i>   | c.170G>A     | p.Gly57Glu   | 0.203 | 69  | 14  | D | B | WES |
| MCL8* | <i>KMT2D</i>   | c.10570C>T   | p.Gln3524Ter | 0.257 | 140 | 36  |   |   | WES |

|        |                |                    |                    |       |      |     |   |   |     |
|--------|----------------|--------------------|--------------------|-------|------|-----|---|---|-----|
| MCL8*  | <i>KMT2D</i>   | c.12027_12028del   | p.Ser4010Ter       | 0.235 | 136  | 32  |   |   | WES |
| MCL8*  | <i>MAP1B</i>   | c.4903G>A          | p.Val1635Ile       | 0.202 | 124  | 25  | D | B | WES |
| MCL8*  | <i>MUC16</i>   | c.36539C>G         | p.Thr12180Ser      | 0.171 | 111  | 19  | D | B | WES |
| MCL8*  | <i>NFI</i>     | c.5545C>T          | p.Arg1849Trp       | 0.200 | 20   | 4   | D | D | WES |
| MCL8*  | <i>OGDHL</i>   | c.1487G>A          | p.Arg496His        | 0.178 | 107  | 19  | D | D | WES |
| MCL8*  | <i>PCLO</i>    | c.6463G>T          | p.Glu2155Ter       | 0.338 | 68   | 23  |   |   | WES |
| MCL8*  | <i>RIMS2</i>   | c.376C>T           | p.Arg126Cys        | 0.219 | 105  | 23  | D | D | WES |
| MCL8*  | <i>TBL1XR1</i> | c.529T>C           | p.Trp177Arg        | 0.215 | 65   | 14  | D | D | WES |
| MCL8*  | <i>TNFAIP3</i> | c.979G>C           | p.Ala327Pro        | 0.440 | 157  | 69  | D | D | WES |
| MCL8*  | <i>TP53</i>    | c.832C>T           | p.Pro278Ser        | 0.207 | 58   | 12  | D | D | WES |
| MCL9   | <i>BRAF</i>    | c.1803A>T          | p.Lys601Asn        | 0.534 | 103  | 55  | D | P | TPS |
| MCL9   | <i>SLC30A6</i> | c.786-1G>T         |                    | 0.206 | 34   | 7   |   |   | TPS |
| MCL9   | <i>CMYA5</i>   | c.868delC          | p.Gln290LysfsTer3  | 0.108 | 37   | 4   |   |   | TPS |
| MCL9   | <i>MPEG1</i>   | c.445C>T           | p.Arg149Ter        | 0.597 | 62   | 37  |   |   | TPS |
| MCL9   | <i>CDH23</i>   | c.8401T>G          | p.Phe2801Val       | 0.559 | 1009 | 564 | T | B | TPS |
| MCL9   | <i>ARID1A</i>  | c.6733G>A          | p.Asp2245Asn       | 0.464 | 1779 | 825 | D | P | TPS |
| MCL9   | <i>PHLPP1</i>  | c.1111G>A          | p.Gly371Ser        | 0.524 | 1228 | 643 | D |   | TPS |
| MCL9   | <i>ANKRD17</i> | c.369_374delCGACGA | p.Asp123_Asp124del | 0.325 | 117  | 38  |   |   | TPS |
| MCL9   | <i>APC</i>     | c.204A>C           | p.Leu68Phe         | 0.560 | 50   | 28  | T | B | TPS |
| MCL9   | <i>DDX3X</i>   | c.1079A>G          | p.Gln360Arg        | 0.859 | 71   | 61  | D | D | TPS |
| MCL9   | <i>TNRC6B</i>  | c.871G>A           | p.Asp291Asn        | 0.513 | 80   | 41  | T | P | TPS |
| MCL9   | <i>RP1</i>     | c.2923A>G          | p.Ile975Val        | 0.515 | 68   | 35  | T | B | TPS |
| MCL10* | <i>RBI</i>     | c.2267A>G          | p.Tyr756Cys        | 0.237 | 523  | 124 | D | D | TPS |
| MCL10* | <i>TET1</i>    | c.733C>T           | p.Gln245Ter        | 0.144 | 584  | 84  |   |   | TPS |

|        |                 |                       |                   |       |      |     |   |   |     |
|--------|-----------------|-----------------------|-------------------|-------|------|-----|---|---|-----|
| MCL10* | <i>B2M</i>      | c.43_44delCT          | p.Leu15PhefsTer41 | 0.213 | 1113 | 237 |   |   | TPS |
| MCL10* | <i>BAZ2A</i>    | c.2188_2189delAT      | p.Ile730ProfsTer7 | 0.307 | 479  | 147 |   |   | TPS |
| MCL10* | <i>RYR1</i>     | c.9859C>T             | p.Arg3287Cys      | 0.575 | 426  | 245 | D | D | TPS |
| MCL10* | <i>CDH23</i>    | c.7418T>C             | p.Leu2473Pro      | 0.493 | 832  | 410 | D | D | TPS |
| MCL10* | <i>SYNE1</i>    | c.8578A>G             | p.Thr2860Ala      | 0.491 | 922  | 453 | D | B | TPS |
| MCL10* | <i>FOXO1</i>    | c.71C>T               | p.Thr24Ile        | 0.154 | 1002 | 154 | D | D | TPS |
| MCL10* | <i>GON4L</i>    | c.5918C>G             | p.Pro1973Arg      | 0.187 | 375  | 70  | T | B | TPS |
| MCL10* | <i>CARD11</i>   | c.1010G>A             | p.Arg337Gln       | 0.170 | 406  | 69  | T | D | TPS |
| MCL10* | <i>IKBKB</i>    | c.1136G>T             | p.Gly379Val       | 0.409 | 381  | 156 | T | P | TPS |
| MCL10* | <i>NIN</i>      | c.1260-8C>T           |                   | 0.471 | 329  | 155 |   |   | TPS |
| MCL10* | <i>CDH8</i>     | c.1247G>A             | p.Arg416His       | 0.462 | 695  | 321 | T | B | TPS |
| MCL10* | <i>CACNA2D3</i> | c.2318C>T             | p.Ala773Val       | 0.452 | 828  | 374 | D | D | TPS |
| MCL10* | <i>CRYBG3</i>   | c.899C>A              | p.Pro300Gln       | 0.510 | 1020 | 520 |   | B | TPS |
| MCL10* | <i>ANKRD17</i>  | c.3931A>G             | p.Ile1311Val      | 0.457 | 488  | 223 | T | B | TPS |
| MCL11* | <i>TP53</i>     | c.733G>A              | p.Gly245Ser       | 0.408 | 152  | 62  | D | D | TPS |
| MCL11* | <i>CCND1</i>    | c.32A>G               | p.Glu11Gly        | 0.536 | 97   | 52  | T | B | TPS |
| MCL11* | <i>CCND1</i>    | c.34A>G               | p.Thr12Ala        | 0.505 | 105  | 53  | T | B | TPS |
| MCL11* | <i>CCND1</i>    | c.127T>C              | p.Ser43Pro        | 0.633 | 316  | 200 | T | B | TPS |
| MCL11* | <i>BIRC3</i>    | c.653A>G              | p.Lys218Arg       | 0.600 | 85   | 51  | T | P | TPS |
| MCL11* | <i>CHSY3</i>    | c.1087-9_1087-7delACT |                   | 0.481 | 54   | 26  |   |   | TPS |
| MCL11* | <i>ATP10B</i>   | c.1793C>T             | p.Thr598Ile       | 0.597 | 62   | 37  | D | P | TPS |
| MCL11* | <i>RGS4</i>     | c.361G>A              | p.Gly121Ser       | 0.500 | 180  | 90  | T | D | TPS |
| MCL11* | <i>SOCS1</i>    | c.227C>G              | p.Ala76Gly        | 0.434 | 53   | 23  | T | P | TPS |
| MCL11* | <i>SOCS1</i>    | c.149C>T              | p.Pro50Leu        | 0.420 | 50   | 21  | T | B | TPS |

|        |               |                                             |                                                 |       |     |     |   |   |     |
|--------|---------------|---------------------------------------------|-------------------------------------------------|-------|-----|-----|---|---|-----|
| MCL11* | <i>CDH11</i>  | c.932A>G                                    | p.Asp311Gly                                     | 0.412 | 148 | 61  | T | D | TPS |
| MCL11* | <i>SUZ12</i>  | c.275-9A>G                                  |                                                 | 0.360 | 114 | 41  |   |   | TPS |
| MCL11* | <i>MAP1B</i>  | c.4069C>T                                   | p.Pro1357Ser                                    | 0.543 | 105 | 57  | T | B | TPS |
| MCL11* | <i>PCLO</i>   | c.1124_1125delinsCTCTTGGTCCTGCTACCTCCCTCCAC | p.Gln375delinsProLeuGlyProAlaLysProProAlaGlnHis | 0.188 | 154 | 29  |   |   | WES |
| MCL11* | <i>ATP10B</i> | c.1793C>T                                   | p.Thr598Ile                                     | 0.381 | 42  | 16  | D | P | WES |
| MCL11* | <i>BIRC3</i>  | c.653A>G                                    | p.Lys218Arg                                     | 0.638 | 47  | 30  | T | P | WES |
| MCL11* | <i>CCND1</i>  | c.32_34delinsGAG                            | p.GluThr11GlyAla                                | 0.558 | 197 | 110 |   |   | WES |
| MCL11* | <i>CCND1</i>  | c.127T>C                                    | p.Ser43Pro                                      | 0.628 | 430 | 270 | T | B | WES |
| MCL11* | <i>DLC1</i>   | c.762_763delinsCG                           | p.GlnAsn254HisAsp                               | 0.983 | 60  | 59  |   |   | WES |
| MCL11* | <i>IKBKB</i>  | c.1600C>T                                   | p.Arg534Trp                                     | 0.452 | 248 | 112 | D | D | WES |
| MCL11* | <i>MAP1B</i>  | c.5512T>C                                   | p.Phe1838Leu                                    | 0.419 | 74  | 31  | D | B | WES |
| MCL11* | <i>MAP1B</i>  | c.4069C>T                                   | p.Pro1357Ser                                    | 0.396 | 48  | 19  | T | B | WES |
| MCL11* | <i>MPDZ</i>   | c.1285A>G                                   | p.Ile429Val                                     | 0.603 | 136 | 82  | T | B | WES |
| MCL11* | <i>RGS4</i>   | c.361G>A                                    | p.Gly121Ser                                     | 0.463 | 54  | 25  | T | D | WES |
| MCL11* | <i>ROBO2</i>  | c.73_75delinsATC                            | p.Val25Ile                                      | 0.291 | 203 | 59  |   |   | WES |
| MCL12* | <i>ATM</i>    | c.4320_4323delAATA                          | p.Lys1440AsnfsTer10                             | 0.152 | 92  | 14  |   |   | TPS |
| MCL12* | <i>PLCG2</i>  | c.2534T>A                                   | p.Leu845Ter                                     | 0.523 | 111 | 58  |   |   | TPS |
| MCL12* | <i>FAT1</i>   | c.4358G>A                                   | p.Arg1453His                                    | 0.534 | 148 | 79  | D | D | TPS |
| MCL12* | <i>CIITA</i>  | c.3063-12G>T                                |                                                 | 0.476 | 82  | 39  |   |   | TPS |
| MCL12* | <i>ATR</i>    | c.325C>T                                    | p.Arg109Trp                                     | 0.335 | 272 | 91  | D | D | TPS |
| MCL12* | <i>UBR5</i>   | c.8304C>G                                   | p.Cys2768Trp                                    | 0.290 | 210 | 61  | D | D | TPS |
| MCL12* | <i>SLC3A2</i> | c.157G>A                                    | p.Ala53Thr                                      | 0.490 | 147 | 72  | T | P | TPS |
| MCL12* | <i>BIRC3</i>  | c.1325-3A>G                                 |                                                 | 0.277 | 112 | 31  |   |   | TPS |

|        |                |                       |                     |       |     |     |   |   |     |
|--------|----------------|-----------------------|---------------------|-------|-----|-----|---|---|-----|
| MCL12* | <i>ARID5B</i>  | c.3128A>G             | p.Lys1043Arg        | 0.451 | 142 | 64  | D | D | TPS |
| MCL12* | <i>YLPM1</i>   | c.5074C>T             | p.Arg1692Cys        | 0.492 | 244 | 120 | D | D | TPS |
| MCL12* | <i>ABCA6</i>   | c.1678G>T             | p.Val560Phe         | 0.441 | 247 | 109 | T | B | TPS |
| MCL12* | <i>LRP1B</i>   | c.2281A>G             | p.Ile761Val         | 0.509 | 163 | 83  | T | B | TPS |
| MCL12* | <i>ANK2</i>    | c.10067G>A            | p.Arg3356Lys        | 0.114 | 35  | 4   | T | B | WES |
| MCL12* | <i>ANK2</i>    | c.10030_10031delinsAA | p.Pro3344Lys        | 0.102 | 49  | 5   |   |   | WES |
| MCL12* | <i>ANK2</i>    | c.4454C>T             | p.Ser1485Phe        | 0.114 | 35  | 4   | D | D | WES |
| MCL12* | <i>ANKRD17</i> | c.2218G>A             | p.Asp740Asn         | 0.122 | 41  | 5   | D | D | WES |
| MCL12* | <i>ARID1A</i>  | c.2249G>A             | p.Arg750Gln         | 0.167 | 24  | 4   | D | D | WES |
| MCL12* | <i>ARID5B</i>  | c.2399A>G             | p.Lys800Arg         | 0.291 | 55  | 16  | D | D | WES |
| MCL12* | <i>ATM</i>     | c.667G>A              | p.Glu223Lys         | 0.143 | 28  | 4   | D | D | WES |
| MCL12* | <i>ATM</i>     | c.1537C>T             | p.Gln513Ter         | 0.105 | 38  | 4   |   |   | WES |
| MCL12* | <i>ATM</i>     | c.2369G>A             | p.Cys790Tyr         | 0.143 | 28  | 4   | T | B | WES |
| MCL12* | <i>ATM</i>     | c.7183G>A             | p.Asp2395Asn        | 0.128 | 47  | 6   | D | D | WES |
| MCL12* | <i>ATM</i>     | c.3467C>T             | p.Thr1156Met        | 0.129 | 31  | 4   | T | B | WES |
| MCL12* | <i>BCL10</i>   | c.46G>A               | p.Val16Met          | 0.222 | 18  | 4   | D | D | WES |
| MCL12* | <i>BCL6</i>    | c.285_327del          | p.Asn96CysfsTer40   | 0.200 | 20  | 4   |   |   | WES |
| MCL12* | <i>BIRC3</i>   | c.1409C>T             | p.Thr470Ile         | 0.118 | 34  | 4   | T | B | WES |
| MCL12* | <i>BRCA2</i>   | c.1208T>A             | p.Leu403Gln         | 0.211 | 19  | 4   | D | D | WES |
| MCL12* | <i>BRCA2</i>   | c.6085G>A             | p.Glu2029Lys        | 0.148 | 27  | 4   | T | B | WES |
| MCL12* | <i>CCDC15</i>  | c.919C>T              | p.Pro307Ser         | 0.125 | 32  | 4   | D | P | WES |
| MCL12* | <i>CCND3</i>   | c.469-60_478dup       | p.Arg160HisfsTer106 | 0.146 | 41  | 6   |   |   | WES |
| MCL12* | <i>CDK4</i>    | c.581C>T              | p.Pro194Leu         | 0.106 | 47  | 5   | D | B | WES |
| MCL12* | <i>CHSY3</i>   | c.1393G>A             | p.Glu465Lys         | 0.111 | 36  | 4   | T | P | WES |

|        |               |                                          |                      |       |     |    |   |   |     |
|--------|---------------|------------------------------------------|----------------------|-------|-----|----|---|---|-----|
| MCL12* | <i>CRYBG3</i> | c.5879G>A                                | p.Arg1960Lys         | 0.200 | 20  | 4  |   | B | WES |
| MCL12* | <i>DGKB</i>   | c.91G>A                                  | p.Asp31Asn           | 0.160 | 25  | 4  | D | B | WES |
| MCL12* | <i>DLC1</i>   | c.762_763delinsCG                        | p.GlnAsn254HisAsp    | 0.609 | 46  | 28 |   |   | WES |
| MCL12* | <i>DNAJC6</i> | c.2765_2766del                           | p.Val922GlufsTer15   | 0.150 | 40  | 6  |   |   | WES |
| MCL12* | <i>EZH2</i>   | c.1995del                                | p.Leu666CysfsTer4    | 0.108 | 37  | 4  |   |   | WES |
| MCL12* | <i>FAT1</i>   | c.4358G>A                                | p.Arg1453His         | 0.483 | 29  | 14 | D | D | WES |
| MCL12* | <i>FAT1</i>   | c.7922G>A                                | p.Ser2641Asn         | 0.267 | 15  | 4  | T | B | WES |
| MCL12* | <i>FAT4</i>   | c.1958C>T                                | p.Ala653Val          | 0.118 | 34  | 4  | T | P | WES |
| MCL12* | <i>FAT4</i>   | c.10654_10704del                         | p.Gly3552_Thr3568del | 0.122 | 41  | 5  |   |   | WES |
| MCL12* | <i>FAT4</i>   | c.673_786dup                             | p.Lys225_Asp262dup   | 0.105 | 38  | 4  |   |   | WES |
| MCL12* | <i>FBXO25</i> | c.91A>C                                  | p.Lys31Gln           | 0.275 | 51  | 14 | T | B | WES |
| MCL12* | <i>KMT2C</i>  | c.13627_13628del                         | p.Glu4543ThrfsTer9   | 0.109 | 55  | 6  |   |   | WES |
| MCL12* | <i>KMT2D</i>  | c.10102G>A                               | p.Val3368Ile         | 0.138 | 29  | 4  | T | B | WES |
| MCL12* | <i>KMT2D</i>  | c.12039_12117delinsGTCCATGACCCAGAACCTTCT | p.Ala4014SerfsTer17  | 0.154 | 26  | 4  |   |   | WES |
| MCL12* | <i>KMT2D</i>  | c.16387G>A                               | p.Ala5463Thr         | 0.133 | 30  | 4  | D | D | WES |
| MCL12* | <i>KMT2D</i>  | c.1087G>A                                | p.Glu363Lys          | 0.111 | 36  | 4  | T | B | WES |
| MCL12* | <i>KMT2D</i>  | c.12296G>A                               | p.Gly4099Glu         | 0.250 | 16  | 4  | D | D | WES |
| MCL12* | <i>KMT2D</i>  | c.10154T>C                               | p.Met3385Thr         | 0.133 | 30  | 4  | D | B | WES |
| MCL12* | <i>KMT2D</i>  | c.5792_5829del                           | p.Pro1931LeufsTer13  | 0.111 | 36  | 4  |   |   | WES |
| MCL12* | <i>KMT2D</i>  | c.7142C>T                                | p.Pro2381Leu         | 0.182 | 22  | 4  | T | D | WES |
| MCL12* | <i>KMT2D</i>  | c.9677C>T                                | p.Pro3226Leu         | 0.103 | 39  | 4  | T | B | WES |
| MCL12* | <i>LRP1B</i>  | c.12391G>A                               | p.Ala4131Thr         | 0.108 | 37  | 4  | T | B | WES |
| MCL12* | <i>LRP1B</i>  | c.2281A>G                                | p.Ile761Val          | 0.273 | 66  | 18 | T | B | WES |
| MCL12* | <i>MKI67</i>  | c.4547_4550delinsAGCT                    | p.ArgPro1516GlnLeu   | 0.426 | 101 | 43 |   |   | WES |

|        |               |                  |                    |       |     |    |   |   |     |
|--------|---------------|------------------|--------------------|-------|-----|----|---|---|-----|
| MCL12* | <i>MKI67</i>  | c.2260C>T        | p.Pro754Ser        | 0.121 | 33  | 4  | T | B | WES |
| MCL12* | <i>MTOR</i>   | c.3679G>A        | p.Glu1227Lys       | 0.129 | 31  | 4  | T | P | WES |
| MCL12* | <i>NCOR2</i>  | c.2762C>T        | p.Ser921Phe        | 0.133 | 30  | 4  | D | D | WES |
| MCL12* | <i>NCOR2</i>  | c.6628G>A        | p.Glu2210Lys       | 0.105 | 38  | 4  | D | D | WES |
| MCL12* | <i>NCOR2</i>  | c.194G>A         | p.Arg65Lys         | 0.133 | 60  | 8  | D | P | WES |
| MCL12* | <i>NOTCH2</i> | c.2491C>T        | p.Gln831Ter        | 0.118 | 34  | 4  |   |   | WES |
| MCL12* | <i>OGDHL</i>  | c.1220C>T        | p.Ala407Val        | 0.102 | 59  | 6  | D | P | WES |
| MCL12* | <i>PCLO</i>   | c.5116G>A        | p.Asp1706Asn       | 0.105 | 38  | 4  | T | D | WES |
| MCL12* | <i>PCLO</i>   | c.910_989del     | p.Pro304AlafsTer40 | 0.119 | 42  | 5  |   |   | WES |
| MCL12* | <i>PDLIM3</i> | c.29C>T          | p.Pro10Leu         | 0.344 | 32  | 11 | D | D | WES |
| MCL12* | <i>RBI</i>    | c.536G>A         | p.Ser179Asn        | 0.108 | 37  | 4  | T | B | WES |
| MCL12* | <i>RELN</i>   | c.4231C>T        | p.Pro1411Ser       | 0.148 | 27  | 4  | T | D | WES |
| MCL12* | <i>RIMS2</i>  | c.196G>A         | p.Glu66Lys         | 0.143 | 28  | 4  | D | P | WES |
| MCL12* | <i>RIMS2</i>  | c.1422G>A        | p.Met474Ile        | 0.121 | 58  | 7  | D | P | WES |
| MCL12* | <i>ROBO2</i>  | c.73_75delinsATC | p.Val25Ile         | 0.146 | 130 | 19 |   |   | WES |
| MCL12* | <i>SETD2</i>  | c.1276C>T        | p.His426Tyr        | 0.138 | 29  | 4  | D | P | WES |
| MCL12* | <i>SETD2</i>  | c.3790C>T        | p.Gln1264Ter       | 0.121 | 33  | 4  |   |   | WES |
| MCL12* | <i>SF3B1</i>  | c.2431C>T        | p.Leu811Phe        | 0.109 | 55  | 6  | D | D | WES |
| MCL12* | <i>SGK1</i>   | c.136_138delinsT | p.Thr46TrpfsTer25  | 0.121 | 33  | 4  |   |   | WES |
| MCL12* | <i>SI</i>     | c.691_692inv     | p.Thr231Val        | 0.105 | 38  | 4  |   |   | WES |
| MCL12* | <i>SPEN</i>   | c.374G>A         | p.Arg125Gln        | 0.147 | 34  | 5  | D | D | WES |
| MCL12* | <i>SYNE1</i>  | c.13147G>A       | p.Glu4383Lys       | 0.129 | 31  | 4  | T | D | WES |
| MCL12* | <i>SYNE1</i>  | c.18751G>A       | p.Glu6251Lys       | 0.154 | 39  | 6  | T | B | WES |
| MCL12* | <i>SYNE1</i>  | c.772G>A         | p.Gly258Arg        | 0.143 | 28  | 4  | D | P | WES |



|        |                |                      |                          |       |     |     |   |   |     |
|--------|----------------|----------------------|--------------------------|-------|-----|-----|---|---|-----|
| MCL12* | <i>SYNE1</i>   | c.16199_16228del     | p.Gly5400_Asp5409del     | 0.109 | 55  | 6   |   |   | WES |
| MCL12* | <i>TUBA1B</i>  | c.859T>A             | p.Ser287Thr              | 0.182 | 22  | 4   |   | B | WES |
| MCL12* | <i>UBR5</i>    | c.8304C>G            | p.Cys2768Trp             | 0.228 | 92  | 21  | D | D | WES |
| MCL12* | <i>UBR5</i>    | c.1051C>A            | p.Gln351Lys              | 0.114 | 35  | 4   | T | B | WES |
| MCL12* | <i>UBR5</i>    | c.2327G>A            | p.Gly776Glu              | 0.235 | 17  | 4   | D | D | WES |
| MCL13† | <i>SP140</i>   | c.646delC            | p.Leu216TyrfsTer15       | 0.421 | 468 | 197 |   |   | TPS |
| MCL13† | <i>TP53</i>    | c.329G>C             | p.Arg110Pro              | 0.801 | 146 | 117 | D | D | TPS |
| MCL13† | <i>TP53</i>    | XR_243565.1:n.468G>C |                          | 0.801 | 146 | 117 | D | D | TPS |
| MCL13† | <i>NOTCH2</i>  | c.5621A>G            | p.Asp1874Gly             | 0.440 | 175 | 77  | D | D | TPS |
| MCL13† | <i>DYNC1H1</i> | c.6529G>A            | p.Ala2177Thr             | 0.923 | 207 | 191 | T | B | TPS |
| MCL13† | <i>FLYWCHI</i> | c.1775A>T            | p.Asp592Val              | 0.390 | 77  | 30  | D | B | TPS |
| MCL13† | <i>NSD1</i>    | c.487G>T             | p.Asp163Tyr              | 0.520 | 743 | 386 | D | P | TPS |
| MCL13† | <i>KMT2A</i>   | c.218G>A             | p.Gly73Glu               | 0.455 | 143 | 65  | D | B | TPS |
| MCL13† | <i>SIPR2</i>   | c.17C>T              | p.Ser6Leu                | 0.428 | 159 | 68  |   | P | TPS |
| MCL13† | <i>ANKRD44</i> | c.1766C>T            | p.Ser589Leu              | 0.551 | 363 | 200 | T | P | TPS |
| MCL13† | <i>CASP10</i>  | c.814-10A>G          |                          | 0.475 | 217 | 103 |   |   | TPS |
| MCL13† | <i>CRYBG3</i>  | c.7542C>G            | p.His2514Gln             | 0.533 | 548 | 292 |   | B | TPS |
| MCL13† | <i>PLXNA1</i>  | c.5627C>T            | p.Ala1876Val             | 0.436 | 335 | 146 | D | P | TPS |
| MCL13† | <i>DGKB</i>    | c.1744A>C            | p.Ile582Leu              | 0.311 | 837 | 260 | D | D | TPS |
| MCL13† | <i>PCLO</i>    | c.8509A>G            | p.Arg2837Gly             | 0.445 | 292 | 130 | D | P | TPS |
| MCL13† | <i>PCLO</i>    | c.5891C>T            | p.Thr1964Met             | 0.432 | 463 | 200 | D | P | TPS |
| MCL14† | <i>PCLO</i>    | c.1123_1124insCT     | p.Gln375ProfsTer18       | 0.121 | 33  | 4   |   |   | TPS |
| MCL14† | <i>PCLO</i>    | c.1124_1126delAGA    | p.Gln375_Thr376delinsPro | 0.111 | 36  | 4   |   |   | TPS |
| MCL14† | <i>NF1</i>     | c.3859T>C            | p.Phe1287Leu             | 0.218 | 500 | 109 | D | D | TPS |

|        |                |                 |              |       |      |     |   |   |     |
|--------|----------------|-----------------|--------------|-------|------|-----|---|---|-----|
| MCL14† | <i>CCND1</i>   | c.39C>G         | p.Ile13Met   | 0.818 | 538  | 440 | T | B | TPS |
| MCL14† | <i>FAT1</i>    | c.2114A>C       | p.Asp705Ala  | 0.447 | 226  | 101 | D | D | TPS |
| MCL14† | <i>MEF2C</i>   | c.349T>C        | p.Tyr117His  | 0.330 | 349  | 115 | D | D | TPS |
| MCL14† | <i>ABCA7</i>   | c.2540A>G       | p.Lys847Arg  | 0.440 | 116  | 51  | D | D | TPS |
| MCL14† | <i>RGS4</i>    | c.706C>T        | p.Arg236Trp  | 0.461 | 206  | 95  | D | P | TPS |
| MCL14† | <i>NAV3</i>    | c.4586G>A       | p.Arg1529His | 0.469 | 209  | 98  | D | D | TPS |
| MCL14† | <i>TRAF3</i>   | c.139G>A        | p.Val47Met   | 0.329 | 456  | 150 | T | D | TPS |
| MCL14† | <i>MAP2</i>    | c.4585-1138A>G  |              | 0.614 | 197  | 121 |   |   | TPS |
| MCL14† | <i>ANK2</i>    | c.9682G>A       | p.Val3228Met | 0.531 | 143  | 76  | T | B | TPS |
| MCL14† | <i>CD83</i>    | c.220C>T        | p.Arg74Cys   | 0.518 | 363  | 188 | D | B | TPS |
| MCL14† | <i>CARD11</i>  | c.2801C>T       | p.Ser934Leu  | 0.554 | 83   | 46  | D | B | TPS |
| MCL15† | <i>CARD11</i>  | c.692_694dupAGC | p.Gln231dup  | 0.183 | 82   | 15  |   |   | TPS |
| MCL15† | <i>LRP1B</i>   | c.268T>A        | p.Cys90Ser   | 0.286 | 154  | 44  | D | D | TPS |
| MCL15† | <i>ABCA6</i>   | c.940T>G        | p.Leu314Val  | 0.550 | 80   | 44  | T | B | TPS |
| MCL15† | <i>TCF3</i>    | c.1162G>A       | p.Gly388Ser  | 0.418 | 677  | 283 | T | B | TPS |
| MCL15† | <i>CRYBG3</i>  | c.4303C>T       | p.Arg1435Trp | 0.615 | 104  | 64  |   |   | TPS |
| MCL15† | <i>ANKRD17</i> | c.4918G>T       | p.Ala1640Ser | 0.386 | 176  | 68  | D | B | TPS |
| MCL15† | <i>SI</i>      | c.749G>A        | p.Arg250His  | 0.552 | 143  | 79  | D | D | TPS |
| MCL15† | <i>SPEN</i>    | c.8386C>G       | p.Arg2796Gly | 0.462 | 1079 | 499 | D | P | TPS |
| MCL15† | <i>COL16A1</i> | c.739-3C>T      |              | 0.580 | 69   | 40  |   |   | TPS |
| MCL15† | <i>DTX1</i>    | c.1792G>A       | p.Ala598Thr  | 0.292 | 665  | 194 | D | B | TPS |
| MCL15† | <i>ABCA3</i>   | c.3613G>A       | p.Gly1205Arg | 0.322 | 146  | 47  | T | B | TPS |
| MCL15† | <i>ABCA7</i>   | c.1001G>A       | p.Arg334Gln  | 0.417 | 307  | 128 | T | B | TPS |
| MCL15† | <i>SETD2</i>   | c.5306C>A       | p.Ser1769Tyr | 0.610 | 195  | 119 | T | P | TPS |

|        |                |              |                   |       |      |     |   |   |     |
|--------|----------------|--------------|-------------------|-------|------|-----|---|---|-----|
| MCL15† | <i>EPHA3</i>   | c.407G>A     | p.Arg136Gln       | 0.394 | 132  | 52  | T | B | TPS |
| MCL15† | <i>PLXNA1</i>  | c.5627C>T    | p.Ala1876Val      | 0.351 | 1315 | 461 | D | P | TPS |
| MCL15† | <i>ABCA13</i>  | c.9200A>G    | p.Asp3067Gly      | 0.477 | 44   | 21  | D | B | TPS |
| MCL15† | <i>PLXNB3</i>  | c.3037G>A    | p.Ala1013Thr      | 1.000 | 281  | 281 | T | B | TPS |
| MCL16† | <i>ABCC9</i>   | c.3589C>T    | p.Arg1197Cys      | 0.513 | 78   | 40  | D | D | TPS |
| MCL16† | <i>KMT2D</i>   | c.7036G>A    | p.Gly2346Ser      | 0.571 | 35   | 20  | T | P | TPS |
| MCL16† | <i>MEF2C</i>   | c.259-99C>T  |                   | 0.538 | 93   | 50  |   |   | TPS |
| MCL16† | <i>CDH23</i>   | c.9047G>A    | p.Arg3016His      | 0.538 | 52   | 28  | T | P | TPS |
| MCL16† | <i>ABCA7</i>   | c.67-3delC   |                   | 0.485 | 33   | 16  |   |   | TPS |
| MCL16† | <i>MUC16</i>   | c.2609C>T    | p.Ser870Leu       | 0.458 | 59   | 27  | T | B | TPS |
| MCL16† | <i>ABCA13</i>  | c.12070+5G>A |                   | 0.167 | 24   | 4   |   |   | TPS |
| MCL16† | <i>ATP11C</i>  | c.3329C>T    | p.Ser1110Phe      | 0.250 | 24   | 6   | D | B | TPS |
| MCL16† | <i>ATRX</i>    | c.3086C>T    | p.Pro1029Leu      | 1.000 | 29   | 29  | D | B | TPS |
| MCL16† | <i>FAT1</i>    | c.11251A>G   | p.Lys3751Glu      | 0.470 | 66   | 31  | T | B | TPS |
| MCL16† | <i>ATP10B</i>  | c.3971G>A    | p.Gly1324Glu      | 0.476 | 63   | 30  | T | P | TPS |
| MCL16† | <i>PCLO</i>    | c.9015T>G    | p.Phe3005Leu      | 0.277 | 65   | 18  | T | B | TPS |
| MCL16† | <i>PKHD1L1</i> | c.6536C>T    | p.Ala2179Val      | 0.478 | 69   | 33  | T | B | TPS |
| MCL16† | <i>JAK2</i>    | c.227-7T>C   |                   | 0.512 | 41   | 21  |   |   | TPS |
| MCL17† | <i>TP53</i>    | c.994-2A>G   |                   | 0.484 | 62   | 30  |   |   | TPS |
| MCL17† | <i>ASXL1</i>   | c.2694G>A    | p.Trp898Ter       | 0.188 | 96   | 18  |   |   | TPS |
| MCL17† | <i>BRCC3</i>   | c.241delC    | p.Arg81AspfsTer10 | 0.215 | 65   | 14  |   |   | TPS |
| MCL17† | <i>PKHD1L1</i> | c.11354C>A   | p.Pro3785Gln      | 0.317 | 123  | 39  | D | D | TPS |
| MCL17† | <i>SLC3A2</i>  | c.113-806A>G |                   | 0.191 | 47   | 9   | T | B | TPS |
| MCL17† | <i>MAP1B</i>   | c.6110C>T    | p.Thr2037Ile      | 0.469 | 177  | 83  | D | B | TPS |

|        |                |                   |                     |       |     |    |   |   |     |
|--------|----------------|-------------------|---------------------|-------|-----|----|---|---|-----|
| MCL17† | <i>ANK2</i>    | c.11320G>A        | p.Val3774Met        | 0.488 | 43  | 21 | D | D | TPS |
| MCL17† | <i>PKHD1L1</i> | c.1933G>A         | p.Ala645Thr         | 0.461 | 180 | 83 | T | B | TPS |
| MCL18  | <i>ATM</i>     | c.5251G>T         | p.Glu1751Ter        | 0.351 | 74  | 26 |   |   | TPS |
| MCL18  | <i>ZRSR2</i>   | c.356_359delGAGA  | p.Arg119LysfsTer45  | 0.585 | 41  | 24 |   |   | TPS |
| MCL18  | <i>TBL1XR1</i> | c.497G>A          | p.Arg166Gln         | 0.206 | 107 | 22 | T | B | TPS |
| MCL18  | <i>NOTCH2</i>  | c.6982T>C         | p.Cys2328Arg        | 0.500 | 174 | 87 | T | B | TPS |
| MCL18  | <i>KCNC2</i>   | c.1579G>A         | p.Gly527Ser         | 0.473 | 55  | 26 | T | B | TPS |
| MCL18  | <i>FAT1</i>    | c.11818A>G        | p.Thr3940Ala        | 0.435 | 23  | 10 | T | B | TPS |
| MCL18  | <i>CARD11</i>  | c.3260+3A>G       |                     | 0.598 | 107 | 64 |   |   | TPS |
| MCL18  | <i>ACTB</i>    | c.883G>A          | p.Ala295Thr         | 0.108 | 83  | 9  |   | B | WES |
| MCL18  | <i>ANK2</i>    | c.8240G>A         | p.Arg2747His        | 0.385 | 52  | 20 | D | B | WES |
| MCL18  | <i>ANK2</i>    | c.6023C>T         | p.Thr2008Ile        | 0.160 | 25  | 4  | D | B | WES |
| MCL18  | <i>APC</i>     | c.4485_4555dup    | p.Asp1519ValfsTer12 | 0.182 | 22  | 4  |   |   | WES |
| MCL18  | <i>ATM</i>     | c.5251G>T         | p.Glu1751Ter        | 0.287 | 115 | 33 |   |   | WES |
| MCL18  | <i>ATM</i>     | c.7528A>T         | p.Lys2510Ter        | 0.477 | 44  | 21 |   |   | WES |
| MCL18  | <i>ATRX</i>    | c.6301G>A         | p.Glu2101Lys        | 0.118 | 34  | 4  | T | D | WES |
| MCL18  | <i>BRCA2</i>   | c.2668_2700del    | p.Phe890_Asn900del  | 0.125 | 32  | 4  |   |   | WES |
| MCL18  | <i>CASP8</i>   | c.1289G>A         | p.Arg430Gln         | 0.133 | 30  | 4  | D | D | WES |
| MCL18  | <i>CCDC15</i>  | c.2296G>A         | p.Asp766Asn         | 0.103 | 39  | 4  | T | B | WES |
| MCL18  | <i>CEBPB</i>   | c.51_56del        | p.Pro18_Pro19del    | 0.111 | 36  | 4  |   |   | WES |
| MCL18  | <i>CHEK1</i>   | c.448_512del      | p.Gly150ThrfsTer19  | 0.143 | 42  | 6  |   |   | WES |
| MCL18  | <i>COL16A1</i> | c.1939C>T         | p.Arg647Cys         | 0.118 | 34  | 4  | T | D | WES |
| MCL18  | <i>CREBBP</i>  | c.3644G>A         | p.Gly1215Glu        | 0.103 | 39  | 4  | D | D | WES |
| MCL18  | <i>DLC1</i>    | c.762_763delinsCG | p.GlnAsn254HisAsp   | 0.872 | 47  | 41 |   |   | WES |

|       |                |                       |                      |       |     |    |   |   |     |
|-------|----------------|-----------------------|----------------------|-------|-----|----|---|---|-----|
| MCL18 | <i>FAT1</i>    | c.11818A>G            | p.Thr3940Ala         | 0.339 | 62  | 21 | T | B | WES |
| MCL18 | <i>GON4L</i>   | c.4504C>T             | p.Arg1502Cys         | 0.122 | 49  | 6  | D | B | WES |
| MCL18 | <i>HEPH</i>    | c.716_790del          | p.Asn239_Glu263del   | 0.138 | 29  | 4  |   |   | WES |
| MCL18 | <i>IGLL5</i>   | c.563A>G              | p.Lys188Arg          | 0.111 | 36  | 4  | T | B | WES |
| MCL18 | <i>KCNC2</i>   | c.1579G>A             | p.Gly527Ser          | 0.481 | 77  | 37 | T | B | WES |
| MCL18 | <i>KMT2C</i>   | c.6499C>T             | p.Arg2167Trp         | 0.103 | 39  | 4  | D | D | WES |
| MCL18 | <i>KMT2D</i>   | c.13885A>C            | p.Thr4629Pro         | 0.316 | 19  | 6  | D | D | WES |
| MCL18 | <i>MAP3K14</i> | c.2281G>A             | p.Gly761Arg          | 0.563 | 16  | 9  |   | D | WES |
| MCL18 | <i>MKI67</i>   | c.5627_5630delinsAGCT | p.ArgPro1876GlnLeu   | 0.952 | 63  | 60 |   |   | WES |
| MCL18 | <i>MPDZ</i>    | c.4919G>A             | p.Gly1640Asp         | 0.121 | 33  | 4  | D | D | WES |
| MCL18 | <i>NIN</i>     | c.3748_3749ins        | p.Lys1249_Leu1250ins | 0.139 | 36  | 5  |   |   | WES |
| MCL18 | <i>NOTCH2</i>  | c.6982T>C             | p.Cys2328Arg         | 0.482 | 27  | 13 | T | B | WES |
| MCL18 | <i>NOTCH2</i>  | c.2042T>A             | p.Ile681Asn          | 0.490 | 51  | 25 | T | B | WES |
| MCL18 | <i>NOTCH3</i>  | c.4348G>A             | p.Ala1450Thr         | 0.386 | 83  | 32 | T | D | WES |
| MCL18 | <i>PCLO</i>    | c.8582C>T             | p.Ala2861Val         | 0.143 | 28  | 4  | T | B | WES |
| MCL18 | <i>PCLO</i>    | c.1123_1124ins        | p.Gln374_Gln375ins   | 0.281 | 32  | 9  |   |   | WES |
| MCL18 | <i>PLXNB3</i>  | c.4259C>T             | p.Thr1420Met         | 0.125 | 32  | 4  | D | D | WES |
| MCL18 | <i>RELN</i>    | c.6142G>A             | p.Gly2048Arg         | 0.114 | 35  | 4  | T | D | WES |
| MCL18 | <i>RIMS2</i>   | c.162_163ins          | p.Gln55LysfsTer64    | 0.143 | 28  | 4  |   |   | WES |
| MCL18 | <i>ROBO2</i>   | c.73_75delinsATC      | p.Val25Ile           | 0.234 | 184 | 43 |   |   | WES |
| MCL18 | <i>RYR1</i>    | c.14039G>A            | p.Arg4680Gln         | 0.148 | 27  | 4  | D | D | WES |
| MCL18 | <i>RYR1</i>    | c.3161C>T             | p.Pro1054Leu         | 0.108 | 37  | 4  | D | B | WES |
| MCL18 | <i>RYR1</i>    | c.13836G>A            | p.Trp4612Ter         | 0.108 | 37  | 4  |   |   | WES |
| MCL18 | <i>SETD2</i>   | c.1270C>T             | p.Arg424Ter          | 0.172 | 29  | 5  |   |   | WES |

|       |                 |                |                     |       |     |     |   |   |     |
|-------|-----------------|----------------|---------------------|-------|-----|-----|---|---|-----|
| MCL18 | <i>SMC1A</i>    | c.3406G>A      | p.Ala1136Thr        | 0.154 | 26  | 4   | D | D | WES |
| MCL18 | <i>SP140</i>    | c.1712G>A      | p.Arg571Gln         | 0.174 | 23  | 4   | T | P | WES |
| MCL18 | <i>SPEN</i>     | c.3410G>A      | p.Arg1137His        | 0.118 | 34  | 4   | T | B | WES |
| MCL18 | <i>SYNE1</i>    | c.298G>A       | p.Glu100Lys         | 0.154 | 26  | 4   | T | D | WES |
| MCL18 | <i>TBC1D26</i>  | c.481C>A       | p.Gln161Lys         | 0.114 | 35  | 4   | D | B | WES |
| MCL18 | <i>TBL1XR1</i>  | c.497G>A       | p.Arg166Gln         | 0.224 | 67  | 15  | T | B | WES |
| MCL18 | <i>TERT</i>     | c.1589C>T      | p.Pro530Leu         | 0.154 | 26  | 4   | D | D | WES |
| MCL18 | <i>TNRC6B</i>   | c.2654G>A      | p.Arg885Gln         | 0.111 | 36  | 4   | D | D | WES |
| MCL18 | <i>TRAF3</i>    | c.1283G>A      | p.Arg428Gln         | 0.138 | 29  | 4   | D | D | WES |
| MCL18 | <i>UBR5</i>     | c.8275_8345del | p.Asp2759SerfsTer10 | 0.106 | 47  | 5   |   |   | WES |
| MCL18 | <i>WHSC1</i>    | c.3211G>A      | p.Asp1071Asn        | 0.125 | 32  | 4   | T | B | WES |
| MCL18 | <i>YLPM1</i>    | c.4381_4382del | p.Gln1461ArgfsTer21 | 0.103 | 39  | 4   |   |   | WES |
| MCL18 | <i>ZRSR2</i>    | c.356_359del   | p.Arg119LysfsTer45  | 0.750 | 20  | 15  |   |   | WES |
| MCL19 | <i>KMT2A</i>    | c.838_839insT  | p.Pro280LeufsTer5   | 0.143 | 42  | 6   |   |   | TPS |
| MCL19 | <i>PDCD1LG2</i> | c.584G>A       | p.Trp195Ter         | 0.583 | 96  | 56  |   |   | TPS |
| MCL19 | <i>SYNE1</i>    | c.16339C>T     | p.Arg5447Trp        | 0.484 | 126 | 61  | D | D | TPS |
| MCL19 | <i>BTG2</i>     | c.443C>G       | p.Pro148Arg         | 0.479 | 292 | 140 | D | P | TPS |
| MCL19 | <i>MUC16</i>    | c.12154A>T     | p.Thr4052Ser        | 0.500 | 110 | 55  | D | P | TPS |
| MCL19 | <i>PRDM15</i>   | c.1382A>G      | p.Lys461Arg         | 0.280 | 50  | 14  | D | D | TPS |
| MCL19 | <i>KIAA1671</i> | c.4795G>A      | p.Val1599Met        | 0.307 | 127 | 39  | D | D | TPS |
| MCL19 | <i>SI</i>       | c.3875A>G      | p.Tyr1292Cys        | 0.610 | 82  | 50  | D | D | TPS |
| MCL19 | <i>ACTB</i>     | c.985-9C>T     |                     | 0.640 | 175 | 112 |   |   | TPS |
| MCL19 | <i>COL14A1</i>  | c.4621G>A      | p.Val1541Ile        | 0.615 | 65  | 40  | T | B | TPS |
| MCL19 | <i>NOTCH1</i>   | c.3553G>A      | p.Asp1185Asn        | 0.471 | 444 | 209 | T | B | TPS |

|        |                 |                  |                   |       |      |      |   |   |     |
|--------|-----------------|------------------|-------------------|-------|------|------|---|---|-----|
| MCL20* | <i>ANK2</i>     | c.10900G>A       | p.Val3634Ile      | 0.509 | 165  | 84   | T | B | TPS |
| MCL20* | <i>SLC3A2</i>   | c.128G>C         | p.Cys43Ser        | 0.389 | 72   | 28   | T | P | TPS |
| MCL20* | <i>ATM</i>      | c.8839A>T        | p.Thr2947Ser      | 0.242 | 248  | 60   | D | D | TPS |
| MCL20* | <i>ARID2</i>    | c.2806G>T        | p.Gly936Cys       | 0.528 | 233  | 123  | D | D | TPS |
| MCL20* | <i>LRIG3</i>    | c.2431G>A        | p.Val811Met       | 0.390 | 310  | 121  | D | D | TPS |
| MCL20* | <i>CXCR4</i>    | c.685T>A         | p.Ser229Thr       | 0.472 | 2547 | 1202 | D | B | TPS |
| MCL20* | <i>MAP1B</i>    | c.2738A>C        | p.Glu913Ala       | 0.471 | 342  | 161  | D | D | TPS |
| MCL20* | <i>ATP10B</i>   | c.1237A>G        | p.Ile413Val       | 0.440 | 193  | 85   | T | B | TPS |
| MCL20* | <i>SYNE1</i>    | c.12616G>A       | p.Ala4206Thr      | 0.538 | 158  | 85   | D | D | TPS |
| MCL20* | <i>SYNE1</i>    | c.4215C>A        | p.Asn1405Lys      | 0.505 | 204  | 103  | T | P | TPS |
| MCL21† | <i>TP53</i>     | c.488A>G         | p.Tyr163Cys       | 0.945 | 182  | 172  | D | D | TPS |
| MCL21† | <i>ZNF429</i>   | c.1978A>T        | p.Arg660Ter       | 0.238 | 63   | 15   |   |   | TPS |
| MCL21† | <i>RELN</i>     | c.1984_1985delAT | p.Met662ValfsTer4 | 0.386 | 70   | 27   |   |   | TPS |
| MCL21† | <i>DLGAP2</i>   | c.371G>T         | p.Arg124Leu       | 0.551 | 287  | 158  | D | D | TPS |
| MCL21† | <i>CDKN2A</i>   | c.-33G>C         |                   | 0.615 | 78   | 48   |   |   | TPS |
| MCL21† | <i>NOTCH2</i>   | c.3943A>T        | p.Asn1315Tyr      | 0.462 | 130  | 60   | D | D | TPS |
| MCL21† | <i>KMT2D</i>    | c.11331G>A       | p.Met3777Ile      | 0.310 | 29   | 9    | D | B | TPS |
| MCL21† | <i>SH2B3</i>    | c.1703T>C        | p.Ile568Thr       | 0.390 | 77   | 30   | D | D | TPS |
| MCL21† | <i>TCF3</i>     | c.1948C>A        | p.Pro650Thr       | 0.473 | 91   | 43   | T | D | TPS |
| MCL21† | <i>CACNA2D3</i> | c.1066G>A        | p.Gly356Arg       | 1.000 | 40   | 40   | T | B | TPS |
| MCL21† | <i>MAP1B</i>    | c.3001G>A        | p.Glu1001Lys      | 0.328 | 125  | 41   | D | D | TPS |
| MCL21† | <i>KMT2C</i>    | c.11074G>A       | p.Ala3692Thr      | 0.423 | 130  | 55   | T | B | TPS |
| MCL22† | <i>ETV6</i>     | c.33+1G>A        |                   | 0.374 | 195  | 73   |   |   | TPS |
| MCL22† | <i>FAT1</i>     | c.1delA          | p.Met1?           | 0.351 | 37   | 13   |   |   | TPS |

|        |                |             |                    |       |     |     |   |   |     |
|--------|----------------|-------------|--------------------|-------|-----|-----|---|---|-----|
| MCL22† | <i>TMSB4X</i>  | c.97G>T     | p.Glu33Ter         | 0.518 | 139 | 72  |   |   | TPS |
| MCL22† | <i>PDLIM3</i>  | c.317A>C    | p.Glu106Ala        | 0.473 | 74  | 35  | T | D | TPS |
| MCL22† | <i>ATRX</i>    | c.1964G>A   | p.Arg655Lys        | 0.203 | 79  | 16  | D | D | TPS |
| MCL22† | <i>MEF2B</i>   | c.248A>C    | p.Asp83Ala         | 0.424 | 403 | 171 | D | D | TPS |
| MCL22† | <i>DSEL</i>    | c.887C>A    | p.Ser296Tyr        | 0.219 | 96  | 21  | T | D | TPS |
| MCL22† | <i>IGLL5</i>   | c.161C>T    | p.Ala54Val         | 0.462 | 481 | 222 | D | B | TPS |
| MCL22† | <i>SYK</i>     | c.1054T>C   | p.Tyr352His        | 0.693 | 150 | 104 | D | D | TPS |
| MCL22† | <i>ABCA6</i>   | c.2195C>A   | p.Pro732His        | 0.514 | 105 | 54  | D | D | TPS |
| MCL22† | <i>PHLPP1</i>  | c.1864A>G   | p.Thr622Ala        | 0.300 | 90  | 27  | T | D | TPS |
| MCL22† | <i>DNMT3B</i>  | c.1603G>A   | p.Val535Ile        | 0.443 | 567 | 251 | T | B | TPS |
| MCL22† | <i>CRYBG3</i>  | c.568T>A    | p.Ser190Thr        | 0.607 | 135 | 82  |   | D | TPS |
| MCL22† | <i>FAT1</i>    | c.12670G>A  | p.Ala4224Thr       | 0.487 | 76  | 37  | T | B | TPS |
| MCL22† | <i>FAT1</i>    | c.367C>T    | p.Leu123Phe        | 0.611 | 72  | 44  | D | B | TPS |
| MCL22† | <i>SYNE1</i>   | c.13903G>C  | p.Val4635Leu       | 0.508 | 63  | 32  | T | B | TPS |
| MCL22† | <i>SYNE1</i>   | c.10060G>A  | p.Val3354Ile       | 0.685 | 73  | 50  | D | B | TPS |
| MCL22† | <i>EZH2</i>    | c.1546+7A>G |                    | 0.855 | 69  | 59  |   |   | TPS |
| MCL23* | <i>FAS</i>     | c.3G>A      | p.Met1?            | 0.327 | 615 | 201 | D | B | TPS |
| MCL23* | <i>FBXW7</i>   | c.1418+1G>A |                    | 0.367 | 463 | 170 |   |   | TPS |
| MCL23* | <i>PIMI</i>    | c.379C>T    | p.Gln127Ter        | 0.286 | 971 | 278 |   |   | TPS |
| MCL23* | <i>CCND3</i>   | c.811dupC   | p.Arg271ProfsTer53 | 0.248 | 750 | 186 |   |   | TPS |
| MCL23* | <i>PRDM1</i>   | c.291+1G>A  |                    | 0.515 | 262 | 135 |   |   | TPS |
| MCL23* | <i>ABCA7</i>   | c.3148-5C>G |                    | 0.528 | 388 | 205 |   |   | TPS |
| MCL23* | <i>FLG</i>     | c.2431G>A   | p.Gly811Arg        | 0.256 | 618 | 158 | D | D | TPS |
| MCL23* | <i>SLC16A7</i> | c.1308G>T   | p.Arg436Ser        | 0.327 | 627 | 205 | T | B | TPS |



|        |               |            |                   |       |      |     |   |   |     |
|--------|---------------|------------|-------------------|-------|------|-----|---|---|-----|
| MCL23* | <i>B2M</i>    | c.67+4A>T  |                   | 0.511 | 309  | 158 |   |   | TPS |
| MCL23* | <i>IGLL5</i>  | c.26G>C    | p.Gly9Ala         | 0.340 | 1117 | 380 | T | B | TPS |
| MCL23* | <i>ROBO2</i>  | c.3064A>C  | p.Asn1022His      | 0.235 | 616  | 145 | T | D | TPS |
| MCL23* | <i>IRF4</i>   | c.-2G>T    |                   | 0.338 | 999  | 338 |   |   | TPS |
| MCL23* | <i>PIMI</i>   | c.72G>C    | p.Lys24Asn        | 0.350 | 635  | 222 | T | B | TPS |
| MCL23* | <i>PRDMI</i>  | c.62C>T    | p.Ser21Phe        | 0.540 | 352  | 190 | D | B | TPS |
| MCL23* | <i>CARD11</i> | c.1159G>T  | p.Asp387Tyr       | 0.634 | 388  | 246 | D | D | TPS |
| MCL23* | <i>KMT2C</i>  | c.8069A>T  | p.Asp2690Val      | 0.409 | 470  | 192 | D | D | TPS |
| MCL23* | <i>MYC</i>    | c.475C>T   | p.Leu159Phe       | 0.289 | 761  | 220 | D | D | TPS |
| MCL23* | <i>FIGN</i>   | c.1531G>A  | p.Ala511Thr       | 0.442 | 231  | 102 | T | D | TPS |
| MCL23* | <i>IGLL5</i>  | c.173G>A   | p.Ser58Asn        | 0.349 | 459  | 160 | D | B | TPS |
| MCL23* | <i>IGLL5</i>  | c.182C>T   | p.Ser61Phe        | 0.399 | 439  | 175 | T | B | TPS |
| MCL23* | <i>OR5H1</i>  | c.454G>C   | p.Gly152Arg       | 0.184 | 515  | 95  | D | D | TPS |
| MCL23* | <i>SI</i>     | c.4999G>A  | p.Val1667Ile      | 0.337 | 552  | 186 | T | B | TPS |
| MCL23* | <i>ANK2</i>   | c.6073G>A  | p.Gly2025Ser      | 0.515 | 571  | 294 | T | B | TPS |
| MCL23* | <i>ANK2</i>   | c.10019A>G | p.Asp3340Gly      | 0.437 | 389  | 170 | T | B | TPS |
| MCL23* | <i>PDLIM3</i> | c.14T>C    | p.Val5Ala         | 0.475 | 448  | 213 | D | D | TPS |
| MCL23* | <i>MAP1B</i>  | c.4198A>G  | p.Ser1400Gly      | 0.526 | 310  | 163 | D | P | TPS |
| MCL23* | <i>PCLO</i>   | c.3539T>C  | p.Leu1180Pro      | 0.452 | 651  | 294 | T | B | TPS |
| MCL24† | <i>ATM</i>    | c.2296A>T  | p.Lys766Ter       | 0.583 | 24   | 14  |   |   | TPS |
| MCL24† | <i>NFKBIE</i> | c.762C>A   | p.Tyr254Ter       | 0.386 | 874  | 337 |   |   | TPS |
| MCL24† | <i>SEN6</i>   | c.1604dupG | p.Val536SerfsTer3 | 0.121 | 33   | 4   |   |   | TPS |
| MCL24† | <i>FLG</i>    | c.5368C>T  | p.Gln1790Ter      | 0.495 | 764  | 378 |   |   | TPS |
| MCL24† | <i>ZNF429</i> | c.778A>G   | p.Lys260Glu       | 0.172 | 29   | 5   | T | B | TPS |

|        |                |                                           |                          |       |      |     |   |   |     |
|--------|----------------|-------------------------------------------|--------------------------|-------|------|-----|---|---|-----|
| MCL24† | <i>CRYBG3</i>  | c.1211C>T                                 | p.Thr404Ile              | 0.535 | 86   | 46  |   | B | TPS |
| MCL24† | <i>PKHD1L1</i> | c.12083C>G                                | p.Ala4028Gly             | 0.548 | 135  | 74  | D | D | TPS |
| MCL24† | <i>YLPM1</i>   | c.3004C>T                                 | p.Arg1002Trp             | 0.577 | 71   | 41  |   | B | TPS |
| MCL24† | <i>ANKRD44</i> | c.1766C>T                                 | p.Ser589Leu              | 0.392 | 278  | 109 | T | P | TPS |
| MCL24† | <i>COL6A3</i>  | c.6592-3C>T                               |                          | 0.465 | 256  | 119 |   |   | TPS |
| MCL24† | <i>ESX1</i>    | c.1013_1039dupGTGTGCCACCCGGGCCGCCCATGGCGC | p.Arg338_Ala346dup       | 0.888 | 250  | 222 |   |   | TPS |
| MCL25† | <i>CD79A</i>   | c.546_548delTGA                           | p.Tyr182_Glu183delinsTer | 0.282 | 71   | 20  |   |   | TPS |
| MCL25† | <i>SP140</i>   | c.2112T>A                                 | p.Cys704Ter              | 0.421 | 423  | 178 |   |   | TPS |
| MCL25† | <i>EWSR1</i>   | c.1834C>T                                 | p.Arg612Ter              | 0.736 | 802  | 590 |   |   | TPS |
| MCL25† | <i>KCNH6</i>   | c.2213_2216delTTCT                        | p.Phe738SerfsTer48       | 0.365 | 211  | 77  |   |   | TPS |
| MCL25† | <i>NFKBIE</i>  | c.139delC                                 | p.Arg47AlafsTer2         | 0.473 | 514  | 243 |   |   | TPS |
| MCL25† | <i>COL11A2</i> | c.539G>A                                  | p.Arg180His              | 0.413 | 143  | 59  | T | B | TPS |
| MCL25† | <i>BLM</i>     | c.1044G>A                                 | p.Met348Ile              | 0.427 | 117  | 50  | D | B | TPS |
| MCL25† | <i>FAT4</i>    | c.13285G>T                                | p.Asp4429Tyr             | 0.379 | 850  | 322 | D | P | TPS |
| MCL25† | <i>MAP3K14</i> | c.1868C>T                                 | p.Pro623Leu              | 0.502 | 1309 | 657 |   |   | TPS |
| MCL25† | <i>U2AF2</i>   | c.691G>A                                  | p.Asp231Asn              | 0.371 | 224  | 83  | D | D | TPS |
| MCL25† | <i>MAP2</i>    | c.4651C>T                                 | p.Arg1551Trp             | 0.450 | 209  | 94  | D | D | TPS |
| MCL25† | <i>KMT2C</i>   | c.2698G>C                                 | p.Gly900Arg              | 0.383 | 120  | 46  | D | D | TPS |
| MCL25† | <i>TYK2</i>    | c.2098C>T                                 | p.Arg700Trp              | 0.486 | 1250 | 608 | D | D | TPS |
| MCL25† | <i>PKHD1L1</i> | c.11590C>T                                | p.Arg3864Cys             | 0.534 | 73   | 39  | D | D | TPS |
| MCL25† | <i>ARID1A</i>  | c.6707G>A                                 | p.Arg2236His             | 0.369 | 1459 | 538 | D | D | TPS |
| MCL25† | <i>CDH23</i>   | c.3352G>A                                 | p.Gly1118Ser             | 0.532 | 725  | 386 |   | B | TPS |
| MCL25† | <i>MMP8</i>    | c.378G>C                                  | p.Glu126Asp              | 0.458 | 166  | 76  | D | B | TPS |

|        |                 |             |                    |       |      |      |   |   |     |
|--------|-----------------|-------------|--------------------|-------|------|------|---|---|-----|
| MCL25† | <i>ETV6</i>     | c.572G>T    | p.Arg191Leu        | 0.459 | 628  | 288  | D | B | TPS |
| MCL25† | <i>SRRM2</i>    | c.5834G>A   | p.Arg1945His       | 0.457 | 819  | 374  |   | D | TPS |
| MCL25† | <i>ABCA6</i>    | c.1830C>A   | p.Asn610Lys        | 0.571 | 42   | 24   | T | B | TPS |
| MCL25† | <i>TCF3</i>     | c.1948C>A   | p.Pro650Thr        | 0.487 | 1593 | 775  | T | D | TPS |
| MCL25† | <i>MAP1B</i>    | c.3166G>A   | p.Gly1056Ser       | 0.460 | 315  | 145  | T | B | TPS |
| MCL25† | <i>HEPH</i>     | c.1490+6G>C |                    | 0.805 | 77   | 62   |   |   | TPS |
| MCL25† | <i>TP53</i>     | c.524G>A    | p.Arg175His        | 0.867 | 1470 | 1274 | D | D | TPS |
| MCL25† | <i>BIRC3</i>    | c.1325-1G>A |                    | 0.333 | 12   | 4    |   |   | TPS |
| MCL25† | <i>ZNF608</i>   | c.3956delC  | p.Pro1319LeufsTer2 | 0.390 | 172  | 67   |   |   | TPS |
| MCL25† | <i>CDH23</i>    | c.4663C>T   | p.Arg1555Cys       | 0.457 | 854  | 390  |   | D | TPS |
| MCL25† | <i>ATM</i>      | c.5063T>C   | p.Ile1688Thr       | 0.836 | 61   | 51   | D | B | TPS |
| MCL25† | <i>PRDM15</i>   | c.3533G>A   | p.Ser1178Asn       | 0.380 | 440  | 167  | T | D | TPS |
| MCL25† | <i>PCDHGA12</i> | c.275G>A    | p.Arg92Gln         | 0.517 | 786  | 406  | D | D | TPS |
| MCL25† | <i>CARD11</i>   | c.1079T>C   | p.Met360Thr        | 0.491 | 613  | 301  | D | B | TPS |
| MCL25† | <i>POT1</i>     | c.259C>G    | p.Gln87Glu         | 0.148 | 81   | 12   | T | P | TPS |
| MCL25† | <i>KMT2D</i>    | c.14581G>A  | p.Asp4861Asn       | 0.392 | 334  | 131  | D | D | TPS |
| MCL25† | <i>ZFX3</i>     | c.197C>T    | p.Ala66Val         | 0.429 | 730  | 313  | T | B | TPS |
| MCL25† | <i>WHSC1</i>    | c.3295G>A   | p.Glu1099Lys       | 0.461 | 380  | 175  | D | D | TPS |
| MCL25† | <i>RELN</i>     | c.8212C>T   | p.Arg2738Trp       | 0.488 | 203  | 99   | D | D | TPS |
| MCL26† | <i>ATM</i>      | c.4176dupT  | p.Ile1393TyrfsTer6 | 0.733 | 30   | 22   |   |   | TPS |
| MCL26† | <i>HOXB2</i>    | c.569G>A    | p.Trp190Ter        | 0.425 | 1077 | 458  |   |   | TPS |
| MCL26† | <i>PRDM1</i>    | c.351delA   | p.Ile117MetfsTer46 | 0.493 | 71   | 35   |   |   | TPS |
| MCL26† | <i>BRCA2</i>    | c.572A>T    | p.Asp191Val        | 0.348 | 69   | 24   | D | D | TPS |

|        |                |                                             |                      |       |      |     |   |  |   |     |
|--------|----------------|---------------------------------------------|----------------------|-------|------|-----|---|--|---|-----|
| MCL26† | <i>ESX1</i>    | c.1013_1039dupGTGTGCCACCCGGGCCGCCCATGGCGC   | p.Arg338_Ala346dup   | 0.709 | 117  | 83  |   |  |   | TPS |
| MCL26† | <i>ATRX</i>    | c.6026C>T                                   | p.Ala2009Val         | 0.182 | 22   | 4   | T |  | P | TPS |
| MCL26† | <i>SMARCA4</i> | c.3713C>T                                   | p.Ser1238Phe         | 0.363 | 2244 | 815 | D |  | D | TPS |
| MCL26† | <i>CRYBG3</i>  | c.7394C>T                                   | p.Pro2465Leu         | 0.548 | 31   | 17  |   |  | P | TPS |
| MCL26† | <i>TRAF2</i>   | c.797C>T                                    | p.Ser266Leu          | 0.480 | 1512 | 726 | T |  | B | TPS |
| MCL26† | <i>ZFHX3</i>   | c.10445G>T                                  | p.Ser3482Ile         | 0.461 | 1021 | 471 | D |  | B | TPS |
| MCL26† | <i>ABCA7</i>   | c.805G>A                                    | p.Glu269Lys          | 0.485 | 981  | 476 | T |  | B | TPS |
| MCL26† | <i>IKBKB</i>   | c.1031C>T                                   | p.Thr344Met          | 0.412 | 798  | 329 | D |  | D | TPS |
| MCL26† | <i>ABL1</i>    | c.1678G>A                                   | p.Asp560Asn          | 0.431 | 520  | 224 | T |  | B | TPS |
| MCL26† | <i>PCLO</i>    | c.1124_1125delinsCTCTTGGTCCTGCTACCTCCCTCCAC | p.Gln375delinsProLeu | 0.179 | 106  | 19  |   |  |   | WES |
| MCL26† | <i>ABCA7</i>   | c.805G>A                                    | p.Glu269Lys          | 0.501 | 515  | 258 | T |  | B | WES |
| MCL26† | <i>ABL1</i>    | c.1735G>A                                   | p.Asp579Asn          | 0.370 | 81   | 30  | T |  | B | WES |
| MCL26† | <i>ATM</i>     | c.4176dup                                   | p.Ile1393TyrfsTer6   | 0.500 | 14   | 7   |   |  |   | WES |
| MCL26† | <i>BRC A2</i>  | c.572A>T                                    | p.Asp191Val          | 0.604 | 53   | 32  | D |  | D | WES |
| MCL26† | <i>CRYBG3</i>  | c.7394C>T                                   | p.Pro2465Leu         | 0.500 | 22   | 11  |   |  | P | WES |
| MCL26† | <i>DLC1</i>    | c.762_763delinsCG                           | p.GlnAsn254HisAsp    | 0.964 | 28   | 27  |   |  |   | WES |
| MCL26† | <i>HOXB2</i>   | c.569G>A   .                                | p.Trp190Ter          | 0.388 | 338  | 131 |   |  |   | WES |
| MCL26† | <i>IKBKB</i>   | c.1031C>T                                   | p.Thr344Met          | 0.403 | 72   | 29  | D |  | D | WES |
| MCL26† | <i>KMT2C</i>   | c.1181G>A                                   | p.Cys394Tyr          | 0.113 | 124  | 14  | D |  | D | WES |
| MCL26† | <i>LRP1B</i>   | c.9191G>A                                   | p.Arg3064Gln         | 0.133 | 30   | 4   | T |  | D | WES |
| MCL26† | <i>MAP3K14</i> | c.763C>T                                    | p.Arg255Cys          | 0.505 | 101  | 51  |   |  | B | WES |
| MCL26† | <i>PCLO</i>    | c.8780_8781ins                              | p.Asp2926_Glu2927ins | 0.351 | 37   | 13  |   |  |   | WES |

|        |                |                                           |                    |       |      |     |   |   |     |
|--------|----------------|-------------------------------------------|--------------------|-------|------|-----|---|---|-----|
| MCL26† | <i>PRDM1</i>   | c.351del                                  | p.Ile117MetfsTer46 | 0.394 | 33   | 13  |   |   | WES |
| MCL26† | <i>RIMS2</i>   | c.476C>A                                  | p.Pro159Gln        | 0.167 | 24   | 4   | D | P | WES |
| MCL26† | <i>ROBO2</i>   | c.73_75delinsATC                          | p.Val25Ile         | 0.129 | 85   | 11  |   |   | WES |
| MCL26† | <i>SIPRI</i>   | c.851_862del                              | p.Val284_Cys287del | 0.313 | 96   | 30  |   |   | WES |
| MCL26† | <i>SMARCA4</i> | c.3713C>T                                 | p.Ser1238Phe       | 0.353 | 383  | 135 | D | D | WES |
| MCL26† | <i>SYNE1</i>   | c.12149_12150delinsGT                     | p.Lys4050Ser       | 0.546 | 22   | 12  |   |   | WES |
| MCL26† | <i>TCF3</i>    | c.1291_1293delinsAGT                      | p.Gly431Ser        | 0.427 | 150  | 64  |   |   | WES |
| MCL26† | <i>TRAF2</i>   | c.797C>T                                  | p.Ser266Leu        | 0.468 | 284  | 133 | T | B | WES |
| MCL26† | <i>UBR5</i>    | c.619C>T                                  | p.Arg207Ter        | 0.167 | 24   | 4   |   |   | WES |
| MCL26† | <i>YLP1</i>    | c.961G>A                                  | p.Val321Met        | 0.108 | 37   | 4   | D | B | WES |
| MCL26† | <i>ZFH3</i>    | c.10445G>T                                | p.Ser3482Ile       | 0.446 | 413  | 184 | D | B | WES |
| MCL27  | <i>CHEK2</i>   | c.538C>T                                  | p.Arg180Cys        | 0.458 | 48   | 22  | D | P | TPS |
| MCL27  | <i>CDH23</i>   | c.8401T>G                                 | p.Phe2801Val       | 0.525 | 566  | 297 | T | B | TPS |
| MCL27  | <i>ESX1</i>    | c.1013_1039dupGTGTGCCACCCGGGCCGCCCATGGCGC | p.Arg338_Ala346dup | 0.750 | 52   | 39  |   |   | TPS |
| MCL27  | <i>ATM</i>     | c.7280T>G                                 | p.Leu2427Arg       | 0.548 | 31   | 17  | D | D | TPS |
| MCL27  | <i>CREBBP</i>  | c.3060+5G>A                               |                    | 0.258 | 256  | 66  |   |   | TPS |
| MCL27  | <i>SMARCA4</i> | c.1679A>G                                 | p.Tyr560Cys        | 0.359 | 1114 | 400 | D | D | TPS |
| MCL27  | <i>ZNF90</i>   | c.1601C>A                                 | p.Ala534Glu        | 0.360 | 25   | 9   | T | B | TPS |
| MCL27  | <i>LRP1B</i>   | c.12515-7T>A                              |                    | 0.167 | 12   | 2   |   |   | TPS |
| MCL27  | <i>WHSC1</i>   | c.3448A>G                                 | p.Thr1150Ala       | 0.310 | 387  | 120 | D | D | TPS |
| MCL27  | <i>PCLO</i>    | c.7220C>T                                 | p.Pro2407Leu       | 0.409 | 137  | 56  | T | B | TPS |
| MCL27  | <i>COL4A2</i>  | c.5033C>T                                 | p.Thr1678Ile       | 0.409 | 1337 | 547 | D | D | TPS |
| MCL27  | <i>MKI67</i>   | c.3254T>A                                 | p.Met1085Lys       | 0.495 | 109  | 54  | T | B | TPS |

|        |                |                        |                     |       |      |     |   |   |     |
|--------|----------------|------------------------|---------------------|-------|------|-----|---|---|-----|
| MCL27  | <i>LRRK1</i>   | c.261+6G>A             |                     | 0.511 | 1894 | 967 |   |   | TPS |
| MCL27  | <i>TCF3</i>    | c.1564A>C              | p.Lys522Gln         | 0.547 | 519  | 284 | T | B | TPS |
| MCL27  | <i>CARD6</i>   | c.372G>C               | p.Gln124His         | 0.421 | 19   | 8   | D | B | TPS |
| MCL27  | <i>ACTB</i>    | c.124-7T>A             |                     | 0.390 | 336  | 131 |   |   | TPS |
| MCL28* | <i>ATM</i>     | c.6404dupT             | p.Arg2136LysfsTer10 | 0.638 | 552  | 352 |   |   | TPS |
| MCL28* | <i>NFKBIE</i>  | c.759_762delTTAC       | p.Tyr254SerfsTer13  | 0.401 | 968  | 388 |   |   | TPS |
| MCL28* | <i>SYNE1</i>   | c.7734-12_7734-11delCC |                     | 0.275 | 40   | 11  |   |   | TPS |
| MCL28* | <i>LRRK1</i>   | c.763G>A               | p.Ala255Thr         | 0.523 | 511  | 267 | T | B | TPS |
| MCL28* | <i>CARD11</i>  | c.1202A>T              | p.Asp401Val         | 0.405 | 437  | 177 | D | D | TPS |
| MCL28* | <i>PKHD1L1</i> | c.6329C>T              | p.Thr2110Ile        | 0.468 | 410  | 192 | D | P | TPS |
| MCL28* | <i>NOTCH2</i>  | c.710G>A               | p.Arg237Gln         | 0.506 | 245  | 124 | T | P | TPS |
| MCL28* | <i>MKI67</i>   | c.9544C>G              | p.Leu3182Val        | 0.491 | 285  | 140 | T | P | TPS |
| MCL28* | <i>KLHL14</i>  | c.1099G>A              | p.Val367Ile         | 0.451 | 566  | 255 | T | D | TPS |
| MCL28* | <i>CRYBG3</i>  | c.899C>A               | p.Pro300Gln         | 0.469 | 565  | 265 |   | B | TPS |
| MCL28* | <i>TNFAIP3</i> | c.1274C>T              | p.Pro425Leu         | 0.323 | 1152 | 372 | T | B | TPS |
| MCL28* | <i>NOTCH1</i>  | c.4046C>T              | p.Ala1349Val        | 0.484 | 514  | 249 | T | P | TPS |
| MCL29† | <i>SMARCA4</i> | c.3403C>T              | p.Arg1135Trp        | 0.432 | 889  | 384 | D | D | TPS |
| MCL29† | <i>ARID1A</i>  | c.1903delA             | p.Arg635AspfsTer12  | 0.360 | 275  | 99  |   |   | TPS |
| MCL29† | <i>NFKBIE</i>  | c.759_762delTTAC       | p.Tyr254SerfsTer13  | 0.293 | 819  | 240 |   |   | TPS |
| MCL29† | <i>CHEK2</i>   | c.538C>T               | p.Arg180Cys         | 0.437 | 199  | 87  | D | P | TPS |
| MCL29† | <i>CHEK2</i>   | c.886G>T               | p.Asp296Tyr         | 0.657 | 35   | 23  | D | D | TPS |
| MCL29† | <i>CDH23</i>   | c.8401T>G              | p.Phe2801Val        | 0.538 | 1014 | 546 | T | B | TPS |
| MCL29† | <i>ATM</i>     | c.7280T>G              | p.Leu2427Arg        | 0.740 | 96   | 71  | D | D | TPS |
| MCL29† | <i>MKI67</i>   | c.3254T>A              | p.Met1085Lys        | 0.471 | 399  | 188 | T | B | TPS |

|        |               |                                             |                                                 |       |      |      |   |   |     |
|--------|---------------|---------------------------------------------|-------------------------------------------------|-------|------|------|---|---|-----|
| MCL29† | <i>LRRK1</i>  | c.261+6G>A                                  |                                                 | 0.306 | 3688 | 1127 |   |   | TPS |
| MCL29† | <i>GRIN2A</i> | c.418C>G                                    | p.Pro140Ala                                     | 0.461 | 258  | 119  | T | B | TPS |
| MCL29† | <i>TCF3</i>   | c.1564A>C                                   | p.Lys522Gln                                     | 0.515 | 482  | 248  | T | B | TPS |
| MCL29† | <i>CARD6</i>  | c.372G>C                                    | p.Gln124His                                     | 0.489 | 90   | 44   | D | B | TPS |
| MCL29† | <i>ACTB</i>   | c.124-7T>A                                  |                                                 | 0.488 | 689  | 336  |   |   | TPS |
| MCL29† | <i>ESX1</i>   | c.1013_1039dupGTGTGCCACCCGGGCCGCCATGGCGC    | p.Arg338_Ala346dup                              | 0.653 | 98   | 64   |   |   | TPS |
| MCL29† | <i>PCLO</i>   | c.1124_1125delinsCTCTTGGTCCTGCTACCTCCCTCCAC | p.Gln375delinsProLeuGlyProAlaLysProProAlaGlnHis | 0.181 | 177  | 32   |   |   | WES |
| MCL29† | <i>ABCC9</i>  | c.1657G>T                                   | p.Ala553Ser                                     | 0.103 | 39   | 4    | D | B | WES |
| MCL29† | <i>ANK2</i>   | c.7267G>A                                   | p.Ala2423Thr                                    | 0.769 | 26   | 20   | D | B | WES |
| MCL29† | <i>ARID1A</i> | c.1903del                                   | p.Arg635AspfsTer12                              | 0.250 | 20   | 5    |   |   | WES |
| MCL29† | <i>ATM</i>    | c.7280T>G                                   | p.Leu2427Arg                                    | 0.929 | 14   | 13   | D | D | WES |
| MCL29† | <i>ATM</i>    | c.3349C>A                                   | p.Gln1117Lys                                    | 0.108 | 37   | 4    | T | B | WES |
| MCL29† | <i>ATRX</i>   | c.6236G>A                                   | p.Arg2079Gln                                    | 0.114 | 35   | 4    | D | D | WES |
| MCL29† | <i>CDH23</i>  | c.1681T>G                                   | p.Phe561Val                                     | 0.521 | 703  | 366  | T | B | WES |
| MCL29† | <i>CHEK2</i>  | c.667C>T                                    | p.Arg223Cys                                     | 0.476 | 42   | 20   | D | P | WES |
| MCL29† | <i>DLC1</i>   | c.762_763delinsCG                           | p.GlnAsn254HisAsp                               | 0.971 | 35   | 34   |   |   | WES |
| MCL29† | <i>E2F1</i>   | c.1171_1174delinsCC                         | p.Phe391ProfsTer6                               | 0.430 | 286  | 123  |   |   | WES |
| MCL29† | <i>FAT1</i>   | c.6276_6277ins                              | p.Val2092_Asp2093ins                            | 0.375 | 32   | 12   |   |   | WES |
| MCL29† | <i>GRIN2A</i> | c.418C>G                                    | p.Pro140Ala                                     | 0.707 | 41   | 29   | T | B | WES |
| MCL29† | <i>MKI67</i>  | c.4547_4550delinsAGCT                       | p.ArgPro1516GlnLeu                              | 0.961 | 51   | 49   |   |   | WES |
| MCL29† | <i>MKI67</i>  | c.2174T>A                                   | p.Met725Lys                                     | 0.427 | 82   | 35   | T | B | WES |
| MCL29† | <i>MPDZ</i>   | c.5242C>A                                   | p.Arg1748Ser                                    | 0.342 | 41   | 14   | D | D | WES |

|        |                 |                      |                    |       |     |     |   |   |     |
|--------|-----------------|----------------------|--------------------|-------|-----|-----|---|---|-----|
| MCL29† | <i>NFKBIE</i>   | c.759_762del         | p.Tyr254SerfsTer13 | 0.403 | 300 | 121 |   |   | WES |
| MCL29† | <i>NOTCH3</i>   | c.4552C>A            | p.Leu1518Met       | 0.497 | 330 | 164 | D | D | WES |
| MCL29† | <i>PCDHB2</i>   | c.2279_2280delinsAA  | p.Gly760Glu        | 0.324 | 34  | 11  |   |   | WES |
| MCL29† | <i>PCDHB2</i>   | c.2021_2022delinsCT  | p.Leu674Pro        | 0.266 | 218 | 58  |   |   | WES |
| MCL29† | <i>PCLO</i>     | c.7220C>T            | p.Pro2407Leu       | 0.455 | 11  | 5   | T | B | WES |
| MCL29† | <i>PKD1</i>     | c.2102C>A            | p.Thr701Asn        | 0.250 | 20  | 5   | T | P | WES |
| MCL29† | <i>RELN</i>     | c.7370G>A            | p.Arg2457His       | 0.143 | 28  | 4   | D | D | WES |
| MCL29† | <i>ROBO2</i>    | c.73_75delinsATC     | p.Val25Ile         | 0.163 | 92  | 15  |   |   | WES |
| MCL29† | <i>RYR1</i>     | c.10966A>G           | p.Ser3656Gly       | 0.479 | 242 | 116 | T | B | WES |
| MCL29† | <i>SMARCA4</i>  | c.3403C>T            | p.Arg1135Trp       | 0.354 | 311 | 110 | D | D | WES |
| MCL29† | <i>TCF3</i>     | c.1291_1293delinsAGT | p.Gly431Ser        | 0.946 | 186 | 176 |   |   | WES |
| MCL29† | <i>TCF3</i>     | c.1564A>C            | p.Lys522Gln        | 0.472 | 180 | 85  | T | B | WES |
| MCL29† | <i>ZNF117</i>   | c.1247T>C            | p.Leu416Pro        | 0.113 | 62  | 7   | T | B | WES |
| MCL30† | <i>SP140</i>    | c.2112T>A            | p.Cys704Ter        | 0.431 | 332 | 143 |   |   | TPS |
| MCL30† | <i>EWSR1</i>    | c.1834C>T            | p.Arg612Ter        | 0.684 | 500 | 342 |   |   | TPS |
| MCL30† | <i>NFKBIE</i>   | c.139delC            | p.Arg47AlafsTer2   | 0.468 | 509 | 238 |   |   | TPS |
| MCL30† | <i>COL11A2</i>  | c.539G>A             | p.Arg180His        | 0.399 | 158 | 63  | T | B | TPS |
| MCL30† | <i>BLM</i>      | c.1044G>A            | p.Met348Ile        | 0.314 | 51  | 16  | D | B | TPS |
| MCL30† | <i>FAT4</i>     | c.13285G>T           | p.Asp4429Tyr       | 0.413 | 560 | 231 | D | P | TPS |
| MCL30† | <i>DIS3</i>     | c.1462G>T            | p.Asp488Tyr        | 0.429 | 28  | 12  | D | D | TPS |
| MCL30† | <i>MAP3K14</i>  | c.1868C>T            | p.Pro623Leu        | 0.477 | 870 | 415 |   |   | TPS |
| MCL30† | <i>U2AF2</i>    | c.691G>A             | p.Asp231Asn        | 0.382 | 144 | 55  | D | D | TPS |
| MCL30† | <i>ATP6V1B2</i> | c.705+3A>G           |                    | 0.174 | 23  | 4   |   |   | TPS |
| MCL30† | <i>TYK2</i>     | c.2098C>T            | p.Arg700Trp        | 0.471 | 782 | 368 | D | D | TPS |



|        |                |              |              |       |      |      |   |   |     |
|--------|----------------|--------------|--------------|-------|------|------|---|---|-----|
| MCL30† | <i>PKHD1L1</i> | c.11590C>T   | p.Arg3864Cys | 0.333 | 36   | 12   | D | D | TPS |
| MCL30† | <i>ARID1A</i>  | c.6707G>A    | p.Arg2236His | 0.343 | 1068 | 366  | D | D | TPS |
| MCL30† | <i>CDH23</i>   | c.3352G>A    | p.Gly1118Ser | 0.479 | 495  | 237  |   | B | TPS |
| MCL30† | <i>MMP8</i>    | c.378G>C     | p.Glu126Asp  | 0.529 | 34   | 18   | D | B | TPS |
| MCL30† | <i>ETV6</i>    | c.572G>T     | p.Arg191Leu  | 0.472 | 527  | 249  | D | B | TPS |
| MCL30† | <i>SRRM2</i>   | c.5834G>A    | p.Arg1945His | 0.410 | 502  | 206  |   | D | TPS |
| MCL30† | <i>ABCA6</i>   | c.1830C>A    | p.Asn610Lys  | 0.520 | 25   | 13   | T | B | TPS |
| MCL30† | <i>TCF3</i>    | c.1948C>A    | p.Pro650Thr  | 0.499 | 1059 | 528  | T | D | TPS |
| MCL30† | <i>MAP1B</i>   | c.3166G>A    | p.Gly1056Ser | 0.484 | 281  | 136  | T | B | TPS |
| MCL30† | <i>HEPH</i>    | c.1490+6G>C  |              | 0.945 | 55   | 52   |   |   | TPS |
| MCL31  | <i>KMT2D</i>   | c.11347C>T   | p.Gln3783Ter | 0.439 | 1232 | 541  |   |   | TPS |
| MCL31  | <i>ABCC9</i>   | c.3669+10T>C |              | 0.506 | 89   | 45   |   |   | TPS |
| MCL31  | <i>COL6A3</i>  | c.92-6330C>T |              | 0.483 | 2728 | 1318 |   |   | TPS |
| MCL31  | <i>DNAH5</i>   | c.-8C>A      |              | 0.578 | 64   | 37   |   |   | TPS |
| MCL31  | <i>ABCA6</i>   | c.1052T>C    | p.Leu351Pro  | 0.518 | 83   | 43   | D | D | TPS |
| MCL31  | <i>ZNF521</i>  | c.3906+5T>C  |              | 0.400 | 40   | 16   |   |   | TPS |
| MCL31  | <i>DLGAP2</i>  | c.960G>C     | p.Lys320Asn  | 0.502 | 1967 | 987  | T | D | TPS |
| MCL31  | <i>UBR5</i>    | c.6631-11T>A |              | 0.211 | 19   | 4    |   |   | TPS |
| MCL31  | <i>SPEN</i>    | c.8399C>T    | p.Ala2800Val | 0.482 | 4602 | 2219 | D | B | TPS |
| MCL31  | <i>BCL10</i>   | c.485C>T     | p.Thr162Met  | 0.385 | 52   | 20   | D | D | TPS |
| MCL31  | <i>CDH23</i>   | c.3352G>A    | p.Gly1118Ser | 0.479 | 1479 | 708  |   | B | TPS |
| MCL31  | <i>KMT2A</i>   | c.218G>A     | p.Gly73Glu   | 0.503 | 547  | 275  | D | B | TPS |
| MCL31  | <i>NIN</i>     | c.1260-8C>T  |              | 0.383 | 47   | 18   |   |   | TPS |
| MCL31  | <i>MYBBP1A</i> | c.3203G>A    | p.Arg1068His | 0.501 | 1785 | 894  | D | P | TPS |

|        |                |                  |                    |       |     |     |   |   |     |
|--------|----------------|------------------|--------------------|-------|-----|-----|---|---|-----|
| MCL31  | <i>DNAH5</i>   | c.4855A>G        | p.Thr1619Ala       | 0.527 | 146 | 77  | T | B | TPS |
| MCL31  | <i>PLEKHG1</i> | c.2027G>A        | p.Arg676Gln        | 0.423 | 352 | 149 | D | D | TPS |
| MCL32† | <i>ATM</i>     | c.1402_1403delAA | p.Lys468GlufsTer18 | 0.845 | 328 | 277 |   |   | TPS |
| MCL32† | <i>NOTCH1</i>  | c.7378G>T        | p.Glu2460Ter       | 0.334 | 356 | 119 |   |   | TPS |
| MCL32† | <i>NFKBIE</i>  | c.139delC        | p.Arg47AlafsTer2   | 0.414 | 309 | 128 |   |   | TPS |
| MCL32† | <i>APC</i>     | c.757G>A         | p.Gly253Ser        | 0.483 | 971 | 469 | T | B | TPS |
| MCL32† | <i>COL11A2</i> | c.4229A>C        | p.Lys1410Thr       | 0.485 | 266 | 129 | D | D | TPS |
| MCL32† | <i>PLXNB3</i>  | c.2453G>A        | p.Arg818His        | 0.436 | 353 | 154 | D | P | TPS |
| MCL32† | <i>CDH23</i>   | c.8394C>G        | p.Ile2798Met       | 0.534 | 324 | 173 | T | B | TPS |
| MCL32† | <i>MKI67</i>   | c.655A>C         | p.Lys219Gln        | 0.482 | 691 | 333 | D | D | TPS |
| MCL32† | <i>ARID2</i>   | c.2806G>T        | p.Gly936Cys        | 0.489 | 364 | 178 | D | D | TPS |
| MCL32† | <i>LRP1B</i>   | c.2281A>G        | p.Ile761Val        | 0.475 | 375 | 178 | T | B | TPS |
| MCL32† | <i>EP300</i>   | c.5897G>T        | p.Gly1966Val       | 0.453 | 256 | 116 | T | P | TPS |
| MCL32† | <i>ANK2</i>    | c.7159G>C        | p.Ala2387Pro       | 0.437 | 357 | 156 | T | B | TPS |
| MCL32† | <i>ANK2</i>    | c.11320G>A       | p.Val3774Met       | 0.558 | 217 | 121 | D | D | TPS |
| MCL32† | <i>CD14</i>    | c.586C>T         | p.Leu196Phe        | 0.458 | 719 | 329 | D | D | TPS |
| MCL33* | <i>FBXW7</i>   | c.1418+1G>A      |                    | 0.176 | 170 | 30  |   |   | TPS |
| MCL33* | <i>CCND3</i>   | c.811dupC        | p.Arg271ProfsTer53 | 0.188 | 256 | 48  |   |   | TPS |
| MCL33* | <i>PRDMI</i>   | c.291+1G>A       |                    | 0.435 | 246 | 107 |   |   | TPS |
| MCL33* | <i>ABCA7</i>   | c.3148-5C>G      |                    | 0.482 | 139 | 67  |   |   | TPS |
| MCL33* | <i>IRF4</i>    | c.-2G>T          |                    | 0.332 | 340 | 113 |   |   | TPS |
| MCL33* | <i>PIM1</i>    | c.72G>C          | p.Lys24Asn         | 0.260 | 296 | 77  | T | B | TPS |
| MCL33* | <i>CARD11</i>  | c.1159G>T        | p.Asp387Tyr        | 0.750 | 96  | 72  | D | D | TPS |
| MCL33* | <i>KMT2C</i>   | c.8069A>T        | p.Asp2690Val       | 0.267 | 161 | 43  | D | D | TPS |

|        |               |                 |              |       |     |     |   |   |     |
|--------|---------------|-----------------|--------------|-------|-----|-----|---|---|-----|
| MCL33* | <i>FIGN</i>   | c.1531G>A       | p.Ala511Thr  | 0.419 | 74  | 31  | T | D | TPS |
| MCL33* | <i>IGLL5</i>  | c.173G>A        | p.Ser58Asn   | 0.457 | 267 | 122 | D | B | TPS |
| MCL33* | <i>IGLL5</i>  | c.182C>T        | p.Ser61Phe   | 0.398 | 256 | 102 | T | B | TPS |
| MCL33* | <i>SI</i>     | c.4999G>A       | p.Val1667Ile | 0.350 | 117 | 41  | T | B | TPS |
| MCL33* | <i>ANK2</i>   | c.6073G>A       | p.Gly2025Ser | 0.422 | 161 | 68  | T | B | TPS |
| MCL33* | <i>ANK2</i>   | c.10019A>G      | p.Asp3340Gly | 0.471 | 157 | 74  | T | B | TPS |
| MCL33* | <i>PDLIM3</i> | c.14T>C         | p.Val5Ala    | 0.402 | 117 | 47  | D | D | TPS |
| MCL33* | <i>MAP1B</i>  | c.4198A>G       | p.Ser1400Gly | 0.459 | 135 | 62  | D | P | TPS |
| MCL33* | <i>PCLO</i>   | c.3539T>C       | p.Leu1180Pro | 0.444 | 99  | 44  | T | B | TPS |
| MCL34  | <i>SPEN</i>   | c.3508C>T       | p.Arg1170Ter | 0.345 | 238 | 82  |   |   | TPS |
| MCL34  | <i>TRAF2</i>  | c.637C>T        | p.Arg213Ter  | 0.363 | 113 | 41  |   |   | TPS |
| MCL34  | <i>WDR66</i>  | c.25C>T         | p.Arg9Ter    | 0.353 | 156 | 55  |   |   | TPS |
| MCL34  | <i>TP53</i>   | c.821T>C        | p.Val274Ala  | 0.581 | 172 | 100 | D | P | TPS |
| MCL34  | <i>BCL9</i>   | c.808C>A        | p.Pro270Thr  | 0.453 | 106 | 48  | T | B | TPS |
| MCL34  | <i>BCL9</i>   | c.1255G>C       | p.Gly419Arg  | 0.378 | 82  | 31  | D | P | TPS |
| MCL34  | <i>CCND1</i>  | c.139T>A        | p.Cys47Ser   | 0.558 | 319 | 178 | T | B | TPS |
| MCL34  | <i>ARID1B</i> | c.1738-29732T>C |              | 0.353 | 133 | 47  | T | B | TPS |
| MCL34  | <i>KMT2C</i>  | c.11575G>A      | p.Glu3859Lys | 0.573 | 286 | 164 | D | D | TPS |
| MCL34  | <i>CTCF</i>   | c.1519-8C>T     |              | 0.459 | 61  | 28  |   |   | TPS |
| MCL35† | <i>MPEG1</i>  | c.445C>T        | p.Arg149Ter  | 0.246 | 69  | 17  |   |   | TPS |
| MCL35† | <i>ABCC9</i>  | c.2857G>A       | p.Glu953Lys  | 0.366 | 41  | 15  | T | P | TPS |
| MCL35† | <i>KMT2D</i>  | c.7490C>T       | p.Ala2497Val | 0.197 | 61  | 12  | D | P | TPS |
| MCL35† | <i>MEF2B</i>  | c.68A>G         | p.Lys23Arg   | 0.225 | 89  | 20  | D | D | TPS |
| MCL35† | <i>MTOR</i>   | c.5614-10G>C    |              | 0.298 | 84  | 25  |   |   | TPS |

|        |                |              |                  |       |     |     |   |   |     |
|--------|----------------|--------------|------------------|-------|-----|-----|---|---|-----|
| MCL35† | <i>MMP8</i>    | c.1177G>A    | p.Asp393Asn      | 0.273 | 11  | 3   | T | B | TPS |
| MCL35† | <i>DSC1</i>    | c.770C>T     | p.Ser257Phe      | 0.563 | 16  | 9   | T | B | TPS |
| MCL35† | <i>ZNF117</i>  | c.899G>C     | p.Ser300Thr      | 0.130 | 23  | 3   | T | B | TPS |
| MCL35† | <i>COL14A1</i> | c.3466G>A    | p.Glu1156Lys     | 0.194 | 36  | 7   | T | D | TPS |
| MCL35† | <i>HEATR1</i>  | c.5355+10G>A |                  | 0.214 | 42  | 9   |   |   | TPS |
| MCL35† | <i>ZFH3</i>    | c.10445G>T   | p.Ser3482Ile     | 0.317 | 63  | 20  | D | B | TPS |
| MCL35† | <i>MUC16</i>   | c.10543C>T   | p.His3515Tyr     | 0.527 | 55  | 29  | D | B | TPS |
| MCL35† | <i>NSD1</i>    | c.11C>A      | p.Thr4Asn        | 0.365 | 63  | 23  | D | B | TPS |
| MCL35† | <i>ABL1</i>    | c.172C>T     | p.Pro58Ser       | 0.281 | 64  | 18  | D | B | TPS |
| MCL35† | <i>NOTCH1</i>  | c.5870A>C    | p.Gln1957Pro     | 0.384 | 99  | 38  | D | B | TPS |
| MCL36† | <i>SIPRI</i>   | c.10dupA     | p.Thr4AsnfsTer15 | 0.269 | 104 | 28  |   |   | TPS |
| MCL36† | <i>ATP11C</i>  | c.3055C>T    | p.Arg1019Ter     | 0.261 | 23  | 6   |   |   | TPS |
| MCL36† | <i>COL4A2</i>  | c.5068G>A    | p.Ala1690Thr     | 0.327 | 101 | 33  | D | P | TPS |
| MCL36† | <i>ZNF85</i>   | c.1520C>G    | p.Thr507Arg      | 0.339 | 56  | 19  | D | D | TPS |
| MCL36† | <i>ARID1B</i>  | c.787A>T     | p.Met263Leu      | 0.409 | 269 | 110 | D | B | TPS |
| MCL36† | <i>SLC29A2</i> | c.475T>G     | p.Tyr159Asp      | 0.496 | 117 | 58  | D | D | TPS |
| MCL36† | <i>NAV3</i>    | c.3880G>A    | p.Gly1294Ser     | 0.349 | 83  | 29  | T | D | TPS |
| MCL36† | <i>WHSC1</i>   | c.3295G>A    | p.Glu1099Lys     | 0.208 | 96  | 20  | D | D | TPS |
| MCL36† | <i>FAT4</i>    | c.14929G>A   | p.Ala4977Thr     | 0.410 | 39  | 16  | T | B | TPS |
| MCL36† | <i>PALLD</i>   | c.1354G>A    | p.Val452Met      | 0.477 | 86  | 41  | D | D | TPS |
| MCL36† | <i>ABCA13</i>  | c.5888A>C    | p.Asn1963Thr     | 0.455 | 55  | 25  | D | P | TPS |
| MCL36† | <i>ABCA13</i>  | c.10327G>A   | p.Asp3443Asn     | 0.679 | 56  | 38  | T | D | TPS |
| MCL36† | <i>PKHD1L1</i> | c.3848A>G    | p.Gln1283Arg     | 0.478 | 46  | 22  | T | B | TPS |
| MCL36† | <i>SCRIB</i>   | c.641C>T     | p.Pro214Leu      | 0.159 | 88  | 14  | D | D | TPS |

|        |                |                    |                     |       |     |     |   |   |     |
|--------|----------------|--------------------|---------------------|-------|-----|-----|---|---|-----|
| MCL37† | <i>ARID1B</i>  | c.1650dupT         | p.Gly551TrpfsTer102 | 0.254 | 401 | 102 |   |   | TPS |
| MCL37† | <i>NOTCH1</i>  | c.6849_6850insGACG | p.Thr2284AspfsTer71 | 0.283 | 237 | 67  |   |   | TPS |
| MCL37† | <i>TP53</i>    | c.91G>A            | p.Val31Ile          | 0.444 | 54  | 24  | T | B | TPS |
| MCL37† | <i>CCND1</i>   | c.142G>A           | p.Val48Met          | 0.376 | 636 | 239 | D | D | TPS |
| MCL37† | <i>CCND1</i>   | c.149A>G           | p.Lys50Arg          | 0.379 | 625 | 237 | T | B | TPS |
| MCL37† | <i>SETD2</i>   | c.4715+9T>C        |                     | 0.450 | 222 | 100 |   |   | TPS |
| MCL37† | <i>KCNC2</i>   | c.512C>A           | p.Thr171Asn         | 0.427 | 583 | 249 | T | B | TPS |
| MCL37† | <i>PHLPP1</i>  | c.1864A>G          | p.Thr622Ala         | 0.459 | 185 | 85  | T | D | TPS |
| MCL37† | <i>DLC1</i>    | c.1349-3T>C        |                     | 0.460 | 139 | 64  |   |   | TPS |
| MCL37† | <i>COL14A1</i> | c.4637G>A          | p.Arg1546His        | 0.228 | 114 | 26  | T | D | TPS |
| MCL37† | <i>KDM4C</i>   | c.1304C>G          | p.Ala435Gly         | 0.459 | 364 | 167 | T | B | TPS |
| MCL37† | <i>PLXNB3</i>  | c.4861G>A          | p.Val1621Ile        | 0.459 | 194 | 89  | T | B | TPS |
| MCL37† | <i>ARID1A</i>  | c.3999_4001dup     | p.Gln1334dup        | 0.438 | 290 | 127 |   |   | WES |
| MCL37† | <i>ARID1B</i>  | c.1650dup          | p.Gly551TrpfsTer89  | 0.261 | 153 | 40  |   |   | WES |
| MCL37† | <i>CARD11</i>  | c.383C>T           | p.Thr128Met         | 0.182 | 77  | 14  | D | D | WES |
| MCL37† | <i>CCND1</i>   | c.142G>A           | p.Val48Met          | 0.292 | 178 | 52  | D | D | WES |
| MCL37† | <i>CCND1</i>   | c.149A>G           | p.Lys50Arg          | 0.272 | 180 | 49  | T | B | WES |
| MCL37† | <i>COL14A1</i> | c.4637G>A          | p.Arg1546His        | 0.186 | 140 | 26  | T | D | WES |
| MCL37† | <i>COL14A1</i> | c.2771A>G          | p.Asn924Ser         | 0.464 | 239 | 111 | D | B | WES |
| MCL37† | <i>DLC1</i>    | c.762_763delinsCG  | p.GlnAsn254HisAsp   | 0.942 | 104 | 98  |   |   | WES |
| MCL37† | <i>KCNC2</i>   | c.512C>A           | p.Thr171Asn         | 0.432 | 37  | 16  | T | B | WES |
| MCL37† | <i>KDM4C</i>   | c.1304C>G          | p.Ala435Gly         | 0.506 | 81  | 41  | T | B | WES |
| MCL37† | <i>KMT2D</i>   | c.13885A>C         | p.Thr4629Pro        | 0.208 | 24  | 5   | D | D | WES |
| MCL37† | <i>NOTCH1</i>  | c.6849_6850ins     | p.Thr2284AspfsTer71 | 0.295 | 95  | 28  |   |   | WES |

|        |                  |                                          |                    |       |     |     |   |   |     |
|--------|------------------|------------------------------------------|--------------------|-------|-----|-----|---|---|-----|
| MCL37† | <i>ROBO2</i>     | c.73_75delinsATC                         | p.Val25Ile         | 0.129 | 286 | 37  |   |   | WES |
| MCL37† | <i>SYNE1</i>     | c.8578A>G                                | p.Thr286Ala        | 0.648 | 88  | 57  | D | B | WES |
| MCL37† | <i>SYNE1</i>     | c.12149_12150delinsGT                    | p.Lys405Ser        | 0.989 | 92  | 91  |   |   | WES |
| MCL38  | <i>CHEK2</i>     | c.1111C>T                                | p.His371Tyr        | 0.405 | 121 | 49  | D | P | TPS |
| MCL38  | <i>TNFRSF13B</i> | c.17G>A                                  | p.Arg6Gln          | 0.431 | 218 | 94  | D | B | TPS |
| MCL38  | <i>FBXO21</i>    | c.202A>T                                 | p.Ser68Cys         | 0.152 | 297 | 45  | D | P | TPS |
| MCL38  | <i>DCAF4L2</i>   | c.139C>T                                 | p.Arg47Cys         | 0.179 | 196 | 35  | D | D | TPS |
| MCL38  | <i>FGFR1</i>     | c.2201G>A                                | p.Arg734Gln        | 0.491 | 216 | 106 | D | D | TPS |
| MCL38  | <i>PRDM2</i>     | c.3190T>A                                | p.Phe1064Ile       | 0.529 | 34  | 18  | T | B | TPS |
| MCL38  | <i>DNAJC6</i>    | c.1367A>G                                | p.Asn456Ser        | 0.383 | 209 | 80  | T | B | TPS |
| MCL38  | <i>NCOR2</i>     | c.6532A>G                                | p.Ser2178Gly       | 0.436 | 179 | 78  | T | B | TPS |
| MCL38  | <i>WHSC1</i>     | c.3295G>A                                | p.Glu1099Lys       | 0.162 | 291 | 47  | D | D | TPS |
| MCL38  | <i>APC</i>       | c.1145G>A                                | p.Arg382Lys        | 0.498 | 217 | 108 | T | B | TPS |
| MCL38  | <i>ARID1B</i>    | c.993_1007delAGGAGGAGCAGGAGC             | p.Gly333_Gly337del | 0.244 | 90  | 22  |   |   | TPS |
| MCL38  | <i>ACTB</i>      | c.124-7T>A                               |                    | 0.464 | 151 | 70  |   |   | TPS |
| MCL39  | <i>ACTN2</i>     | c.1040C>T                                | p.Thr347Met        | 0.539 | 345 | 186 | D | D | TPS |
| MCL39  | <i>CSF1R</i>     | c.1606C>G                                | p.Leu536Val        | 0.455 | 165 | 75  | T | D | TPS |
| MCL39  | <i>ESX1</i>      | c.1013_1039dupGTGTGCCACCCGGGCCGCCATGGCGC | p.Arg338_Ala346dup | 0.725 | 51  | 37  |   |   | TPS |
| MCL39  | <i>LRP1B</i>     | c.7179T>G                                | p.Asp2393Glu       | 0.530 | 236 | 125 | D | D | TPS |
| MCL39  | <i>CRYBG3</i>    | c.116G>A                                 | p.Ser39Asn         | 0.461 | 456 | 210 |   | P | TPS |
| MCL39  | <i>NOTCH1</i>    | c.6652C>G                                | p.Leu2218Val       | 0.481 | 707 | 340 | T | P | TPS |
| MCL39  | <i>PLXNB3</i>    | c.4582G>A                                | p.Gly1528Arg       | 0.521 | 817 | 426 | T | B | TPS |
| MCL39  | <i>LRRK1</i>     | c.439T>C                                 | p.Cys147Arg        | 0.488 | 293 | 143 | T | B | TPS |

|        |                |                    |                     |       |     |     |   |   |     |
|--------|----------------|--------------------|---------------------|-------|-----|-----|---|---|-----|
| MCL39  | <i>TCF3</i>    | c.148C>T           | p.Leu50Phe          | 0.493 | 217 | 107 | D | D | TPS |
| MCL39  | <i>MUC16</i>   | c.10543C>T         | p.His3515Tyr        | 0.564 | 195 | 110 | D | B | TPS |
| MCL39  | <i>EP300</i>   | c.1283-6C>G        |                     | 0.520 | 100 | 52  |   |   | TPS |
| MCL39  | <i>WHSC1</i>   | c.3295G>A          | p.Glu1099Lys        | 0.263 | 308 | 81  | D | D | TPS |
| MCL39  | <i>CD83</i>    | c.220C>T           | p.Arg74Cys          | 0.529 | 272 | 144 | D | B | TPS |
| MCL39  | <i>CARD11</i>  | c.2081C>T          | p.Ser694Leu         | 0.580 | 572 | 332 | T | B | TPS |
| MCL39  | <i>ABCA13</i>  | c.3821A>G          | p.Glu1274Gly        | 0.531 | 177 | 94  | D | B | TPS |
| MCL39  | <i>MYC</i>     | c.1163G>A          | p.Ser388Asn         | 0.252 | 361 | 91  | D | D | TPS |
| MCL40  | <i>WDR90</i>   | c.4057C>T          | p.Arg1353Ter        | 0.267 | 15  | 4   |   |   | TPS |
| MCL40  | <i>KMT2D</i>   | c.6007C>A          | p.Leu2003Ile        | 0.273 | 22  | 6   | D | D | TPS |
| MCL40  | <i>SFI</i>     | c.1501A>G          | p.Met501Val         | 0.417 | 12  | 5   | T | B | TPS |
| MCL40  | <i>NCOR2</i>   | c.4073-6C>T        |                     | 0.385 | 13  | 5   |   |   | TPS |
| MCL40  | <i>TBC1D26</i> | c.167A>C           | p.Glu56Ala          | 0.182 | 11  | 2   | D | P | TPS |
| MCL40  | <i>PCSK2</i>   | c.1879G>T          | p.Val627Leu         | 0.724 | 29  | 21  | T | P | TPS |
| MCL40  | <i>ABCA13</i>  | c.10327G>A         | p.Asp3443Asn        | 0.533 | 15  | 8   | T | D | TPS |
| MCL41† | <i>KMT2D</i>   | c.8727_8730delAAGT | p.Ser2910ArgfsTer32 | 0.324 | 37  | 12  |   |   | TPS |
| MCL41† | <i>ATM</i>     | c.1802+2T>C        |                     | 0.188 | 32  | 6   |   |   | TPS |
| MCL41† | <i>PASK</i>    | c.1811dupG         | p.Ser605GlnfsTer12  | 0.500 | 34  | 17  |   |   | TPS |
| MCL41† | <i>RP1L1</i>   | c.235C>T           | p.Arg79Cys          | 0.322 | 118 | 38  | D | D | TPS |
| MCL41† | <i>DNAH5</i>   | c.6956C>T          | p.Thr2319Met        | 0.423 | 26  | 11  | D | D | TPS |
| MCL41† | <i>PRDM2</i>   | c.4826G>A          | p.Arg1609Gln        | 0.232 | 56  | 13  | D | D | TPS |
| MCL41† | <i>IKKBK</i>   | c.-18-10T>A        |                     | 0.381 | 21  | 8   |   |   | TPS |
| MCL41† | <i>KMT2A</i>   | c.7070C>G          | p.Pro2357Arg        | 0.542 | 48  | 26  | D | B | TPS |
| MCL41† | <i>EIF2AK4</i> | c.3529A>G          | p.Ile1177Val        | 0.484 | 128 | 62  | T | B | TPS |

|        |                |                |                      |       |      |      |   |   |     |
|--------|----------------|----------------|----------------------|-------|------|------|---|---|-----|
| MCL41† | <i>FLYWCHI</i> | c.962G>A       | p.Arg321Gln          | 0.371 | 202  | 75   | T | D | TPS |
| MCL41† | <i>CDH8</i>    | c.1247G>A      | p.Arg416His          | 0.436 | 39   | 17   | T | B | TPS |
| MCL41† | <i>CDH11</i>   | c.932A>G       | p.Asp311Gly          | 0.565 | 124  | 70   | T | D | TPS |
| MCL41† | <i>KLHL14</i>  | c.1841C>T      | p.Ala614Val          | 0.523 | 44   | 23   | D | P | TPS |
| MCL41† | <i>ATR</i>     | c.3637A>G      | p.Ser1213Gly         | 0.525 | 61   | 32   | D | D | TPS |
| MCL41† | <i>BCL6</i>    | c.1550C>T      | p.Ala517Val          | 0.338 | 80   | 27   | T | B | TPS |
| MCL41† | <i>BCL6</i>    | c.1549G>A      | p.Ala517Thr          | 0.316 | 76   | 24   | T | B | TPS |
| MCL41† | <i>PKHD1L1</i> | c.10813C>T     | p.Leu3605Phe         | 0.647 | 51   | 33   | T | P | TPS |
| MCL41† | <i>ATM</i>     | c.7310_7321dup | p.Lys2440_Val2441ins | 0.360 | 25   | 9    |   |   | WES |
| MCL41† | <i>COL11A1</i> | c.3727G>T      | p.Gly1243Trp         | 0.114 | 35   | 4    | D | D | WES |
| MCL41† | <i>KMT2D</i>   | c.8727_8730del | p.Ser2910ArgfsTer32  | 0.422 | 121  | 51   |   |   | WES |
| MCL41† | <i>PRDM2</i>   | c.4826G>A      | p.Arg1609Gln         | 0.500 | 14   | 7    | D | D | WES |
| MCL41† | <i>ROBO2</i>   | c.2066C>A      | p.Ala689Asp          | 0.129 | 31   | 4    | D | B | WES |
| MCL42  | <i>KMT2D</i>   | c.15597delT    | p.His5200IlefsTer43  | 0.293 | 1871 | 549  |   |   | TPS |
| MCL42  | <i>GPR37</i>   | c.1564delG     | p.Val522PhefsTer57   | 0.284 | 841  | 239  |   |   | TPS |
| MCL42  | <i>BRCA2</i>   | c.4854T>A      | p.Asp1618Glu         | 0.657 | 527  | 346  | T | B | TPS |
| MCL42  | <i>ABCA7</i>   | c.946G>A       | p.Glu316Lys          | 0.478 | 694  | 332  | D | P | TPS |
| MCL42  | <i>ANK2</i>    | c.8015A>C      | p.Gln2672Pro         | 0.514 | 729  | 375  | D | P | TPS |
| MCL42  | <i>ATM</i>     | c.6096A>C      | p.Arg2032Ser         | 0.474 | 504  | 239  | D | D | TPS |
| MCL42  | <i>BIRC3</i>   | c.1802C>A      | p.Thr601Lys          | 0.283 | 336  | 95   | D | D | TPS |
| MCL42  | <i>SYNE1</i>   | c.1710G>C      | p.Leu570Phe          | 0.369 | 739  | 273  | D | D | TPS |
| MCL42  | <i>SLC22A2</i> | c.112-9A>G     |                      | 0.487 | 973  | 474  |   |   | TPS |
| MCL42  | <i>DTX1</i>    | c.1318C>T      | p.Arg440Cys          | 0.642 | 1980 | 1272 | T | B | TPS |
| MCL42  | <i>CDH8</i>    | c.1686T>G      | p.Asn562Lys          | 0.518 | 500  | 259  | T | B | TPS |



|       |                 |                  |                    |       |      |      |   |   |     |
|-------|-----------------|------------------|--------------------|-------|------|------|---|---|-----|
| MCL42 | <i>LRP1B</i>    | c.2396G>A        | p.Arg799Gln        | 0.512 | 736  | 377  | T | P | TPS |
| MCL42 | <i>ATP10B</i>   | c.1388G>A        | p.Arg463Gln        | 0.300 | 787  | 236  | D | D | TPS |
| MCL42 | <i>PLEKHG1</i>  | c.289G>A         | p.Gly97Arg         | 0.606 | 1346 | 816  | T | B | TPS |
| MCL43 | <i>CDH23</i>    | c.5747G>A        | p.Arg1916His       | 0.410 | 1233 | 505  |   | D | TPS |
| MCL43 | <i>ASXL1</i>    | c.1465C>G        | p.Arg489Gly        | 0.450 | 1115 | 502  | D | P | TPS |
| MCL43 | <i>SYNE1</i>    | c.16688T>C       | p.Met5563Thr       | 0.490 | 290  | 142  | D | D | TPS |
| MCL43 | <i>SPEN</i>     | c.9032G>A        | p.Arg3011Gln       | 0.465 | 1413 | 657  | D | D | TPS |
| MCL43 | <i>FLG</i>      | c.8888C>T        | p.Ala2963Val       | 0.167 | 30   | 5    | D | B | TPS |
| MCL43 | <i>ARID5B</i>   | c.333G>C         | p.Lys111Asn        | 0.501 | 533  | 267  | D | D | TPS |
| MCL44 | <i>ATM</i>      | c.1333C>T        | p.Gln445Ter        | 0.191 | 618  | 118  |   |   | TPS |
| MCL44 | <i>ULK4</i>     | c.1797G>A        | p.Trp599Ter        | 0.430 | 632  | 272  |   |   | TPS |
| MCL44 | <i>ATM</i>      | c.7355T>C        | p.Leu2452Pro       | 0.166 | 566  | 94   | D | D | TPS |
| MCL44 | <i>ABCA7</i>    | c.1570C>T        | p.Arg524Trp        | 0.525 | 2262 | 1187 | D | D | TPS |
| MCL44 | <i>CCND1</i>    | c.106G>C         | p.Glu36Gln         | 0.282 | 3919 | 1104 | D | P | TPS |
| MCL44 | <i>KIAA1671</i> | c.5343-9T>C      |                    | 0.512 | 592  | 303  |   |   | TPS |
| MCL44 | <i>DNAH5</i>    | c.6589G>A        | p.Asp2197Asn       | 0.463 | 309  | 143  | D | D | TPS |
| MCL44 | <i>RIMS2</i>    | c.1676C>T        | p.Ala559Val        | 0.575 | 193  | 111  | T | P | TPS |
| MCL44 | <i>DNAJC6</i>   | c.1367A>G        | p.Asn456Ser        | 0.490 | 1338 | 656  | T | B | TPS |
| MCL44 | <i>ARID1B</i>   | c.5405G>A        | p.Arg1802Gln       | 0.550 | 1377 | 758  | T | P | TPS |
| MCL45 | <i>PRF1</i>     | c.1090_1091delCT | p.Leu364GlufsTer93 | 0.470 | 736  | 346  |   |   | TPS |
| MCL45 | <i>ABCA3</i>    | c.873+10C>T      |                    | 0.439 | 526  | 231  |   |   | TPS |
| MCL45 | <i>LAMA2</i>    | c.2288C>T        | p.Ala763Val        | 0.461 | 1326 | 611  | D | D | TPS |
| MCL45 | <i>ATP10B</i>   | c.1459G>C        | p.Ala487Pro        | 0.489 | 1037 | 507  | T | B | TPS |
| MCL45 | <i>EP300</i>    | c.1283-6C>G      |                    | 0.489 | 186  | 91   |   |   | TPS |

|       |                |              |              |       |      |     |   |   |     |
|-------|----------------|--------------|--------------|-------|------|-----|---|---|-----|
| MCL45 | <i>CARD6</i>   | c.2012C>T    | p.Ser671Phe  | 0.480 | 893  | 429 | D | P | TPS |
| MCL45 | <i>ARID1B</i>  | c.6017C>T    | p.Ala2006Val | 0.456 | 1204 | 549 | T | B | TPS |
| MCL45 | <i>HEPH</i>    | c.2309G>C    | p.Ser770Thr  | 0.996 | 505  | 503 | T | B | TPS |
| MCL46 | <i>SYNE1</i>   | c.17654G>A   | p.Arg5885His | 0.430 | 374  | 161 | D | D | TPS |
| MCL46 | <i>COL11A1</i> | c.1669G>A    | p.Gly557Arg  | 0.626 | 254  | 159 | T | P | TPS |
| MCL46 | <i>CDH23</i>   | c.8062A>G    | p.Ser2688Gly | 0.527 | 552  | 291 | T | B | TPS |
| MCL46 | <i>TCF12</i>   | c.484A>G     | p.Thr162Ala  | 0.432 | 398  | 172 | T | P | TPS |
| MCL46 | <i>FAT1</i>    | c.755A>C     | p.Glu252Ala  | 0.512 | 642  | 329 | T | B | TPS |
| MCL46 | <i>CARD11</i>  | c.2081C>T    | p.Ser694Leu  | 0.475 | 1833 | 870 | T | B | TPS |
| MCL46 | <i>ABL1</i>    | c.1678G>A    | p.Asp560Asn  | 0.404 | 552  | 223 | T | B | TPS |
| MCL47 | <i>DNAH5</i>   | c.6884C>T    | p.Ala2295Val | 0.496 | 284  | 141 | D | D | TPS |
| MCL47 | <i>PTPN11</i>  | c.148G>A     | p.Ala50Thr   | 0.460 | 139  | 64  | T | B | TPS |
| MCL47 | <i>CDC123</i>  | c.717+7A>G   |              | 0.435 | 138  | 60  |   |   | TPS |
| MCL47 | <i>CASP10</i>  | c.1045G>T    | p.Asp349Tyr  | 0.473 | 419  | 198 | D | D | TPS |
| MCL47 | <i>COL6A3</i>  | c.5419G>A    | p.Glu1807Lys | 0.441 | 805  | 355 | D | D | TPS |
| MCL47 | <i>SPEN</i>    | c.8161G>A    | p.Ala2721Thr | 0.492 | 695  | 342 | T | B | TPS |
| MCL47 | <i>CSF3R</i>   | c.1096G>A    | p.Gly366Arg  | 0.418 | 538  | 225 | D | D | TPS |
| MCL47 | <i>MMP8</i>    | c.379G>A     | p.Ala127Thr  | 0.448 | 310  | 139 | T | B | TPS |
| MCL47 | <i>TBC1D26</i> | c.547-4G>A   |              | 0.483 | 300  | 145 |   |   | TPS |
| MCL47 | <i>TCF3</i>    | c.1592C>T    | p.Thr531Met  | 0.435 | 301  | 131 |   | D | TPS |
| MCL47 | <i>ANKRD44</i> | c.1458-10T>C |              | 0.459 | 207  | 95  |   |   | TPS |
| MCL47 | <i>PDGFRB</i>  | c.11C>T      | p.Pro4Leu    | 0.492 | 311  | 153 | T | B | TPS |
| MCL47 | <i>ABCA13</i>  | c.10327G>A   | p.Asp3443Asn | 0.464 | 362  | 168 | T | D | TPS |
| MCL47 | <i>COL14A1</i> | c.1195G>A    | p.Val399Met  | 0.444 | 205  | 91  | D | D | TPS |

|        |                 |               |                     |       |      |     |   |   |     |
|--------|-----------------|---------------|---------------------|-------|------|-----|---|---|-----|
| MCL48* | <i>KMT2D</i>    | c.4877dupT    | p.Leu1626PhefsTer5  | 0.670 | 887  | 594 |   |   | TPS |
| MCL48* | <i>NAV3</i>     | c.694C>T      | p.Gln232Ter         | 0.407 | 639  | 260 |   |   | TPS |
| MCL48* | <i>NLRC5</i>    | c.5062C>T     | p.Gln1688Ter        | 0.400 | 80   | 32  |   |   | TPS |
| MCL48* | <i>SI</i>       | c.4693-2A>T   |                     | 0.387 | 419  | 162 |   |   | TPS |
| MCL48* | <i>CCND3</i>    | c.831_832insT | p.Pro278SerfsTer46  | 0.578 | 656  | 379 |   |   | TPS |
| MCL48* | <i>TNFAIP3</i>  | c.771dupT     | p.Val258CysfsTer12  | 0.578 | 941  | 544 |   |   | TPS |
| MCL48* | <i>DOCK4</i>    | c.2770C>T     | p.Arg924Ter         | 0.310 | 287  | 89  |   |   | TPS |
| MCL48* | <i>FLG</i>      | c.3321delA    | p.Gly1109GlufsTer13 | 0.885 | 200  | 177 |   |   | TPS |
| MCL48* | <i>KMT2D</i>    | c.6640G>A     | p.Ala2214Thr        | 0.276 | 417  | 115 | T | B | TPS |
| MCL48* | <i>IKZF1</i>    | c.59G>T       | p.Ter20TyrextTer?   | 0.367 | 1160 | 426 |   |   | TPS |
| MCL48* | <i>CREBBP</i>   | c.1319G>A     | p.Arg440Gln         | 0.365 | 572  | 209 | D | D | TPS |
| MCL48* | <i>MEF2B</i>    | c.163T>C      | p.Phe55Leu          | 0.413 | 579  | 239 | D | D | TPS |
| MCL48* | <i>SMC3</i>     | c.998T>G      | p.Leu333Arg         | 0.379 | 501  | 190 | D | D | TPS |
| MCL48* | <i>CHEK1</i>    | c.1417C>T     | p.Leu473Phe         | 0.330 | 561  | 185 | T | B | TPS |
| MCL48* | <i>BCL7A</i>    | c.70G>C       | p.Ala24Pro          | 0.345 | 1131 | 390 | D | P | TPS |
| MCL48* | <i>BCL7A</i>    | c.82G>A       | p.Val28Met          | 0.346 | 1011 | 350 | D | D | TPS |
| MCL48* | <i>CD70</i>     | c.175G>A      | p.Glu59Lys          | 0.397 | 131  | 52  | D | D | TPS |
| MCL48* | <i>IGLL5</i>    | c.154C>T      | p.Pro52Ser          | 0.204 | 294  | 60  | D | B | TPS |
| MCL48* | <i>IGLL5</i>    | c.206+8G>C    |                     | 0.272 | 158  | 43  |   |   | TPS |
| MCL48* | <i>FAT4</i>     | c.1774G>T     | p.Val592Leu         | 0.315 | 391  | 123 | T | B | TPS |
| MCL48* | <i>HIST1H1C</i> | c.516G>C      | p.Lys172Asn         | 0.606 | 792  | 480 | D | D | TPS |
| MCL48* | <i>ARID1B</i>   | c.347A>G      | p.Gln116Arg         | 0.347 | 1087 | 377 | D | B | TPS |
| MCL48* | <i>PCLO</i>     | c.5111T>A     | p.Leu1704Gln        | 0.395 | 157  | 62  | D | D | TPS |
| MCL48* | <i>ESX1</i>     | c.1015G>C     | p.Val339Leu         | 0.540 | 359  | 194 | T | B | TPS |

|        |                 |             |              |       |      |      |   |   |     |
|--------|-----------------|-------------|--------------|-------|------|------|---|---|-----|
| MCL48* | <i>NOTCH2</i>   | c.1454-6G>T |              | 0.414 | 374  | 155  |   |   | TPS |
| MCL48* | <i>CDH23</i>    | c.1990G>A   | p.Glu664Lys  | 0.556 | 135  | 75   |   | P | TPS |
| MCL48* | <i>ZNF521</i>   | c.1546C>T   | p.Pro516Ser  | 0.592 | 382  | 226  | T | P | TPS |
| MCL48* | <i>LRP1B</i>    | c.12956G>A  | p.Arg4319Lys | 0.363 | 182  | 66   | T | B | TPS |
| MCL48* | <i>IGLL5</i>    | c.140G>C    | p.Ser47Thr   | 0.512 | 344  | 176  | D | P | TPS |
| MCL48* | <i>GNAT1</i>    | c.508G>A    | p.Val170Met  | 0.235 | 519  | 122  | D | D | TPS |
| MCL48* | <i>FBXW7</i>    | c.1236+6T>A |              | 0.466 | 491  | 229  |   |   | TPS |
| MCL48* | <i>ESX1</i>     | c.1013G>C   | p.Arg338Pro  | 0.519 | 349  | 181  | T | B | TPS |
| MCL49† | <i>PKD1</i>     | c.9136C>T   | p.Arg3046Cys | 0.293 | 242  | 71   | D | D | TPS |
| MCL49† | <i>SYNE1</i>    | c.8726C>T   | p.Ser2909Leu | 0.235 | 153  | 36   | T | B | TPS |
| MCL49† | <i>TRPM6</i>    | c.4591C>T   | p.Arg1531Cys | 0.326 | 95   | 31   | T | B | TPS |
| MCL49† | <i>PDCD1LG2</i> | c.131T>C    | p.Phe44Ser   | 0.200 | 110  | 22   | D | D | TPS |
| MCL49† | <i>MTOR</i>     | c.3401C>T   | p.Ala1134Val | 0.321 | 84   | 27   | T | B | TPS |
| MCL49† | <i>BCL10</i>    | c.485C>T    | p.Thr162Met  | 0.525 | 80   | 42   | D | D | TPS |
| MCL49† | <i>ZNF296</i>   | c.1393C>T   | p.Arg465Trp  | 0.370 | 284  | 105  | D | P | TPS |
| MCL49† | <i>CREG2</i>    | c.502A>G    | p.Thr168Ala  | 0.258 | 93   | 24   | D | D | TPS |
| MCL49† | <i>TNFAIP3</i>  | c.1397G>T   | p.Ser466Ile  | 0.167 | 198  | 33   | D | D | TPS |
| MCL50* | <i>ULK4</i>     | c.1797G>A   | p.Trp599Ter  | 0.406 | 96   | 39   |   |   | TPS |
| MCL50* | <i>RBI</i>      | c.1861C>A   | p.Arg621Ser  | 0.536 | 56   | 30   | T | B | TPS |
| MCL50* | <i>BRIP1</i>    | c.2854A>G   | p.Ile952Val  | 0.420 | 100  | 42   | T | B | TPS |
| MCL50* | <i>ATR</i>      | c.190A>G    | p.Thr64Ala   | 0.600 | 35   | 21   | T | B | TPS |
| MCL50* | <i>SYNE1</i>    | c.13511G>T  | p.Cys4504Phe | 0.575 | 73   | 42   | D | D | TPS |
| MCL50* | <i>CCND1</i>    | c.139T>C    | p.Cys47Arg   | 0.484 | 2220 | 1074 | D | B | TPS |
| MCL50* | <i>TCTN2</i>    | c.1724C>T   | p.Ala575Val  | 0.409 | 477  | 195  | D | P | TPS |

|        |                |                |                   |       |      |      |   |   |     |
|--------|----------------|----------------|-------------------|-------|------|------|---|---|-----|
| MCL50* | <i>SLITRK6</i> | c.302C>T       | p.Ala101Val       | 0.455 | 88   | 40   | T | B | TPS |
| MCL50* | <i>U2AF2</i>   | c.691G>A       | p.Asp231Asn       | 0.414 | 512  | 212  | D | D | TPS |
| MCL50* | <i>ATR</i>     | c.1481C>G      | p.Ala494Gly       | 0.494 | 85   | 42   | T | B | TPS |
| MCL50* | <i>ZNF117</i>  | c.899G>C       | p.Ser300Thr       | 0.194 | 36   | 7    | T | B | TPS |
| MCL50* | <i>PRDM2</i>   | c.5060G>A      | p.Arg1687Gln      | 0.468 | 1064 | 498  | D | D | TPS |
| MCL50* | <i>HEATR1</i>  | c.5355+10G>A   |                   | 0.402 | 876  | 352  |   |   | TPS |
| MCL50* | <i>ZEB1</i>    | c.242A>G       | p.Asn81Ser        | 0.500 | 108  | 54   | T | B | TPS |
| MCL50* | <i>MKI67</i>   | c.4589G>A      | p.Arg1530Gln      | 0.401 | 521  | 209  | T | P | TPS |
| MCL50* | <i>IRF8</i>    | c.19G>A        | p.Gly7Ser         | 0.354 | 390  | 138  | T | D | TPS |
| MCL50* | <i>MAP3K14</i> | c.2281G>A      | p.Gly761Arg       | 0.441 | 1007 | 444  |   | D | TPS |
| MCL50* | <i>ABCA7</i>   | c.4590G>A      | p.Met1530Ile      | 0.458 | 629  | 288  | T | B | TPS |
| MCL50* | <i>BCR</i>     | c.1402A>G      | p.Ser468Gly       | 0.518 | 1522 | 788  | D | B | TPS |
| MCL50* | <i>ANK2</i>    | c.2900+5165A>G |                   | 0.465 | 71   | 33   | D | D | TPS |
| MCL50* | <i>MAP1B</i>   | c.2768T>C      | p.Ile923Thr       | 0.489 | 319  | 156  | T | B | TPS |
| MCL50* | <i>CCND1</i>   | c.139T>C       | p.Cys47Arg        | 0.416 | 202  | 84   | D | B | WES |
| MCL50* | <i>KMT2D</i>   | c.1940dup      | p.Pro648ThrfsTer2 | 0.154 | 52   | 8    |   |   | WES |
| MCL50* | <i>MEF2B</i>   | c.68A>G        | p.Lys23Arg        | 0.438 | 240  | 105  | D | D | WES |
| MCL50* | <i>U2AF2</i>   | c.691G>A       | p.Asp231Asn       | 0.427 | 241  | 103  | D | D | WES |
| MCL51  | <i>PTEN</i>    | c.521_522delAT | p.Tyr174CysfsTer5 | 0.551 | 207  | 114  |   |   | TPS |
| MCL51  | <i>ATRX</i>    | c.2806G>C      | p.Val936Leu       | 0.496 | 234  | 116  | T | B | TPS |
| MCL51  | <i>ACTN2</i>   | c.1040C>T      | p.Thr347Met       | 0.479 | 1015 | 486  | D | D | TPS |
| MCL51  | <i>CCND1</i>   | c.131A>G       | p.Tyr44Cys        | 0.608 | 2120 | 1290 | D | D | TPS |
| MCL51  | <i>ATM</i>     | c.449T>C       | p.Leu150Pro       | 0.786 | 304  | 239  | D | D | TPS |
| MCL51  | <i>PKHD1L1</i> | c.11590C>T     | p.Arg3864Cys      | 0.504 | 365  | 184  | D | D | TPS |

|       |                |                      |                     |       |      |     |   |   |     |
|-------|----------------|----------------------|---------------------|-------|------|-----|---|---|-----|
| MCL51 | <i>MKI67</i>   | c.1927T>C            | p.Cys643Arg         | 0.315 | 336  | 106 | D | D | TPS |
| MCL51 | <i>TCF3</i>    | c.1592C>T            | p.Thr531Met         | 0.380 | 353  | 134 |   | D | TPS |
| MCL51 | <i>ZNF85</i>   | c.32T>C              | p.Ile11Thr          | 0.482 | 361  | 174 | D | D | TPS |
| MCL51 | <i>TNRC6B</i>  | c.871G>A             | p.Asp291Asn         | 0.483 | 588  | 284 | T | P | TPS |
| MCL51 | <i>ATR</i>     | c.265A>G             | p.Ser89Gly          | 0.588 | 434  | 255 | D | B | TPS |
| MCL51 | <i>ZNF608</i>  | c.1388G>T            | p.Gly463Val         | 0.696 | 230  | 160 | D | D | TPS |
| MCL51 | <i>ATP10B</i>  | c.2246G>A            | p.Arg749His         | 0.453 | 909  | 412 | T | D | TPS |
| MCL51 | <i>SYNE1</i>   | c.20293C>T           | p.Arg6765Cys        | 0.322 | 304  | 98  | D | D | TPS |
| MCL51 | <i>ACTB</i>    | c.985-9C>T           |                     | 0.292 | 620  | 181 |   |   | TPS |
| MCL52 | <i>TP53</i>    | c.711G>T             | p.Met237Ile         | 0.305 | 932  | 284 | D | D | TPS |
| MCL52 | <i>SP140</i>   | c.1365dupC           | p.Cys456LeufsTer20  | 0.352 | 1096 | 386 |   |   | TPS |
| MCL52 | <i>TP53</i>    | XR_243566.1:n.850G>T |                     | 0.305 | 932  | 284 | D | D | TPS |
| MCL52 | <i>ATM</i>     | c.7358G>C            | p.Arg2453Pro        | 0.560 | 405  | 227 | T | P | TPS |
| MCL52 | <i>TET2</i>    | c.2440C>T            | p.Arg814Cys         | 0.500 | 806  | 403 | D | B | TPS |
| MCL52 | <i>BIRC3</i>   | c.244C>T             | p.Pro82Ser          | 0.392 | 477  | 187 | D | D | TPS |
| MCL52 | <i>SMARCA4</i> | c.3547G>A            | p.Asp1183Asn        | 0.356 | 775  | 276 | D | D | TPS |
| MCL52 | <i>ACTN4</i>   | c.913-7C>G           |                     | 0.433 | 409  | 177 |   |   | TPS |
| MCL52 | <i>DNAH5</i>   | c.10658G>A           | p.Arg3553Gln        | 0.420 | 509  | 214 | D | P | TPS |
| MCL52 | <i>SFI</i>     | c.855-5T>C           |                     | 0.470 | 251  | 118 |   |   | TPS |
| MCL52 | <i>NRXN3</i>   | c.1085G>A            | p.Arg362His         | 0.260 | 538  | 140 | D | D | TPS |
| MCL52 | <i>ANKRD44</i> | c.2144A>G            | p.His715Arg         | 0.495 | 562  | 278 | T | D | TPS |
| MCL52 | <i>TNRC6B</i>  | c.1966G>A            | p.Ala656Thr         | 0.499 | 805  | 402 | D | B | TPS |
| MCL52 | <i>DLC1</i>    | c.1042G>C            | p.Asp348His         | 0.347 | 449  | 156 | D | D | TPS |
| MCL53 | <i>ZFH3</i>    | c.9583_9584insT      | p.Pro3195LeufsTer44 | 0.532 | 523  | 278 |   |   | TPS |

|       |                |              |              |       |     |     |   |   |     |
|-------|----------------|--------------|--------------|-------|-----|-----|---|---|-----|
| MCL53 | <i>ABCA3</i>   | c.1669T>C    | p.Tyr557His  | 0.472 | 644 | 304 | D | D | TPS |
| MCL53 | <i>COL11A1</i> | c.3853-10C>A |              | 0.222 | 90  | 20  |   |   | TPS |
| MCL53 | <i>ANK2</i>    | c.10682-8T>C |              | 0.462 | 238 | 110 |   |   | TPS |
| MCL53 | <i>CARD6</i>   | c.2326G>A    | p.Ala776Thr  | 0.419 | 227 | 95  | T | B | TPS |
| MCL53 | <i>PCLO</i>    | c.12217C>G   | p.Leu4073Val | 0.563 | 334 | 188 | T | B | TPS |
| MCL53 | <i>PKD1</i>    | c.6928G>A    | p.Gly2310Arg | 0.480 | 371 | 178 | T | D | TPS |
| MCL53 | <i>MKI67</i>   | c.2720G>A    | p.Arg907Lys  | 0.386 | 254 | 98  | T | B | TPS |
| MCL53 | <i>CDH8</i>    | c.2084T>C    | p.Leu695Ser  | 0.573 | 302 | 173 | T | B | TPS |
| MCL53 | <i>IRF8</i>    | c.19G>A      | p.Gly7Ser    | 0.416 | 807 | 336 | T | D | TPS |
| MCL53 | <i>ABCA6</i>   | c.647A>C     | p.Asn216Thr  | 0.480 | 321 | 154 | T | B | TPS |
| MCL53 | <i>BCL2L11</i> | c.*30T>C     |              | 0.388 | 245 | 95  |   |   | TPS |
| MCL53 | <i>PRDMI</i>   | c.89C>G      | p.Ala30Gly   | 0.494 | 640 | 316 | T | P | TPS |
| MCL53 | <i>KDM4C</i>   | c.1304C>G    | p.Ala435Gly  | 0.501 | 495 | 248 | T | B | TPS |

**Supplementary Table S7.** Genetic variants identified in 53 patients with mantle cell lymphoma. VAF, variant allele frequency; D, damaging;

T, tolerated; P, possibly damaging; B, benign; TPS, targeted panel sequencing; WES, whole-exome sequencing. \*Initial sample. †Relapse sample.
